# Supplementary material for: Clinical management of community-acquired meningitis in adults in the UK and Ireland in 2017: a retrospective cohort study on behalf of the National Infection Trainees Collaborative for Audit and Research (NITCAR)
Source: PubMed Central journal article supplement (PMC9315913; doi:10.1136/bmjopen-2022-062698), 2022-07-12
Supplement: bmjopen-2022-062698.draft_revisions.pdf [file bmjopen-2022-062698.draft_revisions.pdf]

# BMJ Open

BMJ Open is committed to open peer review. As part of this commitment we make the peer review history of every article we publish publicly available.

When an article is published we post the peer reviewers' comments and the authors' responses online. We also post the versions of the paper that were used during peer review. These are the versions that the peer review comments apply to.

The versions of the paper that follow are the versions that were submitted during the peer review process. They are not the versions of record or the final published versions. They should not be cited or distributed as the published version of this manuscript.

BMJ Open is an open access journal and the full, final, typeset and author-corrected version of record of the manuscript is available on our site with no access controls, subscription charges or pay-per-view fees (<http://bmjopen.bmj.com>).

If you have any questions on BMJ Open's open peer review process please email [info.bmjopen@bmj.com](mailto:info.bmjopen@bmj.com)

# BMJ Open

**Clinical management of community-acquired meningitis in adults in the United Kingdom and Ireland in 2017: a retrospective cohort study on behalf of the National Infection Trainees Collaborative for Audit and Research (NITCAR).**

|                               |                                                                                                                                                                                                                                                                                                                                                                                                                                                                                                                                                                                                                                                                                                                                                                                                                                                                                                                                                                        |
|-------------------------------|------------------------------------------------------------------------------------------------------------------------------------------------------------------------------------------------------------------------------------------------------------------------------------------------------------------------------------------------------------------------------------------------------------------------------------------------------------------------------------------------------------------------------------------------------------------------------------------------------------------------------------------------------------------------------------------------------------------------------------------------------------------------------------------------------------------------------------------------------------------------------------------------------------------------------------------------------------------------|
| Journal:                      | <i>BMJ Open</i>                                                                                                                                                                                                                                                                                                                                                                                                                                                                                                                                                                                                                                                                                                                                                                                                                                                                                                                                                        |
| Manuscript ID                 | bmjopen-2022-062698                                                                                                                                                                                                                                                                                                                                                                                                                                                                                                                                                                                                                                                                                                                                                                                                                                                                                                                                                    |
| Article Type:                 | Original research                                                                                                                                                                                                                                                                                                                                                                                                                                                                                                                                                                                                                                                                                                                                                                                                                                                                                                                                                      |
| Date Submitted by the Author: | 21-Mar-2022                                                                                                                                                                                                                                                                                                                                                                                                                                                                                                                                                                                                                                                                                                                                                                                                                                                                                                                                                            |
| Complete List of Authors:     | Ellis, Jayne; UCL, Harvey, David; Wirral University Teaching Hospital NHS Foundation Trust<br>Defres, Sylviane; University of Liverpool; Royal Liverpool and Broadgreen Hospitals NHS Trust<br>Chandna, Arjun ; Cambodia Oxford Medical Research Unit, Angkor Hospital for Children, ; University of Oxford Centre for Tropical Medicine and Global Health,<br>MacLachlan, Eloisa; University of Leeds; National Student Association of Medical Research<br>Solomon, Tom; University of Liverpool, Neurological Science, Medical Microbiology<br>Heyderman, Robert; University College London, Division of Infection and Immunity; University of Malawi College of Medicine, Malawi Liverpool Wellcome Trust Clinical Research Programme<br>McGill, Fiona; University of Liverpool, Institute of Infection and Global Health; Leeds Teaching Hospitals NHS Trust, Infectious Diseases study group, NAMM; British Infection Association, Collaborative authorship group |
| Keywords:                     | Diagnostic microbiology < INFECTIOUS DISEASES, Molecular diagnostics < INFECTIOUS DISEASES, Infectious disease/HIV < NEUROLOGY, INTERNAL MEDICINE, Protocols & guidelines < HEALTH SERVICES ADMINISTRATION & MANAGEMENT                                                                                                                                                                                                                                                                                                                                                                                                                                                                                                                                                                                                                                                                                                                                                |
|                               |                                                                                                                                                                                                                                                                                                                                                                                                                                                                                                                                                                                                                                                                                                                                                                                                                                                                                                                                                                        |

SCHOLARONE™  
Manuscripts

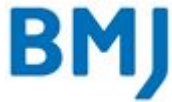

I, the Submitting Author has the right to grant and does grant on behalf of all authors of the Work (as defined in the below author licence), an exclusive licence and/or a non-exclusive licence for contributions from authors who are: i) UK Crown employees; ii) where BMJ has agreed a CC-BY licence shall apply, and/or iii) in accordance with the terms applicable for US Federal Government officers or employees acting as part of their official duties; on a worldwide, perpetual, irrevocable, royalty-free basis to BMJ Publishing Group Ltd ("BMJ") its licensees and where the relevant Journal is co-owned by BMJ to the co-owners of the Journal, to publish the Work in this journal and any other BMJ products and to exploit all rights, as set out in our [licence](#).

The Submitting Author accepts and understands that any supply made under these terms is made by BMJ to the Submitting Author unless you are acting as an employee on behalf of your employer or a postgraduate student of an affiliated institution which is paying any applicable article publishing charge ("APC") for Open Access articles. Where the Submitting Author wishes to make the Work available on an Open Access basis (and intends to pay the relevant APC), the terms of reuse of such Open Access shall be governed by a Creative Commons licence – details of these licences and which [Creative Commons](#) licence will apply to this Work are set out in our licence referred to above.

Other than as permitted in any relevant BMJ Author's Self Archiving Policies, I confirm this Work has not been accepted for publication elsewhere, is not being considered for publication elsewhere and does not duplicate material already published. I confirm all authors consent to publication of this Work and authorise the granting of this licence.

1  
2  
3 **Clinical management of community-acquired meningitis in adults in the United**

4  
5  
6 **Kingdom and Ireland in 2017: a retrospective cohort study on behalf of the National**

7  
8 **Infection Trainees Collaborative for Audit and Research (NITCAR).**

9  
10  
11 Jayne Ellis, Specialty trainee<sup>1</sup>, David Harvey, Consultant<sup>2</sup>, Sylviane Defres, Consultant<sup>3,4,10</sup>,  
12 Arjun Chandna, Specialty trainee<sup>5,6</sup>, Eloisa Maclachlan, Medical Student<sup>7,8</sup>, Tom Solomon,  
13 Professor<sup>4,9,10</sup>, Robert S Heyderman (0000-0003-4573-449X), Professor<sup>1,11</sup>, Fiona McGill  
14 (0000-0002-0903-9046), Consultant<sup>\*4,10,12</sup> on behalf of the NAMM (national audit of  
15 meningitis management) group.

16  
17 \*Corresponding author: [f.mcgill@nhs.net](mailto:f.mcgill@nhs.net)

- 18  
19  
20  
21  
22  
23  
24  
25  
26  
27  
28  
29  
30  
31  
32  
33  
34  
35  
36  
37  
38  
39  
40  
41  
42  
43  
44  
45  
46  
47  
48  
49  
50  
51  
52  
53  
54  
55  
56  
57  
58  
59  
60
1. Hospital for Tropical Diseases, University College London Hospitals NHS Foundation Trust, London, UK.
  2. Wirral University Teaching Hospital NHS Foundation Trust, UK
  3. Liverpool University Hospitals NHS Foundation Trust, Liverpool, UK
  4. Institute of Infection, Veterinary and Ecological sciences, University of Liverpool, UK  
Nuffield department of Medicine, University of Oxford
  5. Department of Clinical research, London School of Hygiene and Tropical Medicine, London, UK
  6. Mahidol-Oxford Tropical Medicine Research Unit, Mahidol University, Bangkok, Thailand
  7. University of Leeds, Leeds, UK
  8. National Student Association for Medical Research
  9. The Walton Centre NHS Foundation Trust, Liverpool, UK
  10. NIHR Health Protection Research Unit for Emerging and Zoonotic infections, University of Liverpool, Liverpool, UK
  11. Research Department of Infection, Division of Infection and Immunity, University College London, London, UK.
  12. Department of Infection and Travel Medicine and Department of Microbiology, Leeds Teaching Hospitals NHS Trust, Leeds, UK

\*Corresponding author: [f.mcgill@nhs.net](mailto:f.mcgill@nhs.net).

**Corresponding author:** Dr Fiona McGill, Leeds Teaching Hospitals NHS Trust, Beckett

Street, Leeds, LS9 7TF

[f.mcgill@nhs.net](mailto:f.mcgill@nhs.net).

**COI:** None to declare

**Key words:** meningitis, adults, bacteria, antibiotics, management, guidelines

Word Count: 2901

1  
2  
3 40 **Abstract**

4 41 **Objectives:** To assess current practice of suspected community acquired bacterial meningitis  
5  
6 42 in adults in the UK.

7  
8  
9 43 **Design:** Retrospective cohort

10  
11 44 **Setting:** 64 UK and Irish hospitals

12  
13 45 **Participants:** 1,471 adults with community acquired meningitis of any aetiology, admitted in  
14  
15  
16 46 2017.

17  
18 47 **Results:** None of the audit standards, from the 2016 UK Joint Specialists Societies guideline  
19  
20 48 on the diagnosis and management of meningitis, were met in all cases. With respect to 20 of  
21  
22 49 the 30 assessed standards, the clinical management provided for patients was in line with  
23  
24 50 recommendations in less than 50% of cases. 45% of patients had blood cultures taken within  
25  
26 51 an hour of admission, 0.5% had a lumbar puncture within one hour, 26% within 8 hours. 28%  
27  
28 52 had bacterial molecular diagnostic tests on CSF. Median time to first dose of antibiotics was  
29  
30 53 3.2 hours (IQR 1.3-9.2). 82% received empirical parenteral cephalosporins. 55%  $\geq$  60 years  
31  
32 54 and 31% of immunocompromised patients received anti-*Listeria* antibiotics. 21% of patients  
33  
34 55 received steroids. Of the 1,471 patients, 21% had confirmed bacterial meningitis. Amongst  
35  
36 56 those with bacterial meningitis, pneumococcal aetiology, admission to intensive care and initial  
37  
38 57 Glasgow Coma Scale score less than 14 were associated with in-hospital mortality (aOR 2.08,  
39  
40 58 95% CI 0.96 – 4.48; aOR 4.28, 95% CI 1.81 – 10.1; aOR 2.90, 95% CI 1.26 – 6.71  
41  
42 59 respectively). Dexamethasone therapy was weakly associated with a reduction in mortality in  
43  
44 60 both those with proven bacterial meningitis (aOR 0.57, 95% CI 0.28 – 1.17) and with  
45  
46 61 pneumococcal meningitis (aOR 0.47, 95% CI 0.20 – 1.10).

47  
48 62 **Conclusion:** This large study demonstrates that clinical care for patients with meningitis in the  
49  
50 63 UK is not in line with current evidence-based national guidelines. Diagnostics and therapeutics  
51  
52 64 should be targeted for quality improvement strategies. Additionally, work should be done to  
53  
54  
55  
56  
57  
58  
59  
60

1  
2  
3 65 improve the reach and impact of guidelines, once published, to ensure they translate into  
4  
5 66 changes in practice.  
6  
7

8 67  
9  
10  
11  
12  
13  
14  
15  
16  
17  
18  
19  
20  
21  
22  
23  
24  
25  
26  
27  
28  
29  
30  
31  
32  
33  
34  
35  
36  
37  
38  
39  
40  
41  
42  
43  
44  
45  
46  
47  
48  
49  
50  
51  
52  
53  
54  
55  
56  
57  
58  
59  
60

For peer review only

## 68 **Strengths and Limitations of this study**

- 69 • This is the largest national study of the management of meningitis in the UK  
70 published to date
- 71 • The study includes all suspected community acquired bacterial meningitis, allowing  
72 assessment of early clinical care prior to an aetiological diagnosis being made
- 73 • The study is widely translatable, and therefore representative of practice within the  
74 UK and Ireland
- 75 • The study is limited by its retrospective design which brings associated recall bias and  
76 some missing data
- 77 • The study may also be limited by the self-selection of the sites included

## 78 **Introduction**

79  
80  
81 Acute bacterial meningitis is a medical emergency associated with considerable death  
82 and disability in the UK(1). Successful immunisation programmes targeting *Haemophilus*  
83 *influenzae* type b, *Streptococcus pneumoniae* and *Neisseria meningitidis* means that  
84 community acquired bacterial meningitis, particularly in children and adolescents, is now  
85 relatively rare (2). The incidence of bacterial meningitis in adults in England is estimated to be  
86 approximately 1-1.25 per 100,000 population overall, exceeding 9 per 100,000 in people over  
87 70 years (2, 3).

88 Early recognition of meningitis, appropriate investigation, and treatment, saves lives  
89 (4, 5). It is therefore essential that front-line clinicians, who may not encounter meningitis very  
90 often, are vigilant and have a high index of suspicion to minimise poor outcomes. To help  
91 frontline medical staff who are seeing patients with suspected meningitis, the UK guidelines  
92 on the diagnosis and management of acute meningitis and meningococcal sepsis in  
93 immunocompetent adults were published in 2016(6). The guidelines provide readily accessible,  
94 comprehensive, evidenced-based recommendations. Previously published data suggest that  
95 clinical care delivered in the UK is frequently non-adherent to guidelines(7, 8). A recent UK  
96 study of viral meningitis also highlighted a large amount of inappropriate brain imaging prior  
97 to lumbar punctures (LPs) and long delays in performing the LP (3, 9). Inadequate use of

1  
2  
3 98 molecular diagnostics and HIV-testing have also been highlighted as areas for improvement(3).  
4  
5 99 The increasing risk of multi-drug resistant bacteria, an ageing population susceptible to a wider  
6  
7  
8 100 variety of bacteria (e.g. *Listeria monocytogenes*, *Escherichia coli* and *Klebsiella*  
9  
10 101 *pneumoniae*)(2) and the greater appreciation that viruses are a common cause of meningitis in  
11  
12 102 UK adults(10), make diagnostics essential. Reports from outside the UK have shown  
13  
14 103 improvements in outcomes following guideline publication and implementation (11). We  
15  
16 104 carried out a retrospective observational study with the dual aims of i) assessing current clinical  
17  
18 105 practice regarding diagnosis and management of adult patients with suspected community  
19  
20 106 acquired bacterial meningitis, and ii) to identify areas for improvement.

## 107 **Methods**

108  
109 Hospitals in the UK were invited to take part in this study via the National Infection  
110  
111 Trainees Collaborative for Audit and Research (NITCAR) network, the UK Meningitis study  
112  
113 network, the British Infection Association (BIA) and through personal contacts. Eligible  
114  
115 patients were identified via hospital coding data, laboratory data, or a combination of both.  
116  
117 Data from patients aged 16 or over who presented with suspected acute community acquired  
118  
119 bacterial meningitis during 2017 were eligible for screening. Patients who met our case  
120  
121 definition for confirmed acute meningitis, regardless of aetiology, were eligible for inclusion  
122  
123 (box 1). Definitions are as previously published(3). Many interventions are performed prior  
to knowing the final diagnosis, therefore, we included all types of meningitis in the analysis,  
including viral and those in whom no pathogen was identified. This allowed us to assess the  
entire clinical pathway of patients presenting with possible bacterial meningitis, although  
some would be ultimately diagnosed with a different aetiology, or no confirmed aetiology at  
all.



**Box 1: Inclusion and exclusion criteria for cases of meningitis.**A meningitis case was defined as:

- (1) Patients with a cerebrospinal fluid (CSF) WCC  $>4 \times 10^6$  cells/L (regardless of whether a pathogen was identified or not) and a clinical suspicion of meningitis at the time OR
- (2) in the case of bacterial meningitis, symptoms and signs of meningitis with a significant pathogen in the CSF (culture or PCR) or blood regardless of CSF leukocyte count.

Patients with the following diagnoses were excluded:

- (1) Cryptococcal meningitis;
- (2) Tuberculous meningitis;
- (3) Nosocomial meningitis (defined as meningitis that occurs during a hospital admission or within 30 days of discharge or meningitis associated with indwelling devices in the central nervous system)
- (4) Encephalitis (defined as altered consciousness for  $>24$  with no other cause found and two or more of the following signs: fever or history of fever ( $\geq 38^\circ\text{C}$ ) during the current illness; seizures or focal neurological signs (with evidence of brain parenchyma involvement); CSF pleocytosis ( $>4 \times 10^6$  cells per L); EEG suggesting encephalitis; and neuroimaging suggestive of encephalitis).

124 Standards indicative of good practice were taken from the 2016 UK Joint Specialists  
125 Societies guideline on the diagnosis and management of meningitis and meningococcal sepsis  
126 in immunocompetent adults, and the Standards in Microbiological Investigations on the  
127 processing of cerebrospinal fluid (B27) (6, 12). For each standard, the number of patients as a  
128 proportion of the total cohort who received clinical care in line with the standard is reported.  
129 A second adjusted analysis taking account of missing data is also reported, whereby the number  
130 of patients as a proportion of the cohort with available data who received clinical care in line  
131 with the standard was reported.

1  
2  
3 132 Data were collected using electronic case report forms on REDcap™, a password  
4  
5 133 protected central web-based database system. All microbiological diagnostic procedures were  
6  
7 134 performed at the local hospital laboratory for each participating site using locally approved  
8  
9 135 procedures. All data were anonymised and recorded under a unique participant identification  
10  
11 136 number.

12  
13  
14 137 *Ethics approval:* As all data were anonymised individual patient consent and ethical  
15  
16 138 approval was not required. The study was registered with each site's clinical governance  
17  
18 139 department in line with local procedure.

19  
20  
21 140 *Statistical analyses:* Descriptive statistics were used to summarize data. Categorical  
22  
23 141 data were summarized using counts and percentages. Denominators presented are based on  
24  
25 142 available data, where incomplete case records were submitted by contributing sites. For  
26  
27 143 continuous variables, means and ranges or medians and inter-quartile ranges (IQRs) are  
28  
29 144 presented depending on the distribution of the data. Categorical data were analysed using Chi  
30  
31 145 squared or Fisher's exact test. Continuous data were analysed using t-tests, Mann Whitney U  
32  
33 146 or Kruskal Wallis depending on the distribution of the data. Regression analysis was used to  
34  
35 147 identify potential risk factors associated with poor outcomes.

36  
37  
38 148 Patient and Public Involvement. Although there was no direct involvement of patients  
39  
40 149 and public in this study the Meningitis Research Foundation, a key advocacy group for patients  
41  
42 150 are represented in the authorship of the original guidelines and will be key in the dissemination  
43  
44 151 of the results and the subsequent call to improve practice. Preliminary results have been shared  
45  
46 152 with the Meningitis Research Foundation and some of their members.

## 51 153 **Results**

52 154  
53  
54 155 1,471 patients from 64 hospitals throughout the UK and Ireland took part. The hospitals  
55  
56 156 ranged in size from small district generals to larger teaching hospitals. The mean number of  
57  
58 157 beds was 846 (range 230-2000). The hospitals who took part in England comprised 45% of the  
59  
60

1  
2  
3 158 total acute bed base in England, (42,612/94,827(13)). Females accounted for 57% and the  
4  
5 159 median age was 34 years (IQR 26,49). Confirmed viral meningitis occurred in 615 (42%) and  
6  
7 160 303 had confirmed bacterial meningitis (21%). More than one third of patients (n=553) fulfilled  
8  
9 161 the case definition (box 1) but had no confirmed microbiological diagnosis and were therefore  
10  
11 162 categorised as meningitis of unknown aetiology. *Streptococcus pneumoniae* and *Neisseria*  
12  
13 163 *meningitidis*, were the most common bacterial pathogens, where a cause was found, accounting  
14  
15 164 for 172 (57%) and 76 (25%) of cases respectively. *Haemophilus influenzae* (serotypes  
16  
17 165 unknown) was found in 14 cases. *Enteroviruses* were the most common viral pathogens  
18  
19 166 occurring in 429 (69%) of all confirmed viral meningitis. *Herpes simplex virus-2* was the  
20  
21 167 second most common viral pathogen detected in 97 (16%) of viral cases. Baseline  
22  
23 168 demographics and clinical characteristics are shown in table 1.  
24  
25  
26  
27  
28  
29  
30  
31  
32  
33  
34  
35  
36  
37  
38  
39  
40  
41  
42  
43  
44  
45  
46  
47  
48  
49  
50  
51  
52  
53  
54  
55  
56  
57  
58  
59  
60

**Table 1: Baseline demographics, timing of key investigations and clinical outcomes of 1,471 adults presenting with suspected meningitis:**

|                                                                      | <i>Total cohort</i> | <i>Bacterial meningitis</i> | <i>Viral meningitis</i> | <i>Other<sup>†</sup></i> | <i>P value<sup>‡</sup></i> |
|----------------------------------------------------------------------|---------------------|-----------------------------|-------------------------|--------------------------|----------------------------|
|                                                                      | <i>N (%)</i>        | <i>N (%)</i>                | <i>N (%)</i>            | <i>N (%)</i>             |                            |
| <b>N</b>                                                             | 1,471 (100)         | 303 (21)                    | 615 (42)                | 553 (38)                 | -                          |
| <b>Median age (IQR)</b>                                              | 34 (26 – 49)        | 54 (36 – 65)                | 31 (25 – 37)            | 34 (26 – 48)             | < 0.001                    |
| <b>Male</b>                                                          | 625 (43)            | 173 (57)                    | 214 (35)                | 238 (43)                 | < 0.001                    |
| <b>In patient mortality</b>                                          | 48 (3)              | 38 (13)                     | 2 (0.3)                 | 8 (1.4)                  | < 0.001                    |
| <b>ITU admission</b>                                                 | 192 (13)            | 157 (53)                    | 4 (0.7)                 | 31 (6)                   | < 0.001                    |
| <b>Median Admission GCS (IQR)</b>                                    | 15 (14-15)          | 13 (9 – 15)                 | 15 (15-15)              | 15 (15-15)               | < 0.001                    |
| <b>Median time (hours) from admission to first antibiotics (IQR)</b> | 2.7 (0.9 – 8.3)     | 1.5 (0.4 – 5.3)             | 3.2 (1.3 – 8.3)         | 3.3. (1 – 12.5)          | < 0.001                    |
| <b>Median time (hours) from admission to blood cultures (IQR)</b>    | 1 (0.3 – 4)         | 0.7 (0.2 – 2.4)             | 1 (0.3 – 3.7)           | 1.4 (0.3 – 6.1)          | 0.003                      |
| <b>CT head prior to LP</b>                                           | 1,094 (94)          | 207 (93)                    | 459 (94)                | 428 (95)                 | 0.55                       |
| <b>Median time (hours) from admission to LP (IQR)</b>                | 16.4 (7.9 – 26.7)   | 14.8 (7.7 – 29.8)           | 14.3 (7.5 – 22.6)       | 20 (8.8 – 35.8)          | < 0.001                    |
| <b>Adjunctive dexamethasone</b>                                      | 300 (21)            | 150 (50)                    | 69 (11)                 | 81 (15)                  | < 0.001                    |
| <b>Median CSF leucocyte count (IQR)</b>                              | 140 (44-399)        | 930 (235.5 – 3062.5)        | 122 (48 – 276)          | 85 (26.8 – 250.3)        | < 0.001                    |
| <b>Median CSF protein (IQR)</b>                                      | 0.68 (0.46 - 1.21)  | 3.25 (1.4 – 5.8)            | 0.63 (0.45-0.9)         | 0.6 (0.4-1.0)            | < 0.001                    |
| <b>Median CSF glucose (IQR)</b>                                      | 3.2 (2.8-3.7)       | 2.1 (0.95 – 3.45)           | 3.2 (2.9 – 3.6)         | 3.3 (3.0-3.8)            | < 0.001                    |

<sup>†</sup>= other meningitis category included all patients without a confirmed bacterial or viral pathogen

<sup>‡</sup> = for continuous variables, the Kruskal-Wallis test was used to compare medians across groups, and for categorical variables Chi squared tests were used.

170

171 Adherence to specific standards of good practice is shown in table 2. None were  
 172 adhered to 100% of the time. Two thirds of the standards (n=20) had less than or equal to 50%  
 173 adherence.

1  
2  
3  
4  
5  
6  
7  
8  
9  
10  
11  
12  
13  
14  
15  
16  
17  
18  
19  
20  
21  
22  
23  
24  
25  
26  
27  
28  
29  
30  
31  
32  
33  
34  
35  
36  
37  
38  
39  
40  
41  
42  
43  
44  
45  
46

| <b>Table 2. Adherence to audit standards<sup>^</sup></b>                                                                                                                                                                                  |                                                                   |                   |                                                                     |                              |
|-------------------------------------------------------------------------------------------------------------------------------------------------------------------------------------------------------------------------------------------|-------------------------------------------------------------------|-------------------|---------------------------------------------------------------------|------------------------------|
| <b>Immediate management</b>                                                                                                                                                                                                               |                                                                   |                   |                                                                     |                              |
|                                                                                                                                                                                                                                           | <b>Number achieved standard/total number of patients analysed</b> | <b>% of total</b> | <b>Number achieved standard/total number of patients evaluable*</b> | <b>% of number evaluable</b> |
| 1. The patient's conscious level should be documented using the Glasgow coma scale.                                                                                                                                                       | 1,283/1,471                                                       | 87%               | 1283/1448                                                           | 89%                          |
| 2. Blood cultures should be taken as soon as possible and within 1 h of arrival at hospital                                                                                                                                               | 326/1,471 <sup>1</sup>                                            | 22%               | 326/767 <sup>2</sup>                                                | 42%                          |
| 3. LP should be performed within 1 h of arrival at hospital provided that it is safe to do so                                                                                                                                             | 8/1,471 <sup>3</sup>                                              | 0.5%              | 8/1379 <sup>4</sup>                                                 | 0.6%                         |
| 4. Antibiotic treatment should be commenced within the first hour                                                                                                                                                                         | 207/1471 <sup>5</sup>                                             | 14%               | 207/1083 <sup>6</sup>                                               | 19%                          |
| 5. Patients with meningitis and meningococcal sepsis should be cared for with the input of an infection specialist such as a microbiologist or a physician with training in infectious diseases and/or microbiology                       | 1,148/1,471 <sup>7</sup>                                          | 78%               | 1148/1464                                                           | 78%                          |
| <b>Investigations</b>                                                                                                                                                                                                                     |                                                                   |                   |                                                                     |                              |
| 6. Blood culture should be sent                                                                                                                                                                                                           | 977/1,471                                                         | 66%               | 977/1469                                                            | 67%                          |
| 7. Blood Pneumococcal PCR should be sent                                                                                                                                                                                                  | 211/1,471                                                         | 14%               | 211/1460                                                            | 14%                          |
| 8. Blood Meningococcal PCR should be sent                                                                                                                                                                                                 | 232/1,471                                                         | 16%               | 232/1461                                                            | 16%                          |
| 9. CSF opening pressure should be documented                                                                                                                                                                                              | 655/1,428 <sup>8</sup>                                            | 46%               | 655/1361 <sup>9</sup>                                               | 48%                          |
| 10. CSF glucose with concurrent plasma glucose should be sent                                                                                                                                                                             | 607/1,428 <sup>8</sup>                                            | 43%               | 607/1415                                                            | 43%                          |
| 11. CSF protein should be sent                                                                                                                                                                                                            | 1,358/1,428 <sup>8</sup>                                          | 95%               | 1358/1420                                                           | 96%                          |
| 12. Microscopy of the CSF should take place within 2 hours of the lumbar puncture                                                                                                                                                         | 596/1428 <sup>8</sup>                                             | 42%               | 596/1203 <sup>10</sup>                                              | 50%                          |
| 13. CSF for pneumococcal PCR should be sent in all cases of suspected bacterial meningitis                                                                                                                                                | 412/1,428 <sup>8</sup>                                            | 29%               | 412/1418                                                            | 29%                          |
| 14. CSF for Meningococcal PCR should be sent in all cases of suspected bacterial meningitis                                                                                                                                               | 434/1,428 <sup>8</sup>                                            | 30%               | 434/1418                                                            | 31%                          |
| 15. A swab of the posterior nasopharyngeal wall should be obtained as soon as possible, and sent for meningococcal culture, in all cases of suspected meningococcal meningitis/sepsis                                                     | 54/1,471                                                          | 4%                | 54/1463 <sup>11</sup>                                               | 4%                           |
| 16. All patients with meningitis should have an HIV test                                                                                                                                                                                  | 646/1,471                                                         | 44%               | 646/1459 <sup>12</sup>                                              | 44%                          |
| <b>Treatment</b>                                                                                                                                                                                                                          |                                                                   |                   |                                                                     |                              |
| 17. All patients with suspected meningitis or meningococcal sepsis should be given ceftriaxone or cefotaxime                                                                                                                              | 1039/1471 <sup>13</sup>                                           | 71%               | 1039/1423 <sup>14</sup>                                             | 73%                          |
| 18. If the patient has, within the last 6 months, been to a country where penicillin resistant pneumococci are prevalent, IV vancomycin 15-20 mg/kg should be added 12-hourly (or 600 mg rifampicin 12-hourly IV or orally) <sup>15</sup> | See footnote                                                      |                   |                                                                     |                              |

|                                                                                                                                                                                                                                                                                                                                                                                                                                                                                                                                                                                                                                                                                                                                                                                                                                                                                                                                                                                                                                                                                                                                                                                                                                                                                                                                                                                                                                                                                                                                                                                                                                                                                                                                                                                                                                                                                                                                                                                                                                                                                                                                                                                                                                                                                                                                                                                                                                                                                                                                                                                                                                                                                                                                |                       |     |                       |                   |
|--------------------------------------------------------------------------------------------------------------------------------------------------------------------------------------------------------------------------------------------------------------------------------------------------------------------------------------------------------------------------------------------------------------------------------------------------------------------------------------------------------------------------------------------------------------------------------------------------------------------------------------------------------------------------------------------------------------------------------------------------------------------------------------------------------------------------------------------------------------------------------------------------------------------------------------------------------------------------------------------------------------------------------------------------------------------------------------------------------------------------------------------------------------------------------------------------------------------------------------------------------------------------------------------------------------------------------------------------------------------------------------------------------------------------------------------------------------------------------------------------------------------------------------------------------------------------------------------------------------------------------------------------------------------------------------------------------------------------------------------------------------------------------------------------------------------------------------------------------------------------------------------------------------------------------------------------------------------------------------------------------------------------------------------------------------------------------------------------------------------------------------------------------------------------------------------------------------------------------------------------------------------------------------------------------------------------------------------------------------------------------------------------------------------------------------------------------------------------------------------------------------------------------------------------------------------------------------------------------------------------------------------------------------------------------------------------------------------------------|-----------------------|-----|-----------------------|-------------------|
| 19. Those aged 60 or over should receive 2 g IV ampicillin/amoxicillin 4-hourly in addition to a cephalosporin [1B].                                                                                                                                                                                                                                                                                                                                                                                                                                                                                                                                                                                                                                                                                                                                                                                                                                                                                                                                                                                                                                                                                                                                                                                                                                                                                                                                                                                                                                                                                                                                                                                                                                                                                                                                                                                                                                                                                                                                                                                                                                                                                                                                                                                                                                                                                                                                                                                                                                                                                                                                                                                                           | 55/233                | 24% | 55/197 <sup>16</sup>  | 28%               |
| 20. Immunocompromised patients (including diabetics and those with a history of alcohol misuse) should receive 2 g IV ampicillin/amoxicillin 4-hourly in addition to a cephalosporin.                                                                                                                                                                                                                                                                                                                                                                                                                                                                                                                                                                                                                                                                                                                                                                                                                                                                                                                                                                                                                                                                                                                                                                                                                                                                                                                                                                                                                                                                                                                                                                                                                                                                                                                                                                                                                                                                                                                                                                                                                                                                                                                                                                                                                                                                                                                                                                                                                                                                                                                                          | 26/115 <sup>17</sup>  | 23% | 26/99 <sup>18</sup>   | 26%               |
| 21. If there is a clear history of anaphylaxis to penicillins or cephalosporins give IV chloramphenicol 25 mg/kg 6- hourly                                                                                                                                                                                                                                                                                                                                                                                                                                                                                                                                                                                                                                                                                                                                                                                                                                                                                                                                                                                                                                                                                                                                                                                                                                                                                                                                                                                                                                                                                                                                                                                                                                                                                                                                                                                                                                                                                                                                                                                                                                                                                                                                                                                                                                                                                                                                                                                                                                                                                                                                                                                                     | 14/37                 | 38% | 14/30 <sup>19</sup>   | 47%               |
| 22. If <i>Streptococcus pneumoniae</i> is identified continue with IV benzylpenicillin 2.4 g 4 hourly, 2 g ceftriaxone IV 12 hourly or 2 g cefotaxime IV 6-hourly                                                                                                                                                                                                                                                                                                                                                                                                                                                                                                                                                                                                                                                                                                                                                                                                                                                                                                                                                                                                                                                                                                                                                                                                                                                                                                                                                                                                                                                                                                                                                                                                                                                                                                                                                                                                                                                                                                                                                                                                                                                                                                                                                                                                                                                                                                                                                                                                                                                                                                                                                              | 114/172               | 66% | 114/145 <sup>20</sup> | 79%               |
| 23. If <i>N. meningitidis</i> is identified 2 g ceftriaxone IV 12 hourly, 2 g cefotaxime IV 6-hourly or 2.4 benzylpenicillin IV 4-hourly may be given as an alternative                                                                                                                                                                                                                                                                                                                                                                                                                                                                                                                                                                                                                                                                                                                                                                                                                                                                                                                                                                                                                                                                                                                                                                                                                                                                                                                                                                                                                                                                                                                                                                                                                                                                                                                                                                                                                                                                                                                                                                                                                                                                                                                                                                                                                                                                                                                                                                                                                                                                                                                                                        | 52/76                 | 68% | 52/68 <sup>21</sup>   | 76%               |
| 24. If the patient is not treated with ceftriaxone (in meningococcal disease), a single dose of 500 mg ciprofloxacin orally should also be given                                                                                                                                                                                                                                                                                                                                                                                                                                                                                                                                                                                                                                                                                                                                                                                                                                                                                                                                                                                                                                                                                                                                                                                                                                                                                                                                                                                                                                                                                                                                                                                                                                                                                                                                                                                                                                                                                                                                                                                                                                                                                                                                                                                                                                                                                                                                                                                                                                                                                                                                                                               | 0/2                   | 0%  | 0/2                   | 0%                |
| 25. If <i>Listeria monocytogenes</i> is identified Give 2 g ampicillin/amoxicillin IV 4-hourly and continue for at least 21 days. Co-trimoxazole 10-20 mg/kg or chloramphenicol are alternatives in cases of anaphylaxis to beta lactams.                                                                                                                                                                                                                                                                                                                                                                                                                                                                                                                                                                                                                                                                                                                                                                                                                                                                                                                                                                                                                                                                                                                                                                                                                                                                                                                                                                                                                                                                                                                                                                                                                                                                                                                                                                                                                                                                                                                                                                                                                                                                                                                                                                                                                                                                                                                                                                                                                                                                                      | 4/7                   | 57% | 4/6                   | 67% <sup>22</sup> |
| 26. If <i>Haemophilus influenzae</i> is identified continue 2g ceftriaxone IV 12-hourly or 2 g cefotaxime IV 6-hourly for 10 days                                                                                                                                                                                                                                                                                                                                                                                                                                                                                                                                                                                                                                                                                                                                                                                                                                                                                                                                                                                                                                                                                                                                                                                                                                                                                                                                                                                                                                                                                                                                                                                                                                                                                                                                                                                                                                                                                                                                                                                                                                                                                                                                                                                                                                                                                                                                                                                                                                                                                                                                                                                              | 9/14                  | 64% | 9/13                  | 69% <sup>23</sup> |
| 27. 10 mg dexamethasone IV 6 hourly should be started on admission, either shortly before or simultaneously with antibiotics.                                                                                                                                                                                                                                                                                                                                                                                                                                                                                                                                                                                                                                                                                                                                                                                                                                                                                                                                                                                                                                                                                                                                                                                                                                                                                                                                                                                                                                                                                                                                                                                                                                                                                                                                                                                                                                                                                                                                                                                                                                                                                                                                                                                                                                                                                                                                                                                                                                                                                                                                                                                                  | 67/1,471              | 5%  | 67/1435 <sup>24</sup> | 5%                |
| 28. If pneumococcal meningitis is confirmed dexamethasone should be continued for 4 days.                                                                                                                                                                                                                                                                                                                                                                                                                                                                                                                                                                                                                                                                                                                                                                                                                                                                                                                                                                                                                                                                                                                                                                                                                                                                                                                                                                                                                                                                                                                                                                                                                                                                                                                                                                                                                                                                                                                                                                                                                                                                                                                                                                                                                                                                                                                                                                                                                                                                                                                                                                                                                                      | 34/172 <sup>25</sup>  | 20% | 34/158 <sup>26</sup>  | 22%               |
| <b>Critical Care</b>                                                                                                                                                                                                                                                                                                                                                                                                                                                                                                                                                                                                                                                                                                                                                                                                                                                                                                                                                                                                                                                                                                                                                                                                                                                                                                                                                                                                                                                                                                                                                                                                                                                                                                                                                                                                                                                                                                                                                                                                                                                                                                                                                                                                                                                                                                                                                                                                                                                                                                                                                                                                                                                                                                           |                       |     |                       |                   |
| 29. The following patients should be transferred to critical care - those with a rapidly evolving rash, those with a GCS of 12 or less and those with uncontrolled seizures                                                                                                                                                                                                                                                                                                                                                                                                                                                                                                                                                                                                                                                                                                                                                                                                                                                                                                                                                                                                                                                                                                                                                                                                                                                                                                                                                                                                                                                                                                                                                                                                                                                                                                                                                                                                                                                                                                                                                                                                                                                                                                                                                                                                                                                                                                                                                                                                                                                                                                                                                    | 151/203 <sup>27</sup> | 74% | 151/203               | 74%               |
| <b>Notification</b>                                                                                                                                                                                                                                                                                                                                                                                                                                                                                                                                                                                                                                                                                                                                                                                                                                                                                                                                                                                                                                                                                                                                                                                                                                                                                                                                                                                                                                                                                                                                                                                                                                                                                                                                                                                                                                                                                                                                                                                                                                                                                                                                                                                                                                                                                                                                                                                                                                                                                                                                                                                                                                                                                                            |                       |     |                       |                   |
| 30. All cases of meningitis (regardless of aetiology) should be notified to the relevant public health authority                                                                                                                                                                                                                                                                                                                                                                                                                                                                                                                                                                                                                                                                                                                                                                                                                                                                                                                                                                                                                                                                                                                                                                                                                                                                                                                                                                                                                                                                                                                                                                                                                                                                                                                                                                                                                                                                                                                                                                                                                                                                                                                                                                                                                                                                                                                                                                                                                                                                                                                                                                                                               | 236/1,471             | 16% | 236/1465              | 16%               |
| Notes.<br>^Only those audit standards that could be measured from the data collected. *excludes those where there was missing data and/or where not relevant. 1. Only 977 patients had blood cultures taken. 2. Excluding those who did not have blood cultures taken and where data was missing. 3. 1428 patients had a LP. 4. Excludes those who did not have an LP and where data was not available. 5. 82 patients had data consistent with having antibiotics prior to admission, this might be due to confusion about whether admission meant admission to the emergency department or admission to a ward, or it may represent data entry error therefore, these figures are not included. 6. 388 patients did not receive any antibiotics at all. 7. 310 (21%) of patients were admitted under an infection specialist, all others received consulting advice only. 8. 43 people did not have an LP. 9. Missing data on 67. 10. 43 had no LP, 97 missing data, 128 time of microscopy was before or at the same time as the LP. 11. Performed in 15/76 (20%) of proven meningococcal cases. 12. 9 known HIV positive and 3 missing data. 13. 285 patients were not given any antibiotics at all. 14. 48 patients who were definitely given antibiotics had missing data on which antibiotics they were given. 15. Using mainland Europe data only and with reference to ECDC data – 101 patients were documented to have travelled to a mainland European country within the previous 6 months. Travel history was not documented at all in 822 cases (56%). Of the 101 patients who had travelled to mainland Europe 54 (54%) had been to a country with a rate of penicillin resistant pneumococci of >5% (2017 data). 5/52 had no antibiotics. 0/47 had antibiotics to cover for penicillin resistant pneumococci. 16. 233 patients were aged over 60 but only 207 received antibiotics. Missing data for 10, 108 received amoxicillin at some point but only 55 received the correct dose. 17. Not including those >=60. 18. 15 did not received any antibiotics and missing data on 1. 19. 7 patients had no antibiotics at all. 20. 27 patients had insufficient antibiotic data. 21. 8 patient had insufficient antibiotic data. 22. 1 patient had insufficient antibiotic data. 23. Insufficient antibiotic data on 1 person. 24. Missing data on 36 – 11 on whether dexamethasone was received or not, 21 on the dose given and 4 on the timing. 25. Only 18 were given the correct dose (10mg). Some received dexamethasone for longer than 4 days. 26. Missing data on 14 individuals. 27. 7/11 patient with progressing rash, 131/176 patients with GCS <13 and 13/16 patients with uncontrolled seizures. |                       |     |                       |                   |

1  
2  
3 175 Overall in-hospital mortality was 3% and was considerably higher in patients with  
4  
5 176 bacterial meningitis (13%), and pneumococcal meningitis in particular (16%). Mortality in  
6  
7 177 viral meningitis was 0.3% and 1.45% in those with meningitis of unknown aetiology. Just over  
8  
9 178 half (157) of those with confirmed bacterial meningitis required admission to an intensive care  
10  
11 179 unit (ICU).

12  
13  
14  
15 180 *Use of diagnostics*

16 181 A few patients, 43, did not have an LP, of whom 26 (60%) had no contraindication (as  
17  
18 182 specified in the 2016 joint specialties guidelines and shown in box 2). Almost all these patients,  
19  
20 183 who did not have an LP, had either a positive blood culture (36, 84%) or a positive blood PCR  
21  
22 184 test (5, 12%).  
23  
24  
25

26 185  
27  
28 **Box 2: Indications for neuroimaging before**  
29 186 **lumbar puncture (LP) in suspected**  
30 **meningitis.**

- 31 187  
32 (1) Focal neurological signs  
33 (2) Presence of papilloedema  
34 188 (3) Continuous or uncontrolled seizures  
35 (4)  $GCS \leq 12$   
36

37 189  
38  
39  
40 190 Contra-indications for immediate LP were uncommon and occurred in 299 (20%)  
41  
42 191 patients. Glasgow coma score ( $GCS$ )  $\leq 12$  was the most common contra-indication for  
43  
44 192 immediate LP reported in 143 (10%), followed by focal neurological signs in 38 (3%). A  
45  
46 193 further 70 (7%) had other indications to delay LP. Neuroimaging prior to LP happened in 1094  
47  
48 194 of 1158 patients (94%), 911 (83%) of whom had no guideline-specified indication.  
49  
50 195 Neuroimaging was performed a median of 11 hours post arrival at hospital (IQR 4-21). Median  
51  
52 196 time from admission to LP was 16.5 hours (IQR 8 – 27). Only 6 patients had an LP within 1  
53  
54 197 hour of arrival at hospital and only 326 (26%) within 8 hours.  
55  
56  
57  
58  
59  
60

1  
2  
3 198 Median time from LP to CSF microscopy was 2 hours (IQR 1.1-3.2). Time from LP to  
4  
5 199 CSF analysis was significantly quicker when performed at on-site laboratories when compared  
6  
7  
8 200 to centralised laboratory processing (median 1.65 hours (IQR 1.0 - 2.8) compared to 2.95 hours  
9  
10 201 (IQR 2.0 - 3.8)  $p < 0.001$ ).

11  
12 202 Fewer than one third of patients had pneumococcal (412, 28%) and meningococcal  
13  
14 203 polymerase chain reaction (PCR) (434, 29.5%) performed on their CSF. Pneumococcal PCR  
15  
16 204 was done on blood in 211 (14%) patients, and meningococcal PCR in 232 (16%). 646 patients  
17  
18 205 (44%) patients had a documented HIV test. Four of these were positive – two of whom had  
19  
20 206 pneumococcal meningitis, one of whom had enteroviral meningitis and one had meningitis of  
21  
22 207 unknown aetiology. Nine patients were previously known to be HIV positive.

23  
24  
25 208 Blood cultures were taken from 66% (n=977) of patients with 45% (n=438) having  
26  
27 209 them taken within one hour of arrival at hospital.

### 30 210 *Treatment*

31  
32 211 285 patients (19%) did not receive antibiotics, most of whom had either viral meningitis  
33  
34 212 (163) or lymphocytic meningitis with no aetiology identified (105). The remaining 1,186  
35  
36 213 patients received at least one dose of antibiotics. The median time from hospital admission to  
37  
38 214 first dose of antibiotics was 3.2 hours (IQR 1.3,9.2). Amongst the patients who received  
39  
40 215 antibiotics the antimicrobials were commenced within an hour of arrival at hospital for  
41  
42 216 approximately one fifth of patients (207/1000). In confirmed bacterial meningitis cases, 92  
43  
44 217 patients (36%) received antibiotics within an hour of arrival.

45  
46  
47 218 Adherence with guideline specified empirical antibiotic regimens was good with 912  
48  
49 219 (80%) receiving a third-generation cephalosporin. Data is missing on antibiotic type for 47  
50  
51 220 patients. Of the 197 patients aged 60 years and over who received antibiotics, 108 (55%)  
52  
53 221 received ampicillin or amoxicillin; only 55 (28%) of those had the correct dose and dosing  
54  
55 222 frequency as recommended for *Listeria monocytogenes* meningitis. Similarly, only 36 (31%)  
56  
57  
58  
59  
60



1  
2  
3 223 of the immunocompromised patients, who were aged under 60, (n=115) received any  
4  
5 224 ampicillin or amoxicillin for anti-*Listeria* cover. The supplementary table shows details  
6  
7  
8 225 regarding risk factors for *Listeria*.

9  
10 226 Only 300 patients (20%) received adjunctive steroids as recommended. Steroids were  
11  
12 227 given more frequently in patient with confirmed bacterial meningitis in 150 (50%) cases. In  
13  
14 228 patients with pneumococcal meningitis 97 patients (57%) received steroids.

### 15 229 *Clinical outcomes*

16  
17  
18  
19 230 On multivariate analysis, having a confirmed diagnosis of bacterial meningitis was  
20  
21 231 strongly associated with in-hospital mortality. Adjusting for age and sex, confirmed bacterial  
22  
23 232 meningitis was associated with 26 times the odds of in-hospital mortality compared to those  
24  
25 233 with other forms of meningitis (aOR 25.9, 95% CI 5.93 – 113.0), including those with no  
26  
27 234 aetiology identified.

28  
29  
30 235 In patients with confirmed bacterial meningitis, on univariate analyses, in-hospital  
31  
32 236 mortality was associated with a positive blood culture (cOR 2.21, 95% CI 1.04 – 4.67); GCS  $\leq$   
33  
34 237 13 (cOR 3.24, 95% CI 1.39 – 7.52), confirmed *Streptococcus pneumoniae* meningitis (cOR  
35  
36 238 2.37, 95% CI 1.10 – 5.11); and ICU admission (cOR 4.81, 95% CI 1.99 – 11.60). These  
37  
38 239 associations remained despite multivariate adjustment for age and sex (table 3).

39  
40  
41  
42 240  
43  
44  
45  
46  
47  
48  
49  
50  
51  
52  
53  
54  
55  
56  
57  
58  
59  
60

**Table 3: Multivariate analysis of the association between baseline co-variates and in-hospital mortality in 303 patients with confirmed bacterial meningitis using logistic regression modelling:**

| Baseline co-variate                                                  | N   | In-hospital mortality N (%) <sup>1</sup> | Crude OR for in-hospital mortality (95% CI) | P-value | Adjusted OR for in-hospital mortality (95% CI)* | P-value† |
|----------------------------------------------------------------------|-----|------------------------------------------|---------------------------------------------|---------|-------------------------------------------------|----------|
| <b>Sex</b>                                                           |     |                                          |                                             |         |                                                 |          |
| Male                                                                 | 173 | 26 (15.1)                                | 1                                           |         |                                                 |          |
| Female                                                               | 130 | 12 (9.23)                                | 0.57 (0.27-1.18)                            | 0.13    |                                                 |          |
| <b>Age group</b>                                                     |     |                                          |                                             |         |                                                 |          |
| ≤ 18 years                                                           | 18  | 0 (0)                                    |                                             |         |                                                 |          |
| 19 – 59 years                                                        | 159 | 18 (11.3)                                | 1                                           |         |                                                 |          |
| ≥ 60 years                                                           | 126 | 20 (16.0)                                | 1.49 (0.75 – 2.96)                          | 0.25    |                                                 |          |
| <b>Blood culture positive</b>                                        |     |                                          |                                             |         |                                                 |          |
| No                                                                   | 137 | 11 (8.09)                                | 1                                           |         | 1                                               |          |
| Yes                                                                  | 166 | 27 (16.3)                                | 2.21 (1.04 – 4.67)                          | 0.03    | 1.87 (0.87 – 4.01)                              | 0.10     |
| <b>GCS ≤ 13<sup>2</sup></b>                                          |     |                                          |                                             |         |                                                 |          |
| No                                                                   | 124 | 8 (6.45)                                 | 1                                           |         | 1                                               |          |
| Yes                                                                  | 148 | 27 (18.2)                                | 3.24 (1.39 – 7.52)                          | 0.004   | 2.90 (1.26 – 6.71)                              | 0.008    |
| <b>IV dexamethasone given<sup>3</sup></b>                            |     |                                          |                                             |         |                                                 |          |
| No                                                                   | 149 | 23 (15.4)                                | 1                                           |         | 1                                               |          |
| Yes                                                                  | 150 | 14 (9.40)                                | 0.57 (0.27 – 1.16)                          | 0.11    | 0.57 (0.28 – 1.17)                              | 0.12     |
| <b>IV dexamethasone given if <i>Strep.pneumoniae</i><sup>4</sup></b> |     |                                          |                                             |         |                                                 |          |
| No                                                                   | 73  | 16 (21.9)                                | 1                                           |         | 1                                               |          |
| Yes                                                                  | 97  | 11 (11.5)                                | 0.46 (0.20 – 1.08)                          | 0.07    | 0.47 (0.20 – 1.10)                              | 0.08     |
| <b>Final diagnosis <i>S. pneumoniae</i></b>                          |     |                                          |                                             |         |                                                 |          |
| No                                                                   | 131 | 10 (7.63)                                | 1                                           |         | 1                                               |          |
| Yes                                                                  | 172 | 28 (16.4)                                | 2.37 (1.10 – 5.11)                          | 0.02    | 2.08 (0.96 – 4.48)                              | 0.05     |
| <b>ITU admission<sup>5</sup></b>                                     |     |                                          |                                             |         |                                                 |          |
| No                                                                   | 144 | 7 (4.86)                                 | 1                                           |         | 1                                               |          |
| Yes                                                                  | 157 | 31 (19.7)                                | 4.81 (1.99 – 11.60)                         | < 0.001 | 4.28 (1.81 – 10.1)                              | < 0.001  |

\*adjusted for sex and age group

† P-value from LRT comparing models with and without primary exposure variable

1 = One participant had missing outcome data

2 = 31/303 (10%) participants did not have a GCS recorded

3 = 4/303 (1%) participants had missing data on IV dexamethasone administration

4 = 2/172 (1%) participants with confirmed *S. pneumoniae* meningitis had missing data on IV dexamethasone administration

5 = 1/303 (0.3%) participants had missing data on ITU admission

241

242 On both univariate and multivariate analyses (adjusted for age and sex), in patients with  
 243 confirmed bacterial meningitis, the administration of dexamethasone was associated with a  
 244 reduction in in-hospital mortality (aOR 0.57, 95% CI 0.28 – 1.17, p 0.12). When this analysis  
 245 was restricted to include only those with confirmed *Streptococcus pneumoniae* meningitis,  
 246 those who received dexamethasone had a reduced odds of in-hospital mortality (aOR 0.47,  
 247 95% CI 0.20 – 1.10, p 0.08). Neither association reached statistical significance.

## 248 Discussion

249  
250 This large national study evaluated the clinical management of adults with community  
251 acquired meningitis throughout the UK and Ireland. Current practice falls short of the  
252 recommendations in the 2016 UK guidelines(6). This is a concern for all patients but is of a  
253 particular worry in bacterial meningitis. The management of bacterial meningitis is time  
254 critical(4, 14). Delays in receiving antibiotics and having an LP, the unnecessary use of brain  
255 imaging, a lack of appropriate antibiotics in those at risk of *Listeria* and the low rate of steroid  
256 administration are areas for significant improvement.

257 Most patients in this study were given antibiotics prior to LP. Even taking this into  
258 consideration, the median door to antibiotic time was still over three hours. The optimal timing  
259 of antibiotics in bacterial meningitis is not known precisely but we do know that delays lead to  
260 increased mortality (4, 5, 14). A delay of over three hours has previously been associated with  
261 a 14-fold increase risk of death(14).

262 Delays in obtaining CSF are associated with a reduction in pathogen detection,  
263 increased exposure to unnecessary anti-infectives, prolonged hospital stays and increased  
264 mortality (4, 6, 15). In most cases brain imaging is not indicated in adults with suspected  
265 community-acquired meningitis (4) however, in our cohort, a significant number of patients  
266 had unnecessary scans. Although complications following LP are rare(16, 17), there may be an  
267 unfounded fear of cerebral herniation following LP, even in those with no clinical features of  
268 brain shift, which is leading to this excessive use of imaging(18). Education programs, along  
269 with quality improvement measures, are essential to reduce the potentially harmful overuse of  
270 neurological imaging. In addition, it is essential that we optimise meningitis care pathways to  
271 ensure that clinicians have the time, space and equipment required to performed LPs in a timely  
272 and safe manner (3, 19).

1  
2  
3 273 CSF culture positivity rates decline substantially when LP is delayed (3, 15). PCR can  
4  
5 274 detect bacterial DNA in CSF for several days after antibiotics have been administered. In the  
6  
7 275 UK 50% of meningococcal disease is diagnosed on PCR alone(20). Therefore, it is alarming  
8  
9 276 that PCR was used, in our cohort, as a diagnostic modality in so few patients. Meningitis  
10  
11 277 specific investigation order-sets using electronic ordering, and/or reflex laboratory testing to  
12  
13 278 increase use of molecular diagnostics should be considered to reduce opportunities for missed  
14  
15 279 microbiological diagnoses. There is the potential for increased use of rapid technologies that  
16  
17 280 can be used on site with minimal technical skill required(21). Having a rapid tests on site has  
18  
19 281 been shown to reduce bed days with significant cost savings in enteroviral meningitis (22).  
20  
21 282 Further research evaluating rapid diagnostic tests in other types of meningitis with clinically  
22  
23 283 relevant outcomes is needed. We also need to increase the offer of HIV testing in patients with  
24  
25 284 meningitis, as less than half the patients had a documented HIV test. Incident HIV diagnoses  
26  
27 285 were made in our cohort amongst patients presenting with bacterial, viral, and unknown cause  
28  
29 286 meningitis.  
30  
31  
32  
33  
34

35 287 Corticosteroids have been shown to reduce mortality in pneumococcal meningitis (23).  
36  
37 288 We saw a 50% reduction in mortality in patients with pneumococcal meningitis who were  
38  
39 289 given steroids, albeit not reaching statistical significance. It is of concern that well-evidenced,  
40  
41 290 well-established therapies known to improve outcome, including mortality, are only being  
42  
43 291 given to just over half of those who might benefit. A protocolised, goal-directed therapy bundle,  
44  
45 292 including the use of corticosteroids and appropriate antibiotics warrants evaluation in the UK.  
46  
47  
48

49 293 Although this is a large multi-national study, there are some limitations. NHS trusts  
50  
51 294 self-selected themselves for inclusion and we cannot rule out any significant differences with  
52  
53 295 trusts that did not. However, given that 64 hospitals were involved and good representation  
54  
55 296 from throughout the nations of the UK (and Ireland) we don't think this selection bias limits  
56  
57 297 the generalisability of our findings. We used well-established, published case definitions of  
58  
59  
60

1  
2  
3 298 meningitis to minimise information bias, however misclassification of cases remains possible  
4  
5 299 especially in the cases without a confirmed microbiological diagnosis. Our case definitions  
6  
7  
8 300 allowed us to include anyone suspected of having meningitis (of any cause) as objectively it is  
9  
10 301 often difficult to differentiate between viral and bacterial meningitis at the point of initial  
11  
12 302 assessment. However, it is possible that there may have been differences in presentation  
13  
14 303 between those with confirmed bacterial meningitis, those with confirmed viral meningitis and  
15  
16 304 those with no confirmed aetiology that meant they were managed in different ways. This study  
17  
18 305 was not powered to look at the differences between all the different aetiologies. Finally,  
19  
20 306 because this was a retrospective study, our analysis may have been subject to errors resulting  
21  
22 307 from recall bias and missing data. A prospective national study would have been challenging  
23  
24 308 to execute and it is likely that there would have been ascertainment bias in time and geography.  
25  
26 309 We therefore believe that, due the large sample size along with the use of electronic hospital  
27  
28 310 coding and laboratory data to ascertain cases, the risk of recall bias is low, and our retrospective  
29  
30 311 data is representative of practice within the UK.

31  
32  
33  
34  
35 312 In conclusion this is, to our knowledge, the largest UK study of adult patients with  
36  
37 313 meningitis. Awareness of practice guidelines for relatively rare acute medical conditions such  
38  
39 314 as meningitis is low and this study has demonstrated that despite clear, freely accessible  
40  
41 315 guidelines, clinical care is not in line with evidence-based recommendations. There is  
42  
43 316 considerable room for improvement. Whilst we recognise that guidelines do not improve  
44  
45 317 practice on their own, we do recommend that the findings from this study are strongly  
46  
47 318 considered in the development of the new National Institute for Clinical Excellence (NICE)  
48  
49 319 guideline on meningitis currently being developed, which for the first time, will include adults  
50  
51 320 as well as children. Given the widespread adoption of NICE endorsed guidelines and quality  
52  
53 321 standards to improve the quality of clinical practice, we anticipate that a NICE guideline will  
54  
55 322 improve awareness and uptake of good practice in the short term. In addition to education,  
56  
57  
58  
59  
60

1  
2  
3 323 which has limited impact on changing behaviour, UK hospitals should use quality improvement  
4  
5 324 methods to improve management of patients with suspected meningitis. We suggest a national  
6  
7 325 strategic improvement plan should focus on the following key areas: timely use of diagnostics;  
8  
9 326 appropriate antibiotics in at risk populations and the use of adjunctive steroids. The integrated  
10  
11 327 use of electronic systems to standardize optimal use of diagnostics, and management bundles  
12  
13 328 may offer additional opportunities to improve outcomes. Each site that has been involved in  
14  
15 329 this study has been asked to implement site specific changes and re-evaluate for any  
16  
17 330 improvements in practice.  
18  
19  
20  
21  
22  
23  
24  
25  
26  
27  
28  
29  
30  
31  
32  
33  
34  
35  
36  
37  
38  
39  
40  
41  
42  
43  
44  
45  
46  
47  
48  
49  
50  
51  
52  
53  
54  
55  
56  
57  
58  
59  
60

1  
2  
3  
4 332 Author contributions

5 333 Ellis J: Methodology, Data collection and curation, formal analysis, Investigation, Writing –  
6  
7 334 Original Draft Preparation. Harvey D: Methodology including pilot data, data collection,  
8  
9 335 reviewing and approving final draft. Defres S: Methodology including development of original  
10  
11 336 audit tool and guidelines, data collection, reviewing and approving final draft. Chandna A:  
12  
13 337 Methodology, reviewing and approving final draft. Maclachlan E: Methodology, data  
14  
15 338 collection, reviewing and approving final draft. Solomon T: Methodology including  
16  
17 339 development of original guidelines and audit tool, reviewing and approving final draft.  
18  
19 340 Heyderman RS: Conceptualization, Methodology, Supervision, Writing – Review & Editing.  
20  
21 341 McGill F: Conceptualization, Methodology, Data collection and curation, Investigation, formal  
22  
23 342 analysis, Writing –Original Draft Preparation. Responsible for overall content as guarantor.  
24  
25 343 The corresponding author attests that all listed authors meet authorship criteria and that no  
26  
27 344 others meeting the criteria have been omitted.

28  
29 345  
30  
31 346 The Corresponding Author has the right to grant on behalf of all authors and does grant on  
32  
33 347 behalf of all authors, a worldwide licence to the Publishers and its licensees in perpetuity, in  
34  
35 348 all forms, formats and media (whether known now or created in the future), to i) publish,  
36  
37 349 reproduce, distribute, display and store the Contribution, ii) translate the Contribution into other  
38  
39 350 languages, create adaptations, reprints, include within collections and create summaries,  
40  
41 351 extracts and/or, abstracts of the Contribution, iii) create any other derivative work(s) based on  
42  
43 352 the Contribution, iv) to exploit all subsidiary rights in the Contribution, v) the inclusion of  
44  
45 353 electronic links from the Contribution to third party material where-ever it may be located; and,  
46  
47 354 vi) licence any third party to do any or all of the above.

48  
49 355  
50  
51 356  
52  
53 357 Competing interests: All authors have completed the ICMJE uniform disclosure form  
54  
55 358 at [www.icmje.org/coi\\_disclosure.pdf](http://www.icmje.org/coi_disclosure.pdf) and declare: no support from any organisation for the  
56  
57 359 submitted work; no financial relationships with any organisations that might have an interest  
58  
59 360 in the submitted work in the previous three years; no other relationships or activities that  
60  
61 361 could appear to have influenced the submitted work.

62  
63 362 The lead author and corresponding author affirm that the manuscript is an honest, accurate,  
64  
65 363 and transparent account of the study; no important aspects of the study have been omitted.

66  
67 364 Original data can be shared on request.

1  
2  
3  
4 366 Acknowledgements

5 367 TS is supported by the National Institute for Health Research (NIHR) Health Protection  
6  
7 368 Research Unit in Emerging and Zoonotic Infections (Grant No. NIHR200907), NIHR Global  
8  
9 369 Health Research Group on Brain Infections (No. 17/63/110), and the UK Medical Research  
10 370 Council's Global Effort on COVID-19 Programme (MR/V033441/1)

11  
12 371

13  
14 372 Funding

15 373 This research received no specific grant from any funding agency in the public, commercial  
16  
17 374 or not-for-profit sector.

18  
19 375

20 376 Data Availability Statement

21  
22 377 Data can be made available to other researchers on reasonable request to the authors.

23  
24 378  
25  
26  
27  
28  
29  
30  
31  
32  
33  
34  
35  
36  
37  
38  
39  
40  
41  
42  
43  
44  
45  
46  
47  
48  
49  
50  
51  
52  
53  
54  
55  
56  
57  
58  
59  
60



## 379 List of contributors in NAMM

380

| Site of Data collection                                                              | Names and Grades (at time of data collection) of contributors | Number of patients' data contributed |
|--------------------------------------------------------------------------------------|---------------------------------------------------------------|--------------------------------------|
| Birmingham Heartlands Hospital, University Hospitals Birmingham NHS Foundation Trust | Amy Chue, SpR<br>Ed Moran, Consultant<br>Karishma Gokani, CMT | 60                                   |
| North Manchester General Hospital                                                    | Joseph Thompson, SpR                                          | 54                                   |
| North Manchester General Hospital                                                    | Katherine Ajdukiewicz, Consultant                             | 54                                   |
| Oxford University Hospitals                                                          | Victoria Ward, SpR                                            | 50                                   |
| Oxford University Hospitals                                                          | Lucinda Barrett, Consultant                                   | 50                                   |
| Cheltenham General Hospital                                                          | Frances Edwards, CMT                                          | 47                                   |
| Cheltenham General Hospital                                                          | Adam Usher, Consultant                                        | 47                                   |
| Royal Alexandra Hospital, Paisley                                                    | Mairi McLeod, Consultant                                      | 45                                   |
| Royal Alexandra Hospital, Paisley                                                    | Ramandeep Singh, medical student                              | 45                                   |
| Royal Alexandra Hospital, Paisley                                                    | Su su Htwe, SpR                                               | 45                                   |
| Leicester Royal Infirmary, Leicester                                                 | Benedict Rogers, SpR                                          | 42                                   |
| Leicester Royal Infirmary, Leicester                                                 | Grace Duane, Medical Student                                  | 42                                   |
| Leicester Royal Infirmary, Leicester                                                 | Martin Wiselka, Consultant                                    | 42                                   |
| Leicester Royal Infirmary, Leicester                                                 | Nicholas Wong, SpR                                            | 42                                   |
| NHS Lothian                                                                          | Elen Vink, SpR                                                | 42                                   |
| NHS Lothian                                                                          | Jennifer Poyner, SpR                                          | 42                                   |
| NHS Lothian                                                                          | Jenni Crane, Consultant                                       | 42                                   |
| NHS Lothian                                                                          | Ollie Lloyd, SpR                                              | 42                                   |
| NHS Lothian                                                                          | Emma Chisholm, SpR                                            | 42                                   |
| Countess of Chester Hospital                                                         | Ildiko Kustos, Consultant                                     | 40                                   |
| Countess of Chester Hospital                                                         | Ruth McEwen, Consultant                                       | 40                                   |
| Countess of Chester Hospital                                                         | Sam Sutton, CMT                                               | 40                                   |
| University Hospitals Plymouth Trust                                                  | Lewis Jones, Consultant                                       | 38                                   |
| University Hospitals Plymouth Trust                                                  | Robert Tilley, Consultant                                     | 38                                   |
| Addenbrookes hospital, Cambridge University Hospitals NHS Foundation Trust           | M. Estee Torok, Honorary Consultant                           | 37                                   |
| Addenbrookes hospital, Cambridge University Hospitals NHS Foundation Trust           | Isobel Ramsay, SpR                                            | 37                                   |
| Hull University Teaching Hospitals NHS Trust                                         | Monica Ivan, Consultant                                       | 36                                   |
| Hull University Teaching Hospitals NHS Trust                                         | Joshua York                                                   | 36                                   |
| Hull University Teaching Hospitals NHS Trust                                         | Jennifer Ansett                                               | 36                                   |
| Hull University Teaching Hospitals NHS Trust                                         | Maithili Varadarajan                                          | 36                                   |
| Hull University Teaching Hospitals NHS Trust                                         | Celestine Eshiwe, SpR                                         | 36                                   |
| London King's College                                                                | Amanda Fife, Consultant                                       | 36                                   |
| London King's College                                                                | Stephanie Harris, SpR                                         | 36                                   |
| London King's College                                                                | Ryan Jayesinghe, medical student                              | 36                                   |
| London King's College                                                                | Priya Sekhon                                                  | 36                                   |
| Aintree University Hospital, Liverpool                                               | James Cruise, SpR                                             | 35                                   |
| Aintree University Hospital, Liverpool                                               | Susan Larkin, Consultant                                      | 35                                   |
| Worcestershire Royal Hospital                                                        | Shivani Kanabar, Medical student                              | 35                                   |
| Worcestershire Royal Hospital                                                        | Ernest Mutengesa, Medical Student                             | 35                                   |
| Worcestershire Royal Hospital                                                        | Mirella Ling, Consultant                                      | 35                                   |

|    |                                                                            |                                       |    |
|----|----------------------------------------------------------------------------|---------------------------------------|----|
| 1  |                                                                            |                                       |    |
| 2  |                                                                            |                                       |    |
| 3  | Worcestershire Royal Hospital                                              | Christopher Green, Consultant         | 35 |
| 4  | Bristol Royal Infirmary, University Hospitals Bristol NHS Foundation Trust | Martin Williams, Consultant           | 33 |
| 5  | Bristol Royal Infirmary, University Hospitals Bristol NHS Foundation Trust | Matthew Stevens, CMT                  | 33 |
| 6  | Bristol Royal Infirmary, University Hospitals Bristol NHS Foundation Trust | Matthew Stevens, CMT                  | 33 |
| 7  | Victoria hospital, Kirkcaldy                                               | David Griffith, Consultant            | 32 |
| 8  | Victoria hospital, Kirkcaldy                                               | David Griffith, Consultant            | 32 |
| 9  | Victoria hospital, Kirkcaldy                                               | Naomi Bulteel, SpR                    | 32 |
| 10 | Northumbria Healthcare NHS Foundatio Trust                                 | Charlotte Milne, SpR                  | 30 |
| 11 | Northumbria Healthcare NHS Foundatio Trust                                 | Jayanta Sarma, Consultant             | 30 |
| 12 | Northumbria Healthcare NHS Foundatio Trust                                 | Jayanta Sarma, Consultant             | 30 |
| 13 | Ninewells hospital, Dundee                                                 | Aline Wilson, SpR                     | 29 |
| 14 | Ninewells hospital, Dundee                                                 | John Shone, Consultant                | 29 |
| 15 | Ninewells hospital, Dundee                                                 | Lynn Urquhart, Consultant             | 29 |
| 16 | Ninewells hospital, Dundee                                                 | Lynn Urquhart, Consultant             | 29 |
| 17 | Ninewells hospital, Dundee                                                 | Sahar Eldirdiri, SpR                  | 29 |
| 18 | Royal Preston Hospital, Lancashire Teaching Hospitals NHS Foundation Trust | Alison Muir, Consultant               | 28 |
| 19 | Royal Preston Hospital, Lancashire Teaching Hospitals NHS Foundation Trust | Alison Muir, Consultant               | 28 |
| 20 | Royal Preston Hospital, Lancashire Teaching Hospitals NHS Foundation Trust | Leila White, Clinical Scientist       | 28 |
| 21 | Sheffield teaching Hospitals                                               | Jody Aberdein, Consultant             | 28 |
| 22 | Sheffield teaching Hospitals                                               | Jody Aberdein, Consultant             | 28 |
| 23 | Sheffield teaching Hospitals                                               | Phillip Simpson, SpR                  | 28 |
| 24 | Shrewbury and Telford Hospital NHS Trust                                   | Hnin Hay Mar                          | 26 |
| 25 | Shrewbury and Telford Hospital NHS Trust                                   | John Bowen                            | 26 |
| 26 | Shrewbury and Telford Hospital NHS Trust                                   | Keying Tan                            | 26 |
| 27 | Shrewbury and Telford Hospital NHS Trust                                   | Keying Tan                            | 26 |
| 28 | Shrewbury and Telford Hospital NHS Trust                                   | Eint Shwe Zin thein                   | 26 |
| 29 | Shrewbury and Telford Hospital NHS Trust                                   | Eint Shwe Zin thein                   | 26 |
| 30 | Shrewbury and Telford Hospital NHS Trust                                   | Mahmoud Aziz                          | 26 |
| 31 | University Hospital North Midlands                                         | Anthony Cadwgan, Consultant           | 25 |
| 32 | University Hospital North Midlands                                         | Brendan Davies, Consultant            | 25 |
| 33 | University Hospital North Midlands                                         | Daniel White, SpR                     | 25 |
| 34 | University Hospital North Midlands                                         | Natasha Weston, SpR                   | 25 |
| 35 | University Hospital North Midlands                                         | Salman Zeb, CMT                       | 25 |
| 36 | St George's Hospital, London                                               | Angela Houston, Consultant            | 24 |
| 37 | St George's Hospital, London                                               | Imogen Fordham, clinical fellow       | 24 |
| 38 | St George's Hospital, London                                               | Imogen Fordham, clinical fellow       | 24 |
| 39 | St George's Hospital, London                                               | Terry John Evans, SpR                 | 24 |
| 40 | St George's Hospital, London                                               | Terry John Evans, SpR                 | 24 |
| 41 | St George's Hospital, London                                               | Louise Wootton, Physician's associate | 24 |
| 42 | Nottingham University Hospitals NHS Trust                                  | David Turner, Consultant              | 24 |
| 43 | Nottingham University Hospitals NHS Trust                                  | David Turner, Consultant              | 24 |
| 44 | Nottingham University Hospitals NHS Trust                                  | Iona Willingham, SpR                  | 24 |
| 45 | Birmingham Queen Elizabeth Hospital                                        | Aimee Johnson, SpR                    | 23 |
| 46 | Birmingham Queen Elizabeth Hospital                                        | Nimal Wickramasinghe, Consultant      | 23 |
| 47 | Birmingham Queen Elizabeth Hospital                                        | Nimal Wickramasinghe, Consultant      | 23 |
| 48 | Salford Royal Infirmary, Salford                                           | Ashley Horsley, SpR                   | 23 |
| 49 | Salford Royal Infirmary, Salford                                           | Ashley Horsley, SpR                   | 23 |
| 50 | Salford Royal Infirmary, Salford                                           | Eamonn Trainor, Consultant            | 23 |
| 51 | Salford Royal Infirmary, Salford                                           | Olivier Gaillemin, Consultant         | 23 |
| 52 | University Hospital Southampton NHS Foundation Trust                       | Andrew Rosser, Consultant             | 23 |
| 53 | University Hospital Southampton NHS Foundation Trust                       | Andrew Rosser, Consultant             | 23 |
| 54 | University Hospital Southampton NHS Foundation Trust                       | Nicholas J Norton, SpR                | 23 |
| 55 | Royal Blackburn Hospital, East Lancashire Hospitals NHS Trust              | Iain Crossingham, Consultant          | 22 |
| 56 | Royal Blackburn Hospital, East Lancashire Hospitals NHS Trust              | Katie Cheung, Medical Student         | 22 |
| 57 | Royal Blackburn Hospital, East Lancashire Hospitals NHS Trust              | Katie Cheung, Medical Student         | 22 |
| 58 | Royal Blackburn Hospital, East Lancashire Hospitals NHS Trust              | Megan Duxbury, CMT                    | 22 |
| 59 | Queen Elizabeth University Hospital, NHS Greater Glasgow and Clyde         | Ashutosh Deshpande, Consultant        | 22 |
| 60 | Queen Elizabeth University Hospital, NHS Greater Glasgow and Clyde         | Ashutosh Deshpande, Consultant        | 22 |
| 61 | Queen Elizabeth University Hospital, NHS Greater Glasgow and Clyde         | Emilie Bellhouse, FY2                 | 22 |
| 62 | Queen Elizabeth University Hospital, NHS Greater Glasgow and Clyde         | Kamaljit Khalsa, SpR                  | 22 |

|    |                                                |                                        |    |
|----|------------------------------------------------|----------------------------------------|----|
| 1  |                                                |                                        |    |
| 2  |                                                |                                        |    |
| 3  | Imperial College School of Medicine            | Helena Brezovjakova, Medical Student   | 22 |
| 4  | Imperial College School of Medicine            | Emma McLean, medical student           | 22 |
| 5  | Imperial college healthcare NHS trust          | Tanmay, Kanitkar, CMT                  | 22 |
| 6  | Imperial college healthcare NHS trust          | Nicholas Davies, Consultant            | 22 |
| 7  | Imperial College School of Medicine            | Alexsander Dawidziuk, Medical Student  | 22 |
| 8  | St James University hospital, Leeds            | Eloisa Mclaughlin, Medical student     | 22 |
| 9  | St James University hospital, Leeds            | Joanna Allen, Consultant               | 22 |
| 10 | St James University hospital, Leeds            | Razan Saman, SpR                       | 22 |
| 11 | St James University hospital, Leeds            | Sarah Kelly, SpR                       | 22 |
| 12 | Royal Liverpool University Hospital, Liverpool | Hugh Adler, SpR                        | 22 |
| 13 | Royal Liverpool University Hospital, Liverpool | Sylviane Defres, Consultant            | 22 |
| 14 | Arrowe Park Hospital, Wirral                   | David Harvey, Consultant               | 21 |
| 15 | Arrowe Park Hospital, Wirral                   | Elshadai Ejere, FY2                    | 21 |
| 16 | Queen's hospital, Romford                      | Aarti Shah, Consultant                 | 21 |
| 17 | Queen's hospital, Romford                      | Yiwen Soo, FY1                         | 21 |
| 18 | Raigmore Hospital, Inverness                   | Wendy Beadles, Consultant              | 21 |
| 19 | Raigmore Hospital, Inverness                   | Heather Sturgeon, Medical student      | 21 |
| 20 | Raigmore Hospital, Inverness                   | Brodie Cameron, Medical Student        | 21 |
| 21 | James Cook University Hospital, Middlesbrough  | Ben Tomlinson, SpR                     | 20 |
| 22 | James Cook University Hospital, Middlesbrough  | David Chadwick, Consultant             | 20 |
| 23 | University Hospital Monklands                  | Claire McGoldrick, Consultant          | 20 |
| 24 | University Hospital Monklands                  | Katie McDowell, FY2                    | 20 |
| 25 | Cumberland infirmary, Carlisle                 | Alastair Miller, Consultant            | 19 |
| 26 | Cumberland infirmary, Carlisle                 | Clive Graham, Consultant               | 19 |
| 27 | Cumberland infirmary, Carlisle                 | Mpho Molosiwa, FY2                     | 19 |
| 28 | Newcastle Upon Tyne NHS Foundation Trust       | Ewan Hunter, Consultant                | 19 |
| 29 | Newcastle Upon Tyne NHS Foundation Trust       | Ruth Owen, Medical Student             | 19 |
| 30 | Newcastle Upon Tyne NHS Foundation Trust       | Katherine Flack                        | 19 |
| 31 | Airedale hospital, Airedale                    | Adrian Kennedy, Consultant             | 18 |
| 32 | Bradford Royal Infirmary, Bradford             | Amy Robinson, Consultant               | 16 |
| 33 | Bradford Royal Infirmary                       | Phoebe Cross, SpR                      | 16 |
| 34 | Bradford Royal Infirmary                       | Fay Perry                              | 16 |
| 35 | University Hospital Wales                      | Vithusha Inpadhas                      | 16 |
| 36 | Aberdeen Royal Infirmary                       | Ali Khan, SpR                          | 15 |
| 37 | Aberdeen Royal Infirmary                       | Sarathy Selvam, FY2                    | 15 |
| 38 | Aberdeen Royal Infirmary                       | Vhairi Bateman, Consultant             | 15 |
| 39 | Aberdeen Royal Infirmary                       | Jeremy Wong, Medica Student            | 15 |
| 40 | Lancaster Royal Infirmary                      | Henry Wu, FY2                          | 15 |
| 41 | Lancaster Royal Infirmary                      | Monika Pasztor, Consultant             | 15 |
| 42 | Whittington Hospital, London                   | Trupti Patel, Consultant               | 14 |
| 43 | Whittington Hospital, London                   | Ajanthiha Karunakaran, Medical Student | 14 |
| 44 | Russells Hall Hospital, Dudley                 | Basma Soliman, CT1                     | 13 |
| 45 | Russells Hall Hospital, Dudley                 | Hassan Paraiso, Consultant             | 13 |
| 46 | Glasgow Royal Infirmary                        | Mairi McLeod, Consultant               | 13 |
| 47 | Glasgow Royal Infirmary                        | Su su Htwe, SpR                        | 13 |
| 48 | Glasgow Royal Infirmary                        | Anna Smith                             | 13 |
| 49 |                                                |                                        |    |
| 50 |                                                |                                        |    |
| 51 |                                                |                                        |    |
| 52 |                                                |                                        |    |
| 53 |                                                |                                        |    |
| 54 |                                                |                                        |    |
| 55 |                                                |                                        |    |
| 56 |                                                |                                        |    |
| 57 |                                                |                                        |    |
| 58 |                                                |                                        |    |
| 59 |                                                |                                        |    |
| 60 |                                                |                                        |    |

|    |                                                                 |                                  |    |
|----|-----------------------------------------------------------------|----------------------------------|----|
| 1  |                                                                 |                                  |    |
| 2  |                                                                 |                                  |    |
| 3  | James Paget University Hospitals NHS Foundation Trust           | Andrew Blanshard, CMT            | 12 |
| 4  | James Paget University Hospitals NHS Foundation Trust           | Harish Reddy, Consultant         | 12 |
| 5  | Portsmouth Hospitals University NHS Trust                       | Avneet Shahi, SpR                | 12 |
| 6  | Portsmouth Hospitals University NHS Trust                       | Helen Chesterfield, Consultant   | 12 |
| 7  | Portsmouth Hospitals University NHS Trust                       | Oliver Bannister, CMT            | 12 |
| 8  | Portsmouth Hospitals University NHS Trust                       | Oliver Bannister, CMT            | 12 |
| 9  | Withybush hospital, Haverford West                              | Ben Schroeder, Medical Student   | 12 |
| 10 | Withybush hospital, Haverford West                              | Ken Woodhouse, Consultant        | 12 |
| 11 | Ashford and St Peter's NHS Foundation Trust                     | Jan Coebergh, Consultant         | 11 |
| 12 | Ashford and St Peter's NHS Foundation Trust                     | Jan Coebergh, Consultant         | 11 |
| 13 | Ashford and St Peter's NHS Foundation Trust                     | Viva Levee, FY2                  | 11 |
| 14 | Mater Misericordiae University Hospital, Dublin                 | Eavan Muldoon, Consultant        | 11 |
| 15 | Mater Misericordiae University Hospital, Dublin                 | Rhea O'regan, SPR                | 11 |
| 16 | Mater Misericordiae University Hospital, Dublin                 | Rhea O'regan, SPR                | 11 |
| 17 | Mater Misericordiae University Hospital, Dublin                 | Tee Keat Teoh, SpR               | 11 |
| 18 | Newham Hospital, Barts Health NHS Trust                         | Sathyavani Subbarao, SpR         | 11 |
| 19 | Newham Hospital, Barts Health NHS Trust                         | Sathyavani Subbarao, SpR         | 11 |
| 20 | Newham Hospital, Barts Health NHS Trust                         | Simon Tiberi, Consultant         | 11 |
| 21 | Newham Hospital, Barts Health NHS Trust                         | Caryn Rosmarin                   | 11 |
| 22 | London UCL and Hospital for Tropical diseases at University     | Jayne Ellis, SpR                 | 10 |
| 23 | College London Hospitals NHS Foundation Trust.                  | Jayne Ellis, SpR                 | 10 |
| 24 | London UCL and Hospital for Tropical diseases at University     | Lucy Bell, CMT                   | 10 |
| 25 | College London Hospitals NHS Foundation Trust.                  | Lucy Bell, CMT                   | 10 |
| 26 | London UCL and Hospital for Tropical diseases at University     | Robert Heyderman, Consultant     | 10 |
| 27 | College London Hospitals NHS Foundation Trust.                  | Robert Heyderman, Consultant     | 10 |
| 28 | Barts Health NHS Trust                                          | Jonathan Lambourne, Consultant   | 10 |
| 29 | Barts Health NHS Trust                                          | Jonathan Lambourne, Consultant   | 10 |
| 30 | Barts Health NHS Trust                                          | Emma McGuire, SpR                | 10 |
| 31 | Guy's and St Thomas' NHS Foundation Trust                       | Robert Serafino, Consultant      | 10 |
| 32 | Guy's and St Thomas' NHS Foundation Trust                       | Anna Goodman, Consultant         | 9  |
| 33 | Guy's and St Thomas' NHS Foundation Trust                       | Ishaan Bhide, FY1                |    |
| 34 | Guy's and St Thomas' NHS Foundation Trust                       | Karanjeet Sagoo, Medical Student |    |
| 35 | Whipps Cross, Barte Health NHS Trust                            | Mark Melzer, Consultant          | 8  |
| 36 | Whipps Cross, Barte Health NHS Trust                            | Mark Melzer, Consultant          | 8  |
| 37 | Whipps Cross, Barte Health NHS Trust                            | Maria Krutikov, SpR              | 8  |
| 38 | The Royal Free Hospital, London                                 | Indran Balakrishnan, Consultant  | 6  |
| 39 | The Royal Free Hospital, London                                 | Susan Hopkins, Consultant        | 6  |
| 40 | The Royal Free Hospital, London                                 | Susan Hopkins, Consultant        | 6  |
| 41 | Trafford General Hospital, Manchester University NHS Foundation | Tim Jones, SpR                   | 6  |
| 42 | Trust                                                           | Kajal Patel, Medical Student     | 4  |
| 43 | Trafford General Hospital, Manchester University NHS Foundation | Barzo Faris, Consultant          |    |
| 44 | Trust                                                           | Barzo Faris, Consultant          |    |
| 45 | William Harvey Hospital, East Kent                              | Graeme Calver, Consultant        | 3  |
| 46 | William Harvey Hospital, East Kent                              | Ricky Singh, Medical Student     | 3  |
| 47 | William Harvey Hospital, East Kent                              | Hazel Sanghvi, Medical Student   | 3  |
| 48 | Tameside General Hospital                                       | Mohamed Eltayeb, Clinical Fellow | 2  |
| 49 | Tameside General Hospital                                       | Rathur Haris, Consultant         | 2  |

381

382

## References

1. van de Beek D, de Gans J, Spanjaard L, Weisfelt M, Reitsma JB, Vermeulen M. Clinical Features and Prognostic Factors in Adults with Bacterial Meningitis. *N Engl J Med*. 2004;351:1849-59.
2. Okike IO, Ribeiro S, Ramsay M, Heath PT, Sharland M, Ladhani SN. Trends in bacterial, mycobacterial and fungal meningitis in England and Wales 2004-11: an observational study. *Lancet Infect Dis*. 2014;14:301-7.
3. McGill F, Griffiths MJ, Bonnett LJ, Geretti AM, Michael BD, Beeching NJ, et al. Incidence, aetiology, and sequelae of viral meningitis in UK adults: a multicentre prospective observational cohort study. *Lancet Infect Dis*. 2018;18(9):992-1003.
4. Proulx N, Frechette D, Toye B, Chan J, Kravcik S. Delays in the administration of antibiotics are associated with mortality from acute bacterial meningitis. *QJM*. 2005;98:291-8.
5. Bodilsen J, Dalager-Pedersen M, Schonheyder HC, Nielsen H. Time to antibiotic therapy and outcome in bacterial meningitis: a Danish population-based cohort study. *BMC Infect Dis*. 2016;16(392):1-7.
6. McGill F, Heyderman RS, Michael BD, Defres S, Beeching NJ, Borrow R, et al. The UK joint specialist societies guideline on the diagnosis and management of acute meningitis and meningococcal sepsis in immunocompetent adults. *J Infect*. 2016;72(4):405-38.
7. Stockdale AJ, Weekes MP, Aliyu SH. An audit of acute bacterial meningitis in a large teaching hospital 2005-10. *QJM*. 2011;104(12):1055-63.
8. Cullen MM. An audit of the investigation and initial management of adults presenting with possible bacterial meningitis. *J Infect*. 2005;50:120-4.
9. Brouwer M, van de Beek D. Viral meningitis in the UK: time to speed up. *Lancet Infectious Diseases*. 2018;18(9):930-1.
10. Kadambari S, Okike I, Ribeiro S, Ramsay ME, Heath PT, Sharland M, et al. Seven-fold increase in viral meningo-encephalitis reports in England and Wales during 2004-2013. *J Infect*. 2014;69(4):326-32.
11. Glimåker M, Johansson B, Grindborg Ö, Bottai M, Lindquist L, Sjölin J. Adult Bacterial Meningitis: Earlier Treatment and Improved Outcome Following Guideline Revision Promoting Prompt Lumbar Puncture. *Clin Infect Dis*. 2015;60(8):1162-9.
12. Public Health England. UK Standards for Microbiology Investigations. Investigation of Cerebrospinal fluid. 2017.
13. The Kings Fund. NHS hospital bed numbers: past, present, future 2021 [Available from: <https://www.kingsfund.org.uk/publications/nhs-hospital-bed-numbers>].
14. Auburtin M, Wolff M, Charpentier J, Varon E, Tulzo YL, Girault C, et al. Detrimental role of delayed antibiotic administration and penicillin-nonsusceptible strains in adult intensive care unit patients with pneumococcal meningitis: The PNEUMOREA prospective multicenter study. *Crit Care Medicine*. 2006;34:2758-65.
15. Michael B, Menezes BF, Cunniffe J, Miller A, Kneen R, Francis G, et al. Effect of delayed lumbar punctures on the diagnosis of acute bacterial meningitis in adults. *Emerg Med J*. 2010;27(6):433-8.
16. Costerus JM, Brouwer MC, Sprengers MES, Roosendaal SD, van der Ende A, van de Beek D. Cranial Computed Tomography, Lumbar Puncture, and Clinical Deterioration in Bacterial Meningitis: A Nationwide Cohort Study. *Clin Infect Dis*. 2018;67(6):920-6.
17. Costerus JM, Brouwer MC, van de Beek D. Technological advances and changing indications for lumbar puncture in neurological disorders. *Lancet Neurol* 2018;17(3):268-78.
18. Glimaker M, Johansson B, Bell M, Ericsson M, Blackberg J, Brink M, et al. Early Lumbar Puncture in adult bacterial meningitis - rationale for revised guidelines. *Scand J Infect Dis*. 2013;45:657-63.
19. Defres S, Mayer J, Backman R, Kneen R. Performing lumbar punctures for suspected CNS infections: experience and practice of trainee doctors. *Br J Hosp Med*. 2015;76(11):658-62.

- 1  
2  
3 435 20. Heinsbroek E, Ladhani SN, Gray S, Guiver M, Kaczmarski E, Borrow R, et al. Added value of  
4 436 PCR testing for confirmation of invasive meningococcal disease in England. *J Infect.* 2013;67:385-90.  
5 437 21. Bouzid D, Zanella MC, Kerneis S, Visseaux B, May L, Schrenzel J, et al. Rapid diagnostic tests  
6 438 for infectious diseases in the emergency department. *Clinical microbiology and infection : the official  
7 439 publication of the European Society of Clinical Microbiology and Infectious Diseases.* 2020.  
8 440 22. Giuleri SG, Chapuis-Taillard C, Manuel O, Hugli O, Pinget C, Wasserfallen JB, et al. Rapid  
9 441 detection of enterovirus in cerebrospinal fluid by a fully automated PCR assay is associated with  
10 442 improved management of aseptic meningitis in adult patients. *J Clin Virol.* 2015;62:58-62.  
11 443 23. de Gans J, van de Beek D, European Dexamethasone in Adulthood Bacterial Meningitis Study  
12 444 Investigators. Dexamethasone in Adults with Bacterial Meningitis. *N Engl J Med.* 2002;347(20):1549-  
13 445 56.  
14  
15  
16 446

17  
18  
19  
20  
21  
22  
23  
24  
25  
26  
27  
28  
29  
30  
31  
32  
33  
34  
35  
36  
37  
38  
39  
40  
41  
42  
43  
44  
45  
46  
47  
48  
49  
50  
51  
52  
53  
54  
55  
56  
57  
58  
59  
60

For peer review only

1  
2  
3  
4  
5  
6  
7  
8  
9  
10  
11  
12  
13  
14  
15  
16  
17  
18  
19  
20  
21  
22  
23  
24  
25  
26  
27  
28  
29  
30  
31  
32  
33  
34  
35  
36  
37  
38  
39  
40  
41  
42  
43  
44  
45  
46  
47  
48  
49  
50  
51  
52  
53  
54  
55  
56  
57  
58  
59  
60

447

For peer review only

## Supplementary table.

Supplementary table . Risk factors for Listeria stratified by aetiology.

|                                                        | <b>Total cohort</b> | <b>Bacterial meningitis</b> | <b>Viral meningitis</b> | <b>Other meningitis<sup>†</sup></b> | <b>P value</b> |
|--------------------------------------------------------|---------------------|-----------------------------|-------------------------|-------------------------------------|----------------|
|                                                        | <b>N (%)</b>        | <b>N (%)</b>                | <b>N (%)</b>            | <b>N (%)</b>                        |                |
| <b>N</b>                                               | 1,471 (100)         | 302 (21)                    | 615 (42)                | 553 (38)                            | -              |
| <b>Age &gt;60 years</b>                                | 235 (16)            | 126 (42)                    | 27 (4)                  | 79 (14)                             | <0.001         |
| <b>Number immunocompromised by disease/medication*</b> | 60 (4)              | 14 (5)                      | 18 (3)                  | 28 (5)                              | 0.23           |
| <b>Number with Diabetes mellitus</b>                   | 64 (4)              | 30 (10)                     | 11 (2)                  | 22 (4)                              | <0.001         |
| <b>Number with a history of alcohol excess</b>         | 36 (2)              | 21 (7)                      | 3 (0.5)                 | 12 (2)                              | <0.001         |

<sup>†</sup>= other meningitis category included all patients without a confirmed bacterial or viral pathogen

\*=Conditions listed as immunocompromising conditions included haematological malignancy (n=8), Other malignancy (n=8), solid organ transplant (n=6), liver cirrhosis (n=1), HIV (n=9), Pregnancy (n=2). Medication listed included Steroids (n=7), tocilizumab, ecolizumab and infliximab (n=6), Methotrexate (n=8), Mycophenolate (n=2), Azathioprine (n=3), 'chemotherapy' (n=4). (some patients had more than one immunocompromising condition/ medication).



1 STROBE Statement—Checklist of items that should be included in reports of *cohort studies*

|                          | Item No | Recommendation                                                                                                                                                                       | Location in paper                           |
|--------------------------|---------|--------------------------------------------------------------------------------------------------------------------------------------------------------------------------------------|---------------------------------------------|
| Title and abstract       | 1       | (a) Indicate the study's design with a commonly used term in the title or the abstract                                                                                               | Title, page 1, line 1                       |
|                          |         | (b) Provide in the abstract an informative and balanced summary of what was done and what was found                                                                                  | Abstract, page 2, line 40 onwards           |
| <b>Introduction</b>      |         |                                                                                                                                                                                      |                                             |
| Background/rationale     | 2       | Explain the scientific background and rationale for the investigation being reported                                                                                                 | Introduction, page 4 line 80 onwards        |
| Objectives               | 3       | State specific objectives, including any prespecified hypotheses                                                                                                                     | Introduction, page 5, line 104              |
| <b>Methods</b>           |         |                                                                                                                                                                                      |                                             |
| Study design             | 4       | Present key elements of study design early in the paper                                                                                                                              | Methods, page 5, line 108 onwards           |
| Setting                  | 5       | Describe the setting, locations, and relevant dates, including periods of recruitment, exposure, follow-up, and data collection                                                      | Methods, page 5, line 108 onwards           |
| Participants             | 6       | (a) Give the eligibility criteria, and the sources and methods of selection of participants. Describe methods of follow-up                                                           | Methods, page 6, box 1                      |
|                          |         | (b) For matched studies, give matching criteria and number of exposed and unexposed                                                                                                  | NA                                          |
| Variables                | 7       | Clearly define all outcomes, exposures, predictors, potential confounders, and effect modifiers. Give diagnostic criteria, if applicable                                             | Methods, page 6, box 1 and line 125 onwards |
| Data sources/measurement | 8*      | For each variable of interest, give sources of data and details of methods of assessment (measurement). Describe comparability of assessment methods if there is more than one group | Methods, page 5, line 110 onwards           |
| Bias                     | 9       | Describe any efforts to address potential sources of bias                                                                                                                            | Methods, page 5, line 117 onwards           |
|                          |         |                                                                                                                                                                                      | Discussion, page 17, line 294 onwards       |
| Study size               | 10      | Explain how the study size was arrived at                                                                                                                                            | Methods, page 5, line 110 onwards           |
| Quantitative variables   | 11      | Explain how quantitative variables were handled in the analyses. If applicable, describe which groupings were chosen and why                                                         | Methods, page 7, line 141 onwards           |
| Statistical methods      | 12      | (a) Describe all statistical methods, including those used to control for confounding                                                                                                | Methods, page 7, line 141 onwards           |
|                          |         | (b) Describe any methods used to examine subgroups and interactions                                                                                                                  | NA                                          |
|                          |         | (c) Explain how missing data were addressed                                                                                                                                          | Methods, page 6, line 130                   |
|                          |         | (d) If applicable, explain how loss to follow-up was addressed                                                                                                                       | NA                                          |
|                          |         | (e) Describe any sensitivity analyses                                                                                                                                                | NA                                          |

2 **Results**

|                          |     |                                                                                                                                                                                                              |                                                       |
|--------------------------|-----|--------------------------------------------------------------------------------------------------------------------------------------------------------------------------------------------------------------|-------------------------------------------------------|
| Participants             | 13* | (a) Report numbers of individuals at each stage of study—eg numbers potentially eligible, examined for eligibility, confirmed eligible, included in the study, completing follow-up, and analysed            | Results, page 7, line 156                             |
|                          |     | (b) Give reasons for non-participation at each stage                                                                                                                                                         | NA                                                    |
|                          |     | (c) Consider use of a flow diagram                                                                                                                                                                           | NA                                                    |
| Descriptive data         | 14* | (a) Give characteristics of study participants (eg demographic, clinical, social) and information on exposures and potential confounders                                                                     | Page 9, Table 1                                       |
|                          |     | (b) Indicate number of participants with missing data for each variable of interest                                                                                                                          | Page 10, Table 2                                      |
|                          |     | (c) Summarise follow-up time (eg, average and total amount)                                                                                                                                                  | NA                                                    |
| Outcome data             | 15* | Report numbers of outcome events or summary measures over time                                                                                                                                               | Page 9 Table 1, page 10, table 2 and page 15, table 3 |
| Main results             | 16  | (a) Give unadjusted estimates and, if applicable, confounder-adjusted estimates and their precision (eg, 95% confidence interval). Make clear which confounders were adjusted for and why they were included | Results, page 14, line 230 onwards                    |
|                          |     | (b) Report category boundaries when continuous variables were categorized                                                                                                                                    | NA                                                    |
|                          |     | (c) If relevant, consider translating estimates of relative risk into absolute risk for a meaningful time period                                                                                             | NA                                                    |
| Other analyses           | 17  | Report other analyses done—eg analyses of subgroups and interactions, and sensitivity analyses                                                                                                               | NA                                                    |
| <b>Discussion</b>        |     |                                                                                                                                                                                                              |                                                       |
| Key results              | 18  | Summarise key results with reference to study objectives                                                                                                                                                     | Discussion, page 16 line 249 onwards                  |
| Limitations              | 19  | Discuss limitations of the study, taking into account sources of potential bias or imprecision. Discuss both direction and magnitude of any potential bias                                                   | Discussion, page 17, line 294 onwards                 |
| Interpretation           | 20  | Give a cautious overall interpretation of results considering objectives, limitations, multiplicity of analyses, results from similar studies, and other relevant evidence                                   | Conclusion, page 18, line 313 onwards                 |
| Generalisability         | 21  | Discuss the generalisability (external validity) of the study results                                                                                                                                        | Discussion, page 17 line 296-8                        |
| <b>Other information</b> |     |                                                                                                                                                                                                              |                                                       |
| Funding                  | 22  | Give the source of funding and the role of the funders for the present study and, if applicable, for the original study on which the present article is based                                                | Page 22, Line 439                                     |

\*Give information separately for exposed and unexposed groups.

**Note:** An Explanation and Elaboration article discusses each checklist item and gives methodological background and published examples of transparent reporting. The STROBE checklist is best used in conjunction with this article (freely available on the Web sites of PLoS Medicine at <http://www.plosmedicine.org/>, Annals of Internal Medicine at <http://www.annals.org/>, and Epidemiology at <http://www.epidem.com/>). Information on the STROBE Initiative is available at <http://www.strobe-statement.org>.

1  
2  
3  
4  
5  
6  
7  
8  
9  
10  
11  
12  
13  
14  
15  
16  
17  
18  
19  
20  
21  
22  
23  
24  
25  
26  
27  
28  
29  
30  
31  
32  
33  
34  
35  
36  
37  
38  
39  
40  
41  
42  
43  
44  
45  
46  
47  
48  
49  
50  
51  
52  
53  
54  
55  
56  
57  
58  
59  
60

For peer review only

# BMJ Open

## Clinical management of community-acquired meningitis in adults in the United Kingdom and Ireland in 2017: a retrospective cohort study on behalf of the National Infection Trainees Collaborative for Audit and Research (NITCAR)

|                                 |                                                                                                                                                                                                                                                                                                                                                                                                                                                                                                                                                                                                                                                                                                                                                                                                                                                                                                                                                                        |
|---------------------------------|------------------------------------------------------------------------------------------------------------------------------------------------------------------------------------------------------------------------------------------------------------------------------------------------------------------------------------------------------------------------------------------------------------------------------------------------------------------------------------------------------------------------------------------------------------------------------------------------------------------------------------------------------------------------------------------------------------------------------------------------------------------------------------------------------------------------------------------------------------------------------------------------------------------------------------------------------------------------|
| Journal:                        | <i>BMJ Open</i>                                                                                                                                                                                                                                                                                                                                                                                                                                                                                                                                                                                                                                                                                                                                                                                                                                                                                                                                                        |
| Manuscript ID                   | bmjopen-2022-062698.R1                                                                                                                                                                                                                                                                                                                                                                                                                                                                                                                                                                                                                                                                                                                                                                                                                                                                                                                                                 |
| Article Type:                   | Original research                                                                                                                                                                                                                                                                                                                                                                                                                                                                                                                                                                                                                                                                                                                                                                                                                                                                                                                                                      |
| Date Submitted by the Author:   | 31-May-2022                                                                                                                                                                                                                                                                                                                                                                                                                                                                                                                                                                                                                                                                                                                                                                                                                                                                                                                                                            |
| Complete List of Authors:       | Ellis, Jayne; UCL, Harvey, David; Wirral University Teaching Hospital NHS Foundation Trust<br>Defres, Sylviane; University of Liverpool; Royal Liverpool and Broadgreen Hospitals NHS Trust<br>Chandna, Arjun ; Cambodia Oxford Medical Research Unit, Angkor Hospital for Children, ; University of Oxford Centre for Tropical Medicine and Global Health,<br>MacLachlan, Eloisa; University of Leeds; National Student Association of Medical Research<br>Solomon, Tom; University of Liverpool, Neurological Science, Medical Microbiology<br>Heyderman, Robert; University College London, Division of Infection and Immunity; University of Malawi College of Medicine, Malawi Liverpool Wellcome Trust Clinical Research Programme<br>McGill, Fiona; University of Liverpool, Institute of Infection and Global Health; Leeds Teaching Hospitals NHS Trust, Infectious Diseases study group, NAMM; British Infection Association, Collaborative authorship group |
| <b>Primary Subject Heading</b>: | Infectious diseases                                                                                                                                                                                                                                                                                                                                                                                                                                                                                                                                                                                                                                                                                                                                                                                                                                                                                                                                                    |
| Secondary Subject Heading:      | Emergency medicine, Neurology                                                                                                                                                                                                                                                                                                                                                                                                                                                                                                                                                                                                                                                                                                                                                                                                                                                                                                                                          |
| Keywords:                       | Diagnostic microbiology < INFECTIOUS DISEASES, Molecular diagnostics < INFECTIOUS DISEASES, Infectious disease/HIV < NEUROLOGY, INTERNAL MEDICINE, Protocols & guidelines < HEALTH SERVICES ADMINISTRATION & MANAGEMENT, BACTERIOLOGY                                                                                                                                                                                                                                                                                                                                                                                                                                                                                                                                                                                                                                                                                                                                  |
|                                 |                                                                                                                                                                                                                                                                                                                                                                                                                                                                                                                                                                                                                                                                                                                                                                                                                                                                                                                                                                        |

SCHOLARONE™  
Manuscripts

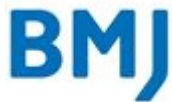

I, the Submitting Author has the right to grant and does grant on behalf of all authors of the Work (as defined in the below author licence), an exclusive licence and/or a non-exclusive licence for contributions from authors who are: i) UK Crown employees; ii) where BMJ has agreed a CC-BY licence shall apply, and/or iii) in accordance with the terms applicable for US Federal Government officers or employees acting as part of their official duties; on a worldwide, perpetual, irrevocable, royalty-free basis to BMJ Publishing Group Ltd ("BMJ") its licensees and where the relevant Journal is co-owned by BMJ to the co-owners of the Journal, to publish the Work in this journal and any other BMJ products and to exploit all rights, as set out in our [licence](#).

The Submitting Author accepts and understands that any supply made under these terms is made by BMJ to the Submitting Author unless you are acting as an employee on behalf of your employer or a postgraduate student of an affiliated institution which is paying any applicable article publishing charge ("APC") for Open Access articles. Where the Submitting Author wishes to make the Work available on an Open Access basis (and intends to pay the relevant APC), the terms of reuse of such Open Access shall be governed by a Creative Commons licence – details of these licences and which [Creative Commons](#) licence will apply to this Work are set out in our licence referred to above.

Other than as permitted in any relevant BMJ Author's Self Archiving Policies, I confirm this Work has not been accepted for publication elsewhere, is not being considered for publication elsewhere and does not duplicate material already published. I confirm all authors consent to publication of this Work and authorise the granting of this licence.

1  
2  
3 1 **Clinical management of community-acquired meningitis in adults in the United**  
4  
5 2 **Kingdom and Ireland in 2017: a retrospective cohort study on behalf of the National**  
6  
7 3 **Infection Trainees Collaborative for Audit and Research (NITCAR)**  
8  
9

10 4  
11 5 Jayne Ellis, Specialty trainee<sup>1</sup>, David Harvey, Consultant<sup>2</sup>, Sylviane Defres, Consultant<sup>3,4,10</sup>,  
12 6 Arjun Chandna, Specialty trainee<sup>5,6</sup>, Eloisa Maclachlan, Medical Student<sup>7,8</sup>, Tom Solomon,  
13 7 Professor<sup>4,9,10</sup>, Robert S Heyderman (0000-0003-4573-449X), Professor<sup>1,11</sup>, Fiona McGill  
14 8 (0000-0002-0903-9046), Consultant<sup>4,10,12</sup> on behalf of the National Audit of Meningitis  
15 9 Management (NAMM) group  
16

- 17 10  
18 11  
19 12 1. Hospital for Tropical Diseases, University College London Hospitals NHS  
20 13 Foundation Trust, London, UK.  
21 14 2. Wirral University Teaching Hospital NHS Foundation Trust, UK.  
22 15 3. Liverpool University Hospitals NHS Foundation Trust, Liverpool, UK.  
23 16 4. Institute of Infection, Veterinary and Ecological Sciences, University of Liverpool,  
24 17 Liverpool, UK.  
25 18 Nuffield department of Medicine, University of Oxford, Oxford, UK.  
26 19 5. Department of Clinical Research, London School of Hygiene and Tropical Medicine,  
27 20 London, UK.  
28 21 6. Mahidol-Oxford Tropical Medicine Research Unit, Mahidol University, Bangkok,  
29 22 Thailand.  
30 23 7. University of Leeds, Leeds, UK.  
31 24 8. National Student Association for Medical Research.  
32 25 9. The Walton Centre NHS Foundation Trust, Liverpool, UK  
33 26 10. NIHR Health Protection Research Unit for Emerging and Zoonotic Infections,  
34 27 University of Liverpool, Liverpool, UK.  
35 28 11. Research Department of Infection, Division of Infection and Immunity, University  
36 29 College London, London, UK.  
37 30 12. Department of Infection and Travel Medicine and Department of Microbiology,  
38 31 Leeds Teaching Hospitals NHS Trust, Leeds, UK.  
39 32  
40 33  
41  
42  
43  
44

45 34 **Correspondence to:** Dr Fiona McGill, Leeds Teaching Hospitals NHS Trust, Beckett Street,  
46 35 Leeds, LS9 7TF  
47  
48 36 [f.mcgill@nhs.net](mailto:f.mcgill@nhs.net)  
49  
50  
51  
52  
53  
54

55 38 Word count: 2901  
56  
57  
58  
59  
60

1  
2  
3 40 **Abstract**

4 41 **Objectives:** To assess practice in the care of adults with suspected community acquired  
5  
6 42 bacterial meningitis in the UK and Ireland.

8 43 **Design:** Retrospective cohort study.

10 44 **Setting:** 64 UK and Irish hospitals.

12 45 **Participants:** 1,471 adults with community acquired meningitis of any aetiology in 2017.

14 46 **Results:** None of the audit standards, from the 2016 UK Joint Specialists Societies guideline  
15  
16 47 on diagnosis and management of meningitis, were met in all cases. With respect to 20 of 30  
17  
18 48 assessed standards, clinical management provided for patients was in line with  
19  
20 49 recommendations in less than 50% of cases. 45% of patients had blood cultures taken within  
21  
22 50 an hour of admission, 0.5% had a lumbar puncture within one hour, 26% within 8 hours. 28%  
23  
24 51 had bacterial molecular diagnostic tests on CSF. Median time to first dose of antibiotics was  
25  
26 52 3.2 hours (IQR 1.3-9.2). 82% received empirical parenteral cephalosporins. 55%  $\geq$  60 years  
27  
28 53 and 31% of immunocompromised patients received anti-*Listeria* antibiotics. 21% received  
29  
30 54 steroids. Of the 1,471 patients, 21% had confirmed bacterial meningitis. Amongst those with  
31  
32 55 bacterial meningitis, pneumococcal aetiology, admission to intensive care and initial Glasgow  
33  
34 56 Coma Scale score less than 14 were associated with in-hospital mortality (adjusted odds ratio  
35  
36 57 [aOR] 2.08, 95% CI 0.96 – 4.48; aOR 4.28, 95% CI 1.81 – 10.1; aOR 2.90, 95% CI 1.26 – 6.71  
37  
38 58 respectively). Dexamethasone therapy was weakly associated with a reduction in mortality in  
39  
40 59 both those with proven bacterial meningitis (aOR 0.57, 95% CI 0.28 – 1.17) and with  
41  
42 60 pneumococcal meningitis (aOR 0.47, 95% CI 0.20 – 1.10).

43  
44 61 **Conclusion:** This study demonstrates that clinical care for patients with meningitis in the UK  
45  
46 62 is not in line with current evidence-based national guidelines. Diagnostics and therapeutics  
47  
48 63 should be targeted for quality improvement strategies. Work should be done to improve the  
49  
50 64 impact of guidelines, understand why they are not followed and, once published, ensure they  
51  
52 65 translate into changed practice.

1  
2  
3 66  
4  
5  
6  
7  
8  
9  
10  
11  
12  
13  
14  
15  
16  
17  
18  
19  
20  
21  
22  
23  
24  
25  
26  
27  
28  
29  
30  
31  
32  
33  
34  
35  
36  
37  
38  
39  
40  
41  
42  
43  
44  
45  
46  
47  
48  
49  
50  
51  
52  
53  
54  
55  
56  
57  
58  
59  
60

67 **Keywords:** meningitis, adults, bacteria, antibiotics, management, guidelines

For peer review only



## 68 **Strengths and limitations of this study**

- 69 • To our knowledge, this is the largest national study of the management of meningitis  
70 in the UK published to date.
- 71 • The study includes all suspected community acquired bacterial meningitis, allowing  
72 assessment of early clinical care prior to an aetiological diagnosis being made.
- 73 • The study is widely translatable and representative of practice within the UK and  
74 Ireland.
- 75 • The study is limited by its retrospective design which brings associated recall bias and  
76 some missing data.
- 77 • The study may also be limited by the self-selection of the sites included.

## 79 **Introduction**

81 Acute bacterial meningitis is a medical emergency associated with considerable death and  
82 disability in the UK(1). Successful immunisation programmes targeting *Haemophilus*  
83 *influenzae* type b, *Streptococcus pneumoniae* and *Neisseria meningitidis* means that  
84 community acquired bacterial meningitis, particularly in children and adolescents, is now  
85 relatively rare (2). The incidence of bacterial meningitis in adults in England is estimated to be  
86 approximately 1-1.25 per 100,000 population overall, exceeding 9 per 100,000 in people over  
87 70 years (2, 3).

88 Early recognition of meningitis, appropriate investigation, and treatment, saves lives  
89 (4, 5). It is essential that front-line clinicians, who may not encounter meningitis very often,  
90 are vigilant and have a high index of suspicion to minimise poor outcomes. To help staff who  
91 are seeing patients with suspected meningitis, the UK guidelines on the diagnosis and  
92 management of acute meningitis and meningococcal sepsis in immunocompetent adults were  
93 published in 2016(6). The guidelines provide readily accessible, comprehensive, evidenced-  
94 based recommendations. Previous studies show that clinical care delivered in the UK is  
95 frequently non-adherent to guidelines(7, 8). A more recent UK study highlighted a large  
96 amount of inappropriate brain imaging prior to lumbar punctures (LPs) and long delays in  
97 performing LPs (3, 9). Inadequate use of molecular diagnostics and HIV-testing have also been

1  
2  
3 98 highlighted as areas for improvement(3). The increasing risk of multi-drug resistant bacteria,  
4  
5 99 an ageing population susceptible to a wider variety of bacteria (e.g. *Listeria monocytogenes*,  
6  
7  
8 100 *Escherichia coli* and *Klebsiella pneumoniae*)(2) and a greater appreciation that viruses are  
9  
10 101 common causes of meningitis(10, 11), make diagnostics essential. Reports from outside the  
11  
12 102 UK have shown improvements in outcomes following guideline publication and  
13  
14 103 implementation (12). We carried out a retrospective observational study with the dual aims of  
15  
16 104 i) assessing current clinical practice regarding diagnosis and management of adult patients with  
17  
18 105 suspected community acquired bacterial meningitis, and ii) to identify areas for improvement.  
19  
20  
21

## 22 106 **Methods**

23 107  
24 108 Hospitals in the UK were invited to take part in this study via the National Infection Trainees  
25  
26 109 Collaborative for Audit and Research (NITCAR) network, the UK Meningitis study network,  
27  
28 110 the British Infection Association (BIA) and through personal contacts. Eligible patients were  
29  
30 111 identified via hospital coding data, laboratory data, or a combination of both. Data from  
31  
32 112 patients aged 16 or over who presented with suspected acute community acquired bacterial  
33  
34 113 meningitis during 2017 were eligible for screening. Patients who met our case definition for  
35  
36 114 confirmed acute meningitis, regardless of aetiology, were eligible for inclusion (box 1).  
37  
38 115 Definitions are as previously published(3). Many interventions are performed prior to  
39  
40 116 knowing the diagnosis, therefore, we included all meningitis in the analysis, including viral  
41  
42 117 and those in whom no pathogen was identified. This allowed us to assess the entire clinical  
43  
44 118 pathway of patients presenting with possible bacterial meningitis, although some would be  
45  
46 119 ultimately diagnosed with a different aetiology.  
47  
48  
49  
50  
51

52 120

53  
54  
55 121

**Box 1: Inclusion and exclusion criteria for cases of meningitis**A meningitis case was defined as:

- (1) Patients with a cerebrospinal fluid (CSF) WCC  $>4 \times 10^6$  cells/L (regardless of whether a pathogen was identified or not) and a clinical suspicion of meningitis at the time OR
- (2) in the case of bacterial meningitis, symptoms and signs of meningitis with a significant pathogen in the CSF (culture or PCR) or blood regardless of CSF leukocyte count.

Patients with the following diagnoses were excluded:

- (1) Cryptococcal meningitis;
- (2) Tuberculous meningitis;
- (3) Nosocomial meningitis (defined as meningitis that occurs during a hospital admission or within 30 days of discharge or meningitis associated with indwelling devices in the central nervous system)
- (4) Encephalitis (defined as altered consciousness for  $>24$  with no other cause found and two or more of the following signs: fever or history of fever ( $\geq 38^\circ\text{C}$ ) during the current illness; seizures or focal neurological signs (with evidence of brain parenchyma involvement); CSF pleocytosis ( $>4 \times 10^6$  cells per L); EEG suggesting encephalitis; and neuroimaging suggestive of encephalitis).

Standards indicative of good practice were taken from the 2016 UK Joint Specialists Societies guideline on the diagnosis and management of meningitis and meningococcal sepsis in immunocompetent adults, and the Standards in Microbiological Investigations on the processing of cerebrospinal fluid (B27) (6, 13). For each standard, the number of patients as a proportion of the total cohort who received clinical care in line with the standard is reported. A second adjusted analysis taking account of missing data is also reported, whereby the number of patients as a proportion of the cohort with available data who received clinical care in line with the standard was reported.

1  
2  
3 130 Data were collected using electronic case report forms on REDcap™, a password  
4  
5 131 protected central web-based database system. All microbiological diagnostic procedures were  
6  
7 132 performed at the local hospital laboratory for each participating site using locally approved  
8  
9 133 procedures. All data were anonymised and recorded under a unique participant identification  
10  
11 134 number.

#### 15 135 *Ethics approval*

17 136 As all data were anonymised individual patient consent and ethical approval was not required.  
18  
19 137 The study was registered with each site's clinical governance department in line with local  
20  
21 138 procedure.

#### 24 139 *Statistical analyses*

26 140 Descriptive statistics were used to summarize data. Categorical data were summarized using  
27  
28 141 counts and percentages. Denominators presented are based on available data, where incomplete  
29  
30 142 case records were submitted by contributing sites. For continuous variables, means and ranges  
31  
32 143 or medians and inter-quartile ranges (IQRs) are presented depending on the distribution of the  
33  
34 144 data. Categorical data were analysed using Chi squared or Fisher's exact test. Continuous data  
35  
36 145 were analysed using t-tests, Mann Whitney U or Kruskal Wallis depending on the distribution  
37  
38 146 of the data. Regression analysis was used to identify potential risk factors associated with poor  
39  
40 147 outcomes.

#### 44 148 *Patient and public involvement*

46 149 Although there was no direct involvement of patients and public in this study the Meningitis  
47  
48 150 Research Foundation, a key advocacy group for patients are represented in the authorship of  
49  
50 151 the original guidelines and will be key in the dissemination of the results and the subsequent  
51  
52 152 call to improve practice. Preliminary results have been shared with the Meningitis Research  
53  
54 153 Foundation and some of their members.

## 58 154 **Results**

59 155

1  
2  
3 156 1,471 patients from 64 hospitals throughout the UK and Ireland took part (see appendix). The  
4  
5 157 hospitals ranged in size from small district generals to larger teaching hospitals. The mean  
6  
7 158 number of beds was 846 (range 230-2000). The hospitals who took part in England comprised  
8  
9 159 45% of the total acute bed base in England, (42,612/94,827(14)). Females accounted for 57%  
10  
11 160 (n=838) and the median age was 34 years (IQR 26,49). Confirmed viral meningitis occurred in  
12  
13 161 615 (42%) and 303 had confirmed bacterial meningitis (21%). More than one third of patients  
14  
15 162 (n=553) fulfilled the case definition (box 1) but had no confirmed microbiological diagnosis  
16  
17 163 and were therefore categorised as meningitis of unknown aetiology. Using the criteria proposed  
18  
19 164 by Spanos et al(15) 56 of those without a confirmed aetiology could be assumed to have  
20  
21 165 bacterial meningitis. *Streptococcus pneumoniae* and *Neisseria meningitidis*, were the most  
22  
23 166 common bacterial pathogens, where a cause was found, accounting for 172 (57%) and 76  
24  
25 167 (25%) of cases respectively. *Haemophilus influenzae* (serotypes unknown) was found in 14  
26  
27 168 cases. *Enteroviruses* were the most common viral pathogens occurring in 429 (69%) of all  
28  
29 169 confirmed viral meningitis. *Herpes simplex virus-2* was the second most common viral  
30  
31 170 pathogen detected in 97 (16%) of viral cases. Baseline demographics and clinical  
32  
33 171 characteristics are shown in table 1.  
34  
35  
36  
37  
38  
39  
40  
41  
42  
43  
44  
45  
46  
47  
48  
49  
50  
51  
52  
53  
54  
55  
56  
57  
58  
59  
60

**Table 1: Baseline demographics, timing of key investigations and clinical outcomes of 1,471 adults presenting with suspected meningitis**

|                                                                      | <i>Total cohort</i> | <i>Bacterial meningitis</i> | <i>Viral meningitis</i> | <i>Other†</i>     | <i>P value<sup>1</sup></i> |
|----------------------------------------------------------------------|---------------------|-----------------------------|-------------------------|-------------------|----------------------------|
|                                                                      | <i>N (%)</i>        | <i>N (%)</i>                | <i>N (%)</i>            | <i>N (%)</i>      |                            |
| <b>N</b>                                                             | 1,471 (100)         | 303 (21)                    | 615 (42)                | 553 (38)          | -                          |
| <b>Median age (IQR)</b>                                              | 34 (26 – 49)        | 54 (36 – 65)                | 31 (25 – 37)            | 34 (26 – 48)      | < 0.001                    |
| <b>Male</b>                                                          | 625 (43)            | 173 (57)                    | 214 (35)                | 238 (43)          | < 0.001                    |
| <b>In patient mortality</b>                                          | 48 (3)              | 38 (13)                     | 2 (0.3)                 | 8 (1.4)           | < 0.001                    |
| <b>ITU admission</b>                                                 | 192 (13)            | 157 (53)                    | 4 (0.7)                 | 31 (6)            | < 0.001                    |
| <b>Median Admission GCS (IQR)</b>                                    | 15 (14-15)          | 13 (9 – 15)                 | 15 (15-15)              | 15 (15-15)        | < 0.001                    |
| <b>Median time (hours) from admission to first antibiotics (IQR)</b> | 2.7 (0.9 – 8.3)     | 1.5 (0.4 – 5.3)             | 3.2 (1.3 – 8.3)         | 3.3. (1 – 12.5)   | < 0.001                    |
| <b>Median time (hours) from admission to blood cultures (IQR)</b>    | 1 (0.3 – 4)         | 0.7 (0.2 – 2.4)             | 1 (0.3 – 3.7)           | 1.4 (0.3 – 6.1)   | 0.003                      |
| <b>CT head prior to LP</b>                                           | 1,094 (94)          | 207 (93)                    | 459 (94)                | 428 (95)          | 0.55                       |
| <b>Median time (hours) from admission to LP (IQR)</b>                | 16.4 (7.9 – 26.7)   | 14.8 (7.7 – 29.8)           | 14.3 (7.5 – 22.6)       | 20 (8.8 – 35.8)   | < 0.001                    |
| <b>Adjunctive dexamethasone</b>                                      | 300 (21)            | 150 (50)                    | 69 (11)                 | 81 (15)           | < 0.001                    |
| <b>Median CSF leucocyte count (IQR)</b>                              | 140 (44-399)        | 930 (235.5 – 3062.5)        | 122 (48 – 276)          | 85 (26.8 – 250.3) | < 0.001                    |
| <b>Median CSF protein (IQR)</b>                                      | 0.68 (0.46 - 1.21)  | 3.25 (1.4 – 5.8)            | 0.63 (0.45-0.9)         | 0.6 (0.4-1.0)     | < 0.001                    |
| <b>Median CSF glucose (IQR)</b>                                      | 3.2 (2.8-3.7)       | 2.1 (0.95 – 3.45)           | 3.2 (2.9 – 3.6)         | 3.3 (3.0-3.8)     | < 0.001                    |

† = other meningitis category included all patients without a confirmed bacterial or viral pathogen

<sup>1</sup> = for continuous variables, the Kruskal-Wallis test was used to compare medians across groups, and for categorical variables Chi squared tests were used.

173

174 Adherence to specific standards of good practice is shown in table 2. None were  
 175 adhered to 100% of the time. Two thirds of the standards (n=20) had less than or equal to 50%  
 176 adherence.

| <b>Table 2: Adherence to audit standards<sup>^</sup></b>                                                                                                                                                                                  |                                                                   |                   |                                                                     |                              |
|-------------------------------------------------------------------------------------------------------------------------------------------------------------------------------------------------------------------------------------------|-------------------------------------------------------------------|-------------------|---------------------------------------------------------------------|------------------------------|
| <b>Immediate management</b>                                                                                                                                                                                                               |                                                                   |                   |                                                                     |                              |
|                                                                                                                                                                                                                                           | <b>Number achieved standard/total number of patients analysed</b> | <b>% of total</b> | <b>Number achieved standard/total number of patients evaluable*</b> | <b>% of number evaluable</b> |
| 1. The patient's conscious level should be documented using the Glasgow coma scale.                                                                                                                                                       | 1,283/1,471                                                       | 87%               | 1283/1448                                                           | 89%                          |
| 2. Blood cultures should be taken as soon as possible and within 1 h of arrival at hospital                                                                                                                                               | 326/1,471 <sup>1</sup>                                            | 22%               | 326/767 <sup>2</sup>                                                | 42%                          |
| 3. LP should be performed within 1 h of arrival at hospital provided that it is safe to do so                                                                                                                                             | 8/1,471 <sup>3</sup>                                              | 0.5%              | 8/1379 <sup>4</sup>                                                 | 0.6%                         |
| 4. Antibiotic treatment should be commenced within the first hour                                                                                                                                                                         | 207/1471 <sup>5</sup>                                             | 14%               | 207/1083 <sup>6</sup>                                               | 19%                          |
| 5. Patients with meningitis and meningococcal sepsis should be cared for with the input of an infection specialist such as a microbiologist or a physician with training in infectious diseases and/or microbiology                       | 1,148/1,471 <sup>7</sup>                                          | 78%               | 1148/1464                                                           | 78%                          |
| <b>Investigations</b>                                                                                                                                                                                                                     |                                                                   |                   |                                                                     |                              |
| 6. Blood culture should be sent                                                                                                                                                                                                           | 977/1,471                                                         | 66%               | 977/1469                                                            | 67%                          |
| 7. Blood Pneumococcal PCR should be sent                                                                                                                                                                                                  | 211/1,471                                                         | 14%               | 211/1460                                                            | 14%                          |
| 8. Blood Meningococcal PCR should be sent                                                                                                                                                                                                 | 232/1,471                                                         | 16%               | 232/1461                                                            | 16%                          |
| 9. CSF opening pressure should be documented                                                                                                                                                                                              | 655/1,428 <sup>8</sup>                                            | 46%               | 655/1361 <sup>9</sup>                                               | 48%                          |
| 10. CSF glucose with concurrent plasma glucose should be sent                                                                                                                                                                             | 607/1,428 <sup>8</sup>                                            | 43%               | 607/1415                                                            | 43%                          |
| 11. CSF protein should be sent                                                                                                                                                                                                            | 1,358/1,428 <sup>8</sup>                                          | 95%               | 1358/1420                                                           | 96%                          |
| 12. Microscopy of the CSF should take place within 2 hours of the lumbar puncture                                                                                                                                                         | 596/1428 <sup>8</sup>                                             | 42%               | 596/1203 <sup>10</sup>                                              | 50%                          |
| 13. CSF for pneumococcal PCR should be sent in all cases of suspected bacterial meningitis                                                                                                                                                | 412/1,428 <sup>8</sup>                                            | 29%               | 412/1418                                                            | 29%                          |
| 14. CSF for Meningococcal PCR should be sent in all cases of suspected bacterial meningitis                                                                                                                                               | 434/1,428 <sup>8</sup>                                            | 30%               | 434/1418                                                            | 31%                          |
| 15. A swab of the posterior nasopharyngeal wall should be obtained as soon as possible, and sent for meningococcal culture, in all cases of suspected meningococcal meningitis/sepsis                                                     | 54/1,471                                                          | 4%                | 54/1463 <sup>11</sup>                                               | 4%                           |
| 16. All patients with meningitis should have an HIV test                                                                                                                                                                                  | 646/1,471                                                         | 44%               | 646/1459 <sup>12</sup>                                              | 44%                          |
| <b>Treatment</b>                                                                                                                                                                                                                          |                                                                   |                   |                                                                     |                              |
| 17. All patients with suspected meningitis or meningococcal sepsis should be given ceftriaxone or cefotaxime                                                                                                                              | 1039/1471 <sup>13</sup>                                           | 71%               | 1039/1423 <sup>14</sup>                                             | 73%                          |
| 18. If the patient has, within the last 6 months, been to a country where penicillin resistant pneumococci are prevalent, IV vancomycin 15-20 mg/kg should be added 12-hourly (or 600 mg rifampicin 12-hourly IV or orally) <sup>15</sup> | See footnote                                                      |                   |                                                                     |                              |

|                                                                                                                                                                                                                                                                                                                                                                                                                                                                                                                                                                                                                                                                                                                                                                                                                                                                                                                                                                                                                                                                                                                                                                                                                                                                                                                                                                                                                                                                                                                                                                                                                                                                                                                                                                                                                                                                                                                                                                                                                                                                                                                                                                                                                                                                                                                                                                                                                                                                                                                                                                                                                                                                                                                                                    |                       |     |                       |                   |
|----------------------------------------------------------------------------------------------------------------------------------------------------------------------------------------------------------------------------------------------------------------------------------------------------------------------------------------------------------------------------------------------------------------------------------------------------------------------------------------------------------------------------------------------------------------------------------------------------------------------------------------------------------------------------------------------------------------------------------------------------------------------------------------------------------------------------------------------------------------------------------------------------------------------------------------------------------------------------------------------------------------------------------------------------------------------------------------------------------------------------------------------------------------------------------------------------------------------------------------------------------------------------------------------------------------------------------------------------------------------------------------------------------------------------------------------------------------------------------------------------------------------------------------------------------------------------------------------------------------------------------------------------------------------------------------------------------------------------------------------------------------------------------------------------------------------------------------------------------------------------------------------------------------------------------------------------------------------------------------------------------------------------------------------------------------------------------------------------------------------------------------------------------------------------------------------------------------------------------------------------------------------------------------------------------------------------------------------------------------------------------------------------------------------------------------------------------------------------------------------------------------------------------------------------------------------------------------------------------------------------------------------------------------------------------------------------------------------------------------------------|-----------------------|-----|-----------------------|-------------------|
| 19. Those aged 60 or over should receive 2 g IV ampicillin/amoxicillin 4-hourly in addition to a cephalosporin [1B].                                                                                                                                                                                                                                                                                                                                                                                                                                                                                                                                                                                                                                                                                                                                                                                                                                                                                                                                                                                                                                                                                                                                                                                                                                                                                                                                                                                                                                                                                                                                                                                                                                                                                                                                                                                                                                                                                                                                                                                                                                                                                                                                                                                                                                                                                                                                                                                                                                                                                                                                                                                                                               | 55/233                | 24% | 55/197 <sup>16</sup>  | 28%               |
| 20. Immunocompromised patients (including diabetics and those with a history of alcohol misuse) should receive 2 g IV ampicillin/amoxicillin 4-hourly in addition to a cephalosporin.                                                                                                                                                                                                                                                                                                                                                                                                                                                                                                                                                                                                                                                                                                                                                                                                                                                                                                                                                                                                                                                                                                                                                                                                                                                                                                                                                                                                                                                                                                                                                                                                                                                                                                                                                                                                                                                                                                                                                                                                                                                                                                                                                                                                                                                                                                                                                                                                                                                                                                                                                              | 26/115 <sup>17</sup>  | 23% | 26/99 <sup>18</sup>   | 26%               |
| 21. If there is a clear history of anaphylaxis to penicillins or cephalosporins give IV chloramphenicol 25 mg/kg 6- hourly                                                                                                                                                                                                                                                                                                                                                                                                                                                                                                                                                                                                                                                                                                                                                                                                                                                                                                                                                                                                                                                                                                                                                                                                                                                                                                                                                                                                                                                                                                                                                                                                                                                                                                                                                                                                                                                                                                                                                                                                                                                                                                                                                                                                                                                                                                                                                                                                                                                                                                                                                                                                                         | 14/37                 | 38% | 14/30 <sup>19</sup>   | 47%               |
| 22. If <i>Streptococcus pneumoniae</i> is identified continue with IV benzylpenicillin 2.4 g 4 hourly, 2 g ceftriaxone IV 12 hourly or 2 g cefotaxime IV 6-hourly                                                                                                                                                                                                                                                                                                                                                                                                                                                                                                                                                                                                                                                                                                                                                                                                                                                                                                                                                                                                                                                                                                                                                                                                                                                                                                                                                                                                                                                                                                                                                                                                                                                                                                                                                                                                                                                                                                                                                                                                                                                                                                                                                                                                                                                                                                                                                                                                                                                                                                                                                                                  | 114/172               | 66% | 114/145 <sup>20</sup> | 79%               |
| 23. If <i>N. meningitidis</i> is identified 2 g ceftriaxone IV 12 hourly, 2 g cefotaxime IV 6-hourly or 2.4 benzylpenicillin IV 4-hourly may be given as an alternative                                                                                                                                                                                                                                                                                                                                                                                                                                                                                                                                                                                                                                                                                                                                                                                                                                                                                                                                                                                                                                                                                                                                                                                                                                                                                                                                                                                                                                                                                                                                                                                                                                                                                                                                                                                                                                                                                                                                                                                                                                                                                                                                                                                                                                                                                                                                                                                                                                                                                                                                                                            | 52/76                 | 68% | 52/68 <sup>21</sup>   | 76%               |
| 24. If the patient is not treated with ceftriaxone (in meningococcal disease), a single dose of 500 mg ciprofloxacin orally should also be given                                                                                                                                                                                                                                                                                                                                                                                                                                                                                                                                                                                                                                                                                                                                                                                                                                                                                                                                                                                                                                                                                                                                                                                                                                                                                                                                                                                                                                                                                                                                                                                                                                                                                                                                                                                                                                                                                                                                                                                                                                                                                                                                                                                                                                                                                                                                                                                                                                                                                                                                                                                                   | 0/2                   | 0%  | 0/2                   | 0%                |
| 25. If <i>Listeria monocytogenes</i> is identified Give 2 g ampicillin/amoxicillin IV 4-hourly and continue for at least 21 days. Co-trimoxazole 10-20 mg/kg or chloramphenicol are alternatives in cases of anaphylaxis to beta lactams.                                                                                                                                                                                                                                                                                                                                                                                                                                                                                                                                                                                                                                                                                                                                                                                                                                                                                                                                                                                                                                                                                                                                                                                                                                                                                                                                                                                                                                                                                                                                                                                                                                                                                                                                                                                                                                                                                                                                                                                                                                                                                                                                                                                                                                                                                                                                                                                                                                                                                                          | 4/7                   | 57% | 4/6                   | 67% <sup>22</sup> |
| 26. If <i>Haemophilus influenzae</i> is identified continue 2g ceftriaxone IV 12-hourly or 2 g cefotaxime IV 6-hourly for 10 days                                                                                                                                                                                                                                                                                                                                                                                                                                                                                                                                                                                                                                                                                                                                                                                                                                                                                                                                                                                                                                                                                                                                                                                                                                                                                                                                                                                                                                                                                                                                                                                                                                                                                                                                                                                                                                                                                                                                                                                                                                                                                                                                                                                                                                                                                                                                                                                                                                                                                                                                                                                                                  | 9/14                  | 64% | 9/13                  | 69% <sup>23</sup> |
| 27. 10 mg dexamethasone IV 6 hourly should be started on admission, either shortly before or simultaneously with antibiotics.                                                                                                                                                                                                                                                                                                                                                                                                                                                                                                                                                                                                                                                                                                                                                                                                                                                                                                                                                                                                                                                                                                                                                                                                                                                                                                                                                                                                                                                                                                                                                                                                                                                                                                                                                                                                                                                                                                                                                                                                                                                                                                                                                                                                                                                                                                                                                                                                                                                                                                                                                                                                                      | 67/1,471              | 5%  | 67/1435 <sup>24</sup> | 5%                |
| 28. If pneumococcal meningitis is confirmed dexamethasone should be continued for 4 days.                                                                                                                                                                                                                                                                                                                                                                                                                                                                                                                                                                                                                                                                                                                                                                                                                                                                                                                                                                                                                                                                                                                                                                                                                                                                                                                                                                                                                                                                                                                                                                                                                                                                                                                                                                                                                                                                                                                                                                                                                                                                                                                                                                                                                                                                                                                                                                                                                                                                                                                                                                                                                                                          | 34/172 <sup>25</sup>  | 20% | 34/158 <sup>26</sup>  | 22%               |
| <b>Critical Care</b>                                                                                                                                                                                                                                                                                                                                                                                                                                                                                                                                                                                                                                                                                                                                                                                                                                                                                                                                                                                                                                                                                                                                                                                                                                                                                                                                                                                                                                                                                                                                                                                                                                                                                                                                                                                                                                                                                                                                                                                                                                                                                                                                                                                                                                                                                                                                                                                                                                                                                                                                                                                                                                                                                                                               |                       |     |                       |                   |
| 29. The following patients should be transferred to critical care - those with a rapidly evolving rash, those with a GCS of 12 or less and those with uncontrolled seizures                                                                                                                                                                                                                                                                                                                                                                                                                                                                                                                                                                                                                                                                                                                                                                                                                                                                                                                                                                                                                                                                                                                                                                                                                                                                                                                                                                                                                                                                                                                                                                                                                                                                                                                                                                                                                                                                                                                                                                                                                                                                                                                                                                                                                                                                                                                                                                                                                                                                                                                                                                        | 151/203 <sup>27</sup> | 74% | 151/203               | 74%               |
| <b>Notification</b>                                                                                                                                                                                                                                                                                                                                                                                                                                                                                                                                                                                                                                                                                                                                                                                                                                                                                                                                                                                                                                                                                                                                                                                                                                                                                                                                                                                                                                                                                                                                                                                                                                                                                                                                                                                                                                                                                                                                                                                                                                                                                                                                                                                                                                                                                                                                                                                                                                                                                                                                                                                                                                                                                                                                |                       |     |                       |                   |
| 30. All cases of meningitis (regardless of aetiology) should be notified to the relevant public health authority                                                                                                                                                                                                                                                                                                                                                                                                                                                                                                                                                                                                                                                                                                                                                                                                                                                                                                                                                                                                                                                                                                                                                                                                                                                                                                                                                                                                                                                                                                                                                                                                                                                                                                                                                                                                                                                                                                                                                                                                                                                                                                                                                                                                                                                                                                                                                                                                                                                                                                                                                                                                                                   | 236/1,471             | 16% | 236/1465              | 16%               |
| <p>Notes.</p> <p>^Only those audit standards that could be measured from the data collected. *excludes those where there was missing data and/or where not relevant. 1. Only 977 patients had blood cultures taken. 2. Excluding those who did not have blood cultures taken and where data was missing. 3. 1428 patients had a LP. 4. Excludes those who did not have an LP and where data was not available. 5. 82 patients had data consistent with having antibiotics prior to admission, this might be due to confusion about whether admission meant admission to the emergency department or admission to a ward, or it may represent data entry error therefore, these figures are not included. 6. 388 patients did not receive any antibiotics at all. 7. 310 (21%) of patients were admitted under an infection specialist, all others received consulting advice only. 8. 43 people did not have an LP. 9. Missing data on 67. 10. 43 had no LP, 97 missing data, 128 time of microscopy was before or at the same time as the LP. 11. Performed in 15/76 (20%) of proven meningococcal cases. 12. 9 known HIV positive and 3 missing data. 13. 285 patients were not given any antibiotics at all. 14. 48 patients who were definitely given antibiotics had missing data on which antibiotics they were given. 15. Using mainland Europe data only and with reference to ECDC data – 101 patients were documented to have travelled to a mainland European country within the previous 6 months. Travel history was not documented at all in 822 cases (56%). Of the 101 patients who had travelled to mainland Europe 54 (54%) had been to a country with a rate of penicillin resistant pneumococci of &gt;5% (2017 data). 5/52 had no antibiotics. 0/47 had antibiotics to cover for penicillin resistant pneumococci. 16. 233 patients were aged over 60 but only 207 received antibiotics. Missing data for 10, 108 received amoxicillin at some point but only 55 received the correct dose. 17. Not including those &gt;=60. 18. 15 did not received any antibiotics and missing data on 1. 19. 7 patients had no antibiotics at all. 20. 27 patients had insufficient antibiotic data. 21. 8 patient had insufficient antibiotic data. 22. 1 patient had insufficient antibiotic data. 23. Insufficient antibiotic data on 1 person. 24. Missing data on 36 – 11 on whether dexamethasone was received or not, 21 on the dose given and 4 on the timing. 25. Only 18 were given the correct dose (10mg). Some received dexamethasone for longer than 4 days. 26. Missing data on 14 individuals. 27. 7/11 patient with progressing rash, 131/176 patients with GCS &lt;13 and 13/16 patients with uncontrolled seizures.</p> |                       |     |                       |                   |



1  
2  
3 178 Overall in-hospital mortality was low [48/1471 (3%)]. The mortality was higher in  
4  
5 179 bacterial meningitis (28/302, 13%), and pneumococcal meningitis in particular (28/172, 16%).  
6  
7  
8 180 Mortality in viral meningitis was 0.3% (2/615) and 1.5% (8/548) in those with meningitis of  
9  
10 181 unknown aetiology. Just over half (157) of those with confirmed bacterial meningitis required  
11  
12 182 admission to an intensive care unit (ICU).

13  
14  
15 183 *Use of diagnostics*

16 184 A few patients, 42, did not have an LP, of whom 26 (62%) had no contraindication (as specified  
17  
18 185 in the 2016 joint specialties guidelines and shown in box 2). Five had meningococcal sepsis  
19  
20 186 without clinical evidence of meningitis. The remaining 37 had clinical symptoms of meningism  
21  
22 187 as well as a positive blood culture (n=35, 83%) and/or a positive blood PCR (n=16, 38%) for  
23  
24 188 either *Streptococcus pneumoniae* (n=23, 55%), *Neisseria meningitidis* (n=18, 43%) or *Listeria*  
25  
26 189 *monocytogenes* (n=1, 2%).  
27  
28  
29  
30  
31

32  
33 191 **Box 2: Indications for neuroimaging before**  
34 **lumbar puncture (LP) in suspected**  
35 **meningitis**

- 36 192 (1) Focal neurological signs  
37 (2) Presence of papilloedema  
38 (3) Continuous or uncontrolled seizures  
39 193 (4) GCS  $\leq$  12  
40  
41

42 194  
43  
44 195 Contra-indications for immediate LP were uncommon and occurred in 299 (20%)  
45  
46 196 patients. Glasgow coma score (GCS)  $\leq$  12 was the most common contra-indication for  
47  
48 197 immediate LP reported in 143 (10%), followed by focal neurological signs in 38 (3%). A  
49  
50 198 further 70 (7%) had other indications to delay LP. Neuroimaging prior to LP happened in 1094  
51  
52 199 of 1158 patients (94%), 911 (83%) of whom had no guideline-specified indication.  
53  
54 200 Neuroimaging was performed a median of 11 hours post arrival at hospital (IQR 4-21). Median  
55  
56  
57  
58  
59  
60

1  
2  
3 201 time from admission to LP was 16.5 hours (IQR 8 – 27). Only 6 patients had an LP within 1  
4  
5 202 hour of arrival at hospital and only 326 (26%) within 8 hours.  
6  
7

8 203 Median time from LP to CSF microscopy was 2 hours (IQR 1.1-3.2). Time from LP to  
9  
10 204 CSF analysis was significantly quicker when performed at on-site laboratories when compared  
11  
12 205 to centralised laboratory processing (median 1.65 hours (IQR 1.0 - 2.8) compared to 2.95 hours  
13  
14 206 (IQR 2.0 - 3.8)  $p < 0.001$ ).  
15  
16

17 207 Fewer than one third of patients had pneumococcal (412, 28%) and meningococcal  
18  
19 208 polymerase chain reaction (PCR) (434, 29.5%) performed on their CSF. Pneumococcal PCR  
20  
21 209 was done on blood in 211 (14%) patients, and meningococcal PCR in 232 (16%). 646 patients  
22  
23 210 (44%) patients had a documented HIV test. Four of these were positive – two of whom had  
24  
25 211 pneumococcal meningitis, one of whom had enteroviral meningitis and one had meningitis of  
26  
27 212 unknown aetiology. Nine patients were previously known to be HIV positive.  
28  
29

30  
31 213 Blood cultures were taken from 66% (n=977) of patients with 45% (n=438) having  
32  
33 214 them taken within one hour of arrival at hospital.  
34  
35

### 36 215 *Treatment*

37  
38 216 285 patients (19%) did not receive antibiotics, most of whom had either viral meningitis  
39  
40 217 (163) or lymphocytic meningitis with no aetiology identified (105). The remaining 1,186  
41  
42 218 patients received at least one dose of antibiotics. The median time from hospital admission to  
43  
44 219 first dose of antibiotics was 3.2 hours (IQR 1.3,9.2). Amongst the patients who received  
45  
46 220 antibiotics the antimicrobials were commenced within an hour of arrival at hospital for  
47  
48 221 approximately one fifth of patients (207/1000). In confirmed bacterial meningitis cases, 92  
49  
50 222 patients (36%) received antibiotics within an hour of arrival.  
51  
52

53  
54 223 Adherence with guideline specified empirical antibiotic regimens was good with 912  
55  
56 224 (80%) receiving a third-generation cephalosporin. Data is missing on antibiotic type for 47  
57  
58 225 patients. Of the 197 patients aged 60 years and over who received antibiotics, 108 (55%)  
59  
60

1  
2  
3 226 received ampicillin or amoxicillin; only 55 (28%) of those had the correct dose and dosing  
4  
5 227 frequency as recommended for *Listeria monocytogenes* meningitis. Similarly, only 36 (31%)  
6  
7  
8 228 of the immunocompromised patients, who were aged under 60, (n=115) received any  
9  
10 229 ampicillin or amoxicillin for anti-*Listeria* cover. Supplementary table 1 shows details regarding  
11  
12 230 risk factors for *Listeria*.

14 231 Only 300 patients (20%) received adjunctive steroids as recommended. Steroids were  
16  
17 232 given more frequently in patient with confirmed bacterial meningitis in 150 (50%) cases. In  
18  
19 233 patients with pneumococcal meningitis 97 patients (57%) received steroids.

#### 21 234 *Clinical outcomes*

23  
24 235 On multivariate analysis, having a confirmed diagnosis of bacterial meningitis was strongly  
25  
26 236 associated with in-hospital mortality. Adjusting for age and sex, confirmed bacterial meningitis  
27  
28 237 was associated with 26 times the odds of in-hospital mortality compared to those with other  
29  
30 238 forms of meningitis (adjusted odds ratio [aOR] 25.9, 95% CI 5.93 – 113.0), including those  
31  
32 239 with no aetiology identified.

35 240 In patients with confirmed bacterial meningitis, on univariate analyses, in-hospital  
36  
37 241 mortality was associated with a positive blood culture (crude odds ratio [cOR] 2.21, 95% CI  
38  
39 242 1.04 – 4.67); GCS  $\leq$  13 (cOR 3.24, 95% CI 1.39 – 7.52), confirmed *Streptococcus pneumoniae*  
40  
41 243 meningitis (cOR 2.37, 95% CI 1.10 – 5.11); and ICU admission (cOR 4.81, 95% CI 1.99 –  
42  
43 244 11.60). These associations remained despite multivariate adjustment for age and sex (table 3).

46 245 The analysis was also conducted using only data from those who had had an LP  
47  
48 246 (supplementary table 2). The association between a positive blood culture and mortality was  
49  
50 247 lost. The association between confirmed pneumococcal aetiology and mortality was  
51  
52 248 approaching statistical significance and the association of ITU admission was maintained.  
53  
54  
55

56 249  
57  
58  
59  
60

**Table 3: Multivariate analysis of the association between baseline co-variates and in-hospital mortality in 303 patients with confirmed bacterial meningitis using logistic regression modelling**

| Baseline co-variate                                                  | N   | In-hospital mortality N (%) <sup>1</sup> | Crude OR for in-hospital mortality (95% CI) | P-value | Adjusted OR for in-hospital mortality (95% CI)* | P-value† |
|----------------------------------------------------------------------|-----|------------------------------------------|---------------------------------------------|---------|-------------------------------------------------|----------|
| <b>Sex</b>                                                           |     |                                          |                                             |         |                                                 |          |
| Male                                                                 | 173 | 26 (15.1)                                | 1                                           |         |                                                 |          |
| Female                                                               | 130 | 12 (9.23)                                | 0.57 (0.27-1.18)                            | 0.13    |                                                 |          |
| <b>Age group</b>                                                     |     |                                          |                                             |         |                                                 |          |
| ≤ 18 years                                                           | 18  | 0 (0)                                    |                                             |         |                                                 |          |
| 19 – 59 years                                                        | 159 | 18 (11.3)                                | 1                                           |         |                                                 |          |
| ≥ 60 years                                                           | 126 | 20 (16.0)                                | 1.49 (0.75 – 2.96)                          | 0.25    |                                                 |          |
| <b>Blood culture positive</b>                                        |     |                                          |                                             |         |                                                 |          |
| No                                                                   | 137 | 11 (8.09)                                | 1                                           |         | 1                                               |          |
| Yes                                                                  | 166 | 27 (16.3)                                | 2.21 (1.04 – 4.67)                          | 0.03    | 1.87 (0.87 – 4.01)                              | 0.10     |
| <b>GCS ≤ 13<sup>2</sup></b>                                          |     |                                          |                                             |         |                                                 |          |
| No                                                                   | 124 | 8 (6.45)                                 | 1                                           |         | 1                                               |          |
| Yes                                                                  | 148 | 27 (18.2)                                | 3.24 (1.39 – 7.52)                          | 0.004   | 2.90 (1.26 – 6.71)                              | 0.008    |
| <b>IV dexamethasone given<sup>3</sup></b>                            |     |                                          |                                             |         |                                                 |          |
| No                                                                   | 149 | 23 (15.4)                                | 1                                           |         | 1                                               |          |
| Yes                                                                  | 150 | 14 (9.40)                                | 0.57 (0.27 – 1.16)                          | 0.11    | 0.57 (0.28 – 1.17)                              | 0.12     |
| <b>IV dexamethasone given if <i>Strep.pneumoniae</i><sup>4</sup></b> |     |                                          |                                             |         |                                                 |          |
| No                                                                   | 73  | 16 (21.9)                                | 1                                           |         | 1                                               |          |
| Yes                                                                  | 97  | 11 (11.5)                                | 0.46 (0.20 – 1.08)                          | 0.07    | 0.47 (0.20 – 1.10)                              | 0.08     |
| <b>Final diagnosis <i>S. pneumoniae</i></b>                          |     |                                          |                                             |         |                                                 |          |
| No                                                                   | 131 | 10 (7.63)                                | 1                                           |         | 1                                               |          |
| Yes                                                                  | 172 | 28 (16.4)                                | 2.37 (1.10 – 5.11)                          | 0.02    | 2.08 (0.96 – 4.48)                              | 0.05     |
| <b>ITU admission<sup>5</sup></b>                                     |     |                                          |                                             |         |                                                 |          |
| No                                                                   | 144 | 7 (4.86)                                 | 1                                           |         | 1                                               |          |
| Yes                                                                  | 157 | 31 (19.7)                                | 4.81 (1.99 – 11.60)                         | < 0.001 | 4.28 (1.81 – 10.1)                              | < 0.001  |

\*adjusted for sex and age group  
† P-value from LRT comparing models with and without primary exposure variable  
1 = One participant had missing outcome data  
2 = 31/303 (10%) participants did not have a GCS recorded  
3 = 4/303 (1%) participants had missing data on IV dexamethasone administration  
4 = 2/172 (1%) participants with confirmed *S. pneumoniae* meningitis had missing data on IV dexamethasone administration  
5 = 1/303 (0.3%) participants had missing data on ITU admission

250

251 On both univariate and multivariate analyses (adjusted for age and sex), in patients with  
252 confirmed bacterial meningitis, the administration of dexamethasone was associated with a  
253 reduction in in-hospital mortality (aOR 0.57, 95% CI 0.28 – 1.17, p 0.12). When this analysis  
254 was restricted to include only those with confirmed *Streptococcus pneumoniae* meningitis,  
255 those who received dexamethasone had a reduced odds of in-hospital mortality (aOR 0.47,  
256 95% CI 0.20 – 1.10, p 0.08). Neither association reached statistical significance. This analysis

1  
2  
3 257 was also performed including the patients assumed to have bacterial meningitis according to  
4  
5 258 the Spanos criteria (supplementary table 3).

7  
8 259 **Discussion**

9 260  
10 261 This large national study evaluated clinical management of adults with community acquired  
11  
12 262 meningitis throughout the UK and Ireland. Current practice falls short of the recommendations  
13  
14 263 in the 2016 UK guidelines(6). This is a concern for all patients but is of a particular worry in  
15  
16 264 bacterial meningitis. The management of bacterial meningitis is time critical(4, 16). Delays in  
17  
18 265 receiving antibiotics and having an LP, the unnecessary use of brain imaging, a lack of  
19  
20 266 appropriate antibiotics in those at risk of *Listeria* and the low rate of steroid administration are  
21  
22 267 areas for significant improvement.

23  
24  
25  
26 268 Most patients were given antibiotics prior to LP. Even taking this into consideration,  
27  
28 269 the median door to antibiotic time was over three hours. The optimal timing of antibiotics in  
29  
30 270 bacterial meningitis is not known precisely but we do know that delays lead to increased  
31  
32 271 mortality (4, 5, 16). A delay of over three hours has been associated with a 14-fold increase  
33  
34 272 risk of death(16).

35  
36  
37 273 Delays in obtaining CSF are associated with a reduction in pathogen detection,  
38  
39 274 increased exposure to unnecessary anti-infectives, prolonged hospital stays and increased  
40  
41 275 mortality (4, 6, 17). In most cases brain imaging is not indicated in adults with suspected  
42  
43 276 community-acquired meningitis (4) however, in our cohort, a significant number of patients  
44  
45 277 had unnecessary scans. Although complications following LP are rare(18, 19), there may be an  
46  
47 278 unfounded fear of cerebral herniation following LP, even in those with no clinical features of  
48  
49 279 brain shift, which is leading to excessive use of imaging(20). Education programs, along with  
50  
51 280 quality improvement measures, are essential to reduce the potentially harmful overuse of  
52  
53 281 neuroloimaging. Additionally, it is essential that we optimise care pathways to ensure that  
54  
55  
56  
57  
58  
59  
60

1  
2  
3 282 clinicians have the time, space and equipment required to performed LPs in a timely and safe  
4  
5 283 manner (3, 21).  
6

7  
8 284 CSF culture positivity rates decline substantially when LP is delayed (3, 17). PCR can  
9  
10 285 detect bacterial DNA in CSF for several days after antibiotics have been administered. In the  
11  
12 286 UK half of meningococcal disease is diagnosed on PCR alone(22). It is alarming that PCR was  
13  
14 287 used, in our cohort, as a diagnostic modality in so few patients. Meningitis specific  
15  
16 288 investigation order-sets using electronic ordering, and/or reflex laboratory testing to increase  
17  
18 289 use of molecular diagnostics should be considered to reduce opportunities for missed  
19  
20 290 microbiological diagnoses. There is the potential for increased use of rapid technologies that  
21  
22 291 can be used on site with minimal technical skill required(23). Having rapid tests on site has  
23  
24 292 been shown to reduce bed days with significant cost savings(24). Further research evaluating  
25  
26 293 rapid diagnostic tests in other types of meningitis with clinically relevant outcomes is needed.  
27  
28 294 We also need to increase the offer of HIV testing in patients with meningitis, as less than half  
29  
30 295 the patients had a documented HIV test. Incident HIV diagnoses were made in our cohort  
31  
32 296 amongst patients presenting with bacterial, viral, and unknown cause meningitis.  
33  
34  
35  
36

37 297 There is good evidence that corticosteroids reduce mortality in pneumococcal  
38  
39 298 meningitis with no clinically significant increase in adverse events in other causes of meningitis  
40  
41 299 (25). Empirical steroids should be given for all adults with suspected bacterial meningitis. In  
42  
43 300 our study, we saw a reduction in mortality in patients with pneumococcal meningitis who were  
44  
45 301 given steroids, whilst this survival benefit did not reach statistical significance, this was likely  
46  
47 302 due to a type two error and the small sample of confirmed pneumococcal meningitis cases. It  
48  
49 303 is of concern that well-evidenced, well-established therapies known to improve outcome,  
50  
51 304 including mortality, are only being given to just over half those who might benefit. A  
52  
53 305 protocolised, goal-directed bundle, including the use of corticosteroids and appropriate  
54  
55 306 antibiotics warrants evaluation in the UK. There were clear differences between centres in our  
56  
57  
58  
59  
60

1  
2  
3 307 study with one centre administering steroids to 26/42 (63%) of their patients and another giving  
4  
5 308 them to none. It is possible that those centres that adhered to the recommendation to give  
6  
7 309 steroids may also have adhered to other aspects of the guidelines more often as well,  
8  
9  
10 310 contributing to improved outcomes.

11  
12 311 Although this is a large multi-national study, there are limitations. NHS trusts self-  
13  
14 312 selected themselves for inclusion, we cannot rule out any significant differences with trusts that  
15  
16 313 did not. However, 64 hospitals were included with good representation throughout the nations  
17  
18 314 of the UK (and Ireland). We don't think any potential selection bias limits the generalisability  
19  
20 315 of our findings. We used well-established, published case definitions of meningitis to minimise  
21  
22 316 information bias, however misclassification of cases remains possible especially in the cases  
23  
24 317 without a confirmed microbiological diagnosis. Our case definitions allowed us to include  
25  
26 318 anyone suspected of having meningitis (of any cause) as objectively it is often difficult to  
27  
28 319 differentiate between viral and bacterial meningitis at the point of initial assessment. However,  
29  
30 320 it is possible that there may have been differences in presentation between those with confirmed  
31  
32 321 bacterial meningitis, those with confirmed viral meningitis and those with no confirmed  
33  
34 322 aetiology that meant they were managed in different ways. This study was not powered to look  
35  
36 323 at the differences between all the different aetiologies. Finally, because this was a retrospective  
37  
38 324 study, our analysis may have been subject to errors resulting from recall bias and missing data.  
39  
40 325 A prospective national study would have been challenging to execute and it is likely that there  
41  
42 326 would have been ascertainment bias in time and geography. We therefore believe that, due to  
43  
44 327 the large sample size along with the use of electronic hospital coding and laboratory data to  
45  
46 328 ascertain cases, the risk of recall bias is low, and our retrospective data is representative of  
47  
48 329 practice within the UK.

49  
50 330 There is a clear need to better understand the sub-optimal guideline adherence reported  
51  
52 331 here. Although there has been research regarding primary care practice there has not been any  
53  
54  
55  
56  
57  
58  
59  
60

1  
2  
3 332 evaluation of exactly where delays occur and what the barriers are to achieving good practice  
4  
5 333 in secondary care(26, 27). A small questionnaire based study identified the inability to find  
6  
7 334 correct equipment, lack of time and/or paucity of appropriately trained staff as potential barriers  
8  
9 335 to performing timely lumbar puncture for the investigation of neurological infections(21).  
10  
11

12 336 Non-meningitis specific research evaluating barriers and facilitators to adhering to  
13  
14 337 clinical guidelines, report a lack of awareness or familiarity with the guidelines, as well as  
15  
16 338 disagreement with the content may both be important(28). External barriers such as equipment  
17  
18 339 and staffing were also identified which agrees with the limited research that there is in  
19  
20 340 neurological infections. There is observational evidence from other countries of improvements  
21  
22 341 in practice and outcome following implementation of guidelines (12, 29).  
23  
24

25 342 The patient journey in the UK normally starts with being admitted via an emergency  
26  
27 343 department or acute medical unit where clinicians may not be as familiar with the guidelines  
28  
29 344 and evidence as specialists. There is some evidence, both within meningitis and other infectious  
30  
31 345 diseases that management is improved by being looked after by a specialist. There is an expert  
32  
33 346 recommendation within the current UK guidelines that patients with meningitis should be  
34  
35 347 looked after with input of an infection specialist.  
36  
37  
38  
39

40 348 In conclusion this is, to our knowledge, the largest UK study of adult patients with  
41  
42 349 meningitis. Awareness of practice guidelines for relatively rare acute medical conditions such  
43  
44 350 as meningitis is low and this study has demonstrated that despite clear, freely accessible  
45  
46 351 guidelines, clinical care is not in line with evidence-based recommendations. There is  
47  
48 352 considerable room for improvement. Whilst we recognise that guidelines do not improve  
49  
50 353 practice on their own, we do recommend that the findings from this study are strongly  
51  
52 354 considered in the development of the new National Institute for Clinical Excellence (NICE)  
53  
54 355 guideline on meningitis currently being developed, which for the first time, will include  
55  
56 356 guidance for adult patients as well as children. Given the widespread adoption of NICE  
57  
58  
59  
60



1  
2  
3 357 endorsed guidelines and quality standards to improve the quality of clinical practice in the UK,  
4  
5 358 we anticipate that a NICE guideline will improve awareness and uptake of good practice in the  
6  
7  
8 359 short term. In addition to education, which has limited impact on changing behaviour, UK  
9  
10 360 hospitals should use quality improvement methods to improve management of patients with  
11  
12 361 suspected meningitis. Good qualitative research to identify what the barriers to implementing  
13  
14 362 the guidelines should also be done.

15  
16  
17 363 We suggest a national strategic improvement plan should focus on the following key  
18  
19 364 areas: timely use of diagnostics; appropriate antibiotics in at risk populations and the use of  
20  
21 365 adjunctive steroids. The integrated use of electronic systems to standardize optimal use of  
22  
23 366 diagnostics, and management bundles may offer additional opportunities to improve outcomes.  
24  
25  
26 367 Each site that has been involved in this study has been asked to implement site specific changes  
27  
28 368 and re-evaluate for any improvements in practice.

29  
30  
31 369  
32  
33  
34  
35  
36  
37  
38  
39  
40  
41  
42  
43  
44  
45  
46  
47  
48  
49  
50  
51  
52  
53  
54  
55  
56  
57  
58  
59  
60

## 370 **Contributors**

371 Ellis J: Methodology, Data collection and curation, formal analysis, Investigation, Writing –  
372 Original Draft Preparation. Harvey D: Methodology including pilot data, data collection,  
373 reviewing and approving final draft. Defres S: Methodology including development of original  
374 audit tool and guidelines, data collection, reviewing and approving final draft. Chandna A:  
375 Methodology, reviewing and approving final draft. Maclachlan E: Methodology, data  
376 collection, reviewing and approving final draft. Solomon T: Methodology including  
377 development of original guidelines and audit tool, reviewing and approving final draft.  
378 Heyderman RS: Conceptualization, Methodology, Supervision, Writing – Review & Editing.  
379 McGill F: Conceptualization, Methodology, Data collection and curation, Investigation, formal  
380 analysis, Writing –Original Draft Preparation. Responsible for overall content as guarantor.  
381 The corresponding author attests that all listed authors meet authorship criteria and that no  
382 others meeting the criteria have been omitted. The lead author and corresponding author affirm  
383 that the manuscript is an honest, accurate, and transparent account of the study; no important  
384 aspects of the study have been omitted.

385 The appendix includes a list of other contributors in the National Audit of Meningitis  
386 Management (NAMM) group.

387 The Corresponding Author has the right to grant on behalf of all authors and does grant  
388 on behalf of all authors, a worldwide licence to the Publishers and its licensees in perpetuity,  
389 in all forms, formats and media (whether known now or created in the future), to i) publish,  
390 reproduce, distribute, display and store the Contribution, ii) translate the Contribution into other  
391 languages, create adaptations, reprints, include within collections and create summaries,  
392 extracts and/or, abstracts of the Contribution, iii) create any other derivative work(s) based on  
393 the Contribution, iv) to exploit all subsidiary rights in the Contribution, v) the inclusion of  
394 electronic links from the Contribution to third party material where-ever it may be located; and,  
395 vi) licence any third party to do any or all of the above.

396

## 397 **Competing interests**

398 All authors have completed the ICMJE uniform disclosure form  
399 at [www.icmje.org/coi\\_disclosure.pdf](http://www.icmje.org/coi_disclosure.pdf) and declare: no support from any organisation for the  
400 submitted work; no financial relationships with any organisations that might have an interest  
401 in the submitted work in the previous three years; no other relationships or activities that  
402 could appear to have influenced the submitted work.

403

1  
2  
3  
4 404 **Acknowledgments**

5 405 TS is supported by the National Institute for Health Research (NIHR) Health Protection  
6  
7 406 Research Unit in Emerging and Zoonotic Infections (Grant No. NIHR200907), NIHR Global  
8  
9 407 Health Research Group on Brain Infections (No. 17/63/110), and the UK Medical Research  
10 408 Council's Global Effort on COVID-19 Programme (MR/V033441/1)  
11

12 409  
13  
14 410 **Funding**

15 411 This research received no specific grant from any funding agency in the public, commercial  
16  
17 412 or not-for-profit sector.  
18

19 413  
20 414 **Data availability statement**

21  
22 415 Data can be made available to other researchers on reasonable request to the authors.  
23  
24  
25  
26  
27  
28  
29  
30  
31  
32  
33  
34  
35  
36  
37  
38  
39  
40  
41  
42  
43  
44  
45  
46  
47  
48  
49  
50  
51  
52  
53  
54  
55  
56  
57  
58  
59  
60

416

For peer review only

1  
2  
3  
4  
5  
6  
7  
8  
9  
10  
11  
12  
13  
14  
15  
16  
17  
18  
19  
20  
21  
22  
23  
24  
25  
26  
27  
28  
29  
30  
31  
32  
33  
34  
35  
36  
37  
38  
39  
40  
41  
42  
43  
44  
45  
46  
47  
48  
49  
50  
51  
52  
53  
54  
55  
56  
57  
58  
59  
60

**References**

1. van de Beek D, de Gans J, Spanjaard L, Weisfelt M, Reitsma JB, Vermeulen M. Clinical Features and Prognostic Factors in Adults with Bacterial Meningitis. *N Engl J Med*. 2004;351:1849-59.
2. Okike IO, Ribeiro S, Ramsay M, Heath PT, Sharland M, Ladhani SN. Trends in bacterial, mycobacterial and fungal meningitis in England and Wales 2004-11: an observational study. *Lancet Infect Dis*. 2014;14:301-7.
3. McGill F, Griffiths MJ, Bonnett LJ, Geretti AM, Michael BD, Beeching NJ, et al. Incidence, aetiology, and sequelae of viral meningitis in UK adults: a multicentre prospective observational cohort study. *Lancet Infect Dis*. 2018;18(9):992-1003.
4. Proulx N, Frechette D, Toye B, Chan J, Kravcik S. Delays in the administration of antibiotics are associated with mortality from acute bacterial meningitis. *QJM*. 2005;98:291-8.
5. Bodilsen J, Dalager-Pedersen M, Schonheyder HC, Nielsen H. Time to antibiotic therapy and outcome in bacterial meningitis: a Danish population-based cohort study. *BMC Infect Dis*. 2016;16(392):1-7.
6. McGill F, Heyderman RS, Michael BD, Defres S, Beeching NJ, Borrow R, et al. The UK joint specialist societies guideline on the diagnosis and management of acute meningitis and meningococcal sepsis in immunocompetent adults. *J Infect*. 2016;72(4):405-38.
7. Stockdale AJ, Weekes MP, Aliyu SH. An audit of acute bacterial meningitis in a large teaching hospital 2005-10. *QJM*. 2011;104(12):1055-63.
8. Cullen MM. An audit of the investigation and initial management of adults presenting with possible bacterial meningitis. *J Infect*. 2005;50:120-4.
9. Brouwer M, van de Beek D. Viral meningitis in the UK: time to speed up. *Lancet Infectious Diseases*. 2018;18(9):930-1.
10. Kadambari S, Okike I, Ribeiro S, Ramsay ME, Heath PT, Sharland M, et al. Seven-fold increase in viral meningo-encephalitis reports in England and Wales during 2004-2013. *J Infect*. 2014;69(4):326-32.
11. McGill F, Tokarz R, Thomson EC, Filipe A, Sameroff S, Jain K, et al. Viral capture sequencing detects unexpected viruses in the cerebrospinal fluid of adults with meningitis. *Journal of Infection*. 2022;84(4):499-510.
12. Glimåker M, Johansson B, Grindborg Ö, Bottai M, Lindquist L, Sjölin J. Adult Bacterial Meningitis: Earlier Treatment and Improved Outcome Following Guideline Revision Promoting Prompt Lumbar Puncture. *Clin Infect Dis*. 2015;60(8):1162-9.
13. Public Health England. UK Standards for Microbiology Investigations. Investigation of Cerebrospinal fluid. 2017.
14. The Kings Fund. NHS hospital bed numbers: past, present, future 2021 [Available from: <https://www.kingsfund.org.uk/publications/nhs-hospital-bed-numbers>].
15. Spanos A, Harrell FE, Durack DT. Differential Diagnosis of Acute Meningitis. An Analysis of the Predictive Value of Initial Observations. *JAMA*. 1989;262(19):2700-7.
16. Auburtin M, Wolff M, Charpentier J, Varon E, Tulzo YL, Girault C, et al. Detrimental role of delayed antibiotic administration and penicillin-nonsusceptible strains in adult intensive care unit patients with pneumococcal meningitis: The PNEUMOREA prospective multicenter study. *Crit Care Medicine*. 2006;34:2758-65.
17. Michael B, Menezes BF, Cunniffe J, Miller A, Kneen R, Francis G, et al. Effect of delayed lumbar punctures on the diagnosis of acute bacterial meningitis in adults. *Emerg Med J*. 2010;27(6):433-8.
18. Costerus JM, Brouwer MC, Sprengers MES, Roosendaal SD, van der Ende A, van de Beek D. Cranial Computed Tomography, Lumbar Puncture, and Clinical Deterioration in Bacterial Meningitis: A Nationwide Cohort Study. *Clin Infect Dis*. 2018;67(6):920-6.
19. Costerus JM, Brouwer MC, van de Beek D. Technological advances and changing indications for lumbar puncture in neurological disorders. *Lancet Neurol* 2018;17(3):268-78.

- 1  
2  
3 469 20. Glimaker M, Johansson B, Bell M, Ericsson M, Blackberg J, Brink M, et al. Early Lumbar  
4 470 Puncture in adult bacterial meningitis - rationale for revised guidelines. *Scand J Infect Dis.*  
5 471 2013;45:657-63.  
6 472 21. Defres S, Mayer J, Backman R, Kneen R. Performing lumbar punctures for suspected CNS  
7 473 infections: experience and practice of trainee doctors. *Br J Hosp Med.* 2015;76(11):658-62.  
8 474 22. Heinsbroek E, Ladhani SN, Gray S, Guiver M, Kaczmarski E, Borrow R, et al. Added value of  
9 475 PCR testing for confirmation of invasive meningococcal disease in England. *J Infect.* 2013;67:385-90.  
10 476 23. Bouzid D, Zanella MC, Kerneis S, Visseaux B, May L, Schrenzel J, et al. Rapid diagnostic tests  
11 477 for infectious diseases in the emergency department. *Clinical microbiology and infection : the official  
12 478 publication of the European Society of Clinical Microbiology and Infectious Diseases.* 2020.  
13 479 24. Giuleri SG, Chapuis-Taillard C, Manuel O, Hugli O, Pinget C, Wasserfallen JB, et al. Rapid  
14 480 detection of enterovirus in cerebrospinal fluid by a fully automated PCR assay is associated with  
15 481 improved management of aseptic meningitis in adult patients. *J Clin Virol.* 2015;62:58-62.  
16 482 25. de Gans J, van de Beek D, European Dexamethasone in Adulthood Bacterial Meningitis Study  
17 483 Investigators. Dexamethasone in Adults with Bacterial Meningitis. *N Engl J Med.* 2002;347(20):1549-  
18 484 56.  
19 485 26. Brennan CA, Somerset M, Granier SK, Fahey TP, Heyderman RS. Management of diagnostic  
20 486 uncertainty in children with possible meningitis: a qualitative study. *Br J Gen Pract.* 2003;53:626-31.  
21 487 27. Granier S, Owen P, Pill R, Jacobson L. Recognising meningococcal disease in primary care:  
22 488 qualitative study of how general practitioners process clinical and contextual information. *BMJ.*  
23 489 1998;316:276-9.  
24 490 28. Barth JH, Misra S, Moberg Aakre K, Langlois MR, Watine J, Twomey PJ, et al. Why are clinical  
25 491 practice guidelines not followed? *Clinical chemistry and laboratory medicine.* 2016;54(7):1133-39.  
26 492 29. Costerus JM, Brouwer MC, Bijlsma MW, Tanck MW, van der Ende A, van de Beek D. Impact  
27 493 of an evidence-based guideline on the management of community-acquired bacterial meningitis: a  
28 494 prospective cohort study. *Clinical microbiology and infection : the official publication of the  
29 495 European Society of Clinical Microbiology and Infectious Diseases.* 2016;22(11):928-33.

30  
31  
32  
33  
34 496  
35  
36  
37  
38  
39  
40  
41  
42  
43  
44  
45  
46  
47  
48  
49  
50  
51  
52  
53  
54  
55  
56  
57  
58  
59  
60

Supplementary table 1 . Risk factors for Listeria stratified by aetiology.

|                                                        | Total cohort<br>N (%) | Bacterial<br>meningitis<br>N (%) | Viral meningitis<br>N (%) | Other<br>meningitis <sup>†</sup><br>N (%) | P value |
|--------------------------------------------------------|-----------------------|----------------------------------|---------------------------|-------------------------------------------|---------|
| <b>N</b>                                               | 1,471 (100)           | 302 (21)                         | 615 (42)                  | 553 (38)                                  | -       |
| <b>Age &gt;60 years</b>                                | 235 (16)              | 126 (42)                         | 27 (4)                    | 79 (14)                                   | <0.001  |
| <b>Number immunocompromised by disease/medication*</b> | 60 (4)                | 14 (5)                           | 18 (3)                    | 28 (5)                                    | 0.23    |
| <b>Number with Diabetes mellitus</b>                   | 64 (4)                | 30 (10)                          | 11 (2)                    | 22 (4)                                    | <0.001  |
| <b>Number with a history of alcohol excess</b>         | 36 (2)                | 21 (7)                           | 3 (0.5)                   | 12 (2)                                    | <0.001  |

<sup>†</sup>= other meningitis category included all patients without a confirmed bacterial or viral pathogen

\*=Conditions listed as immunocompromising conditions included haematological malignancy (n=8), Other malignancy (n=8), solid organ transplant (n=6), liver cirrhosis (n=1), HIV (n=9), Pregnancy (n=2). Medication listed included Steroids (n=7), tocilizumab, ecolizumab and infliximab (n=6), Methotrexate (n=8), Mycophenolate (n=2), Azathioprine (n=3), 'chemotherapy' (n=4). (some patients had more than one immunocompromising condition/medication).

**Supplementary table 2: Multivariate analysis of the association between baseline co-variables and in-hospital mortality in 266 patients with bacterial meningitis confirmed by CSF analysis using logistic regression modelling:**

| Baseline co-variate                                                  | N   | In-hospital mortality N (%) <sup>1</sup> | Crude OR for in-hospital mortality (95% CI) | P-value | Adjusted OR for in-hospital mortality (95% CI)* | P-value† |
|----------------------------------------------------------------------|-----|------------------------------------------|---------------------------------------------|---------|-------------------------------------------------|----------|
| <b>Sex</b>                                                           |     |                                          |                                             |         |                                                 |          |
| Male                                                                 | 147 | 15 (10.2)                                | 1                                           |         |                                                 |          |
| Female                                                               | 118 | 7 (5.93)                                 | 0.55 (0.22-1.42)                            | 0.21    |                                                 |          |
| <b>Age group</b>                                                     |     |                                          |                                             |         |                                                 |          |
| ≤ 18 years                                                           | 16  | 0 (0)                                    | -                                           |         |                                                 |          |
| 19 – 59 years                                                        | 136 | 10 (7.35)                                | 1                                           |         |                                                 |          |
| ≥ 60 years                                                           | 113 | 12 (10.6)                                | 1.50 (0.62-3.61)                            | 0.37    |                                                 |          |
| <b>Blood culture positive</b>                                        |     |                                          |                                             |         |                                                 |          |
| No                                                                   | 130 | 8 (6.15)                                 | 1                                           |         | 1                                               |          |
| Yes                                                                  | 135 | 14 (10.4)                                | 1.76 (0.71-4.38)                            | 0.21    | 1.46 (0.58-3.71)                                | 0.42     |
| <b>GCS ≤ 13<sup>2</sup></b>                                          |     |                                          |                                             |         |                                                 |          |
| No                                                                   | 106 | 3 (2.83)                                 | 1                                           |         | 1                                               |          |
| Yes                                                                  | 132 | 17 (12.9)                                | 5.05 (1.41-18.2)                            | 0.006   | 4.41 (1.24-15.7)                                | 0.009    |
| <b>IV dexamethasone given<sup>3</sup></b>                            |     |                                          |                                             |         |                                                 |          |
| No                                                                   | 124 | 10 (8.06)                                | 1                                           |         | 1                                               |          |
| Yes                                                                  | 137 | 11 (8.03)                                | 0.99 (0.41-2.43)                            | 0.99    | 1.02 (0.41-2.52)                                | 0.96     |
| <b>IV dexamethasone given if <i>Strep.pneumoniae</i><sup>4</sup></b> |     |                                          |                                             |         |                                                 |          |
| No                                                                   | 62  | 8 (12.9)                                 | 1                                           |         | 1                                               |          |
| Yes                                                                  | 89  | 8 (8.99)                                 | 0.67 (0.23-1.89)                            | 0.44    | 0.68 (0.24-1.94)                                | 0.48     |
| <b>Final diagnosis <i>S. pneumoniae</i></b>                          |     |                                          |                                             |         |                                                 |          |
| No                                                                   | 107 | 5 (4.46)                                 | 1                                           |         | 1                                               |          |
| Yes                                                                  | 136 | 17 (11.1)                                | 2.67 (0.95-7.55)                            | 0.05    | 2.37 (0.84-6.67)                                | 0.08     |
| <b>ITU admission<sup>5</sup></b>                                     |     |                                          |                                             |         |                                                 |          |
| No                                                                   | 129 | 4 (3.01)                                 | 1                                           |         | 1                                               |          |
| Yes                                                                  | 113 | 18 (13.7)                                | 5.14 (1.65-16.0)                            | 0.002   | 4.44 (1.44-13.6)                                | 0.003    |

\*adjusted for sex and age group

† P-value from LRT comparing models with and without primary exposure variable

1 = One participant had missing outcome data

2 = 28/266 (10%) participants did not have a GCS recorded

3 = 4/266 (1%) participants had missing data on IV dexamethasone administration

4 = 2/154 (1%) participants with confirmed *S. pneumoniae* meningitis had missing data on IV dexamethasone administration

5 = 2/266 (0.7%) participants had missing data on ITU admission



**Supplementary table 3: Multivariate analysis of the association between baseline co-variates and in-hospital mortality in 359 patients with bacterial meningitis using the Spanos criteria<sup>^</sup> using logistic regression modelling:**

| Baseline co-variant                                                  | N   | In-hospital mortality N (%) <sup>1</sup> | Crude OR for in-hospital mortality (95% CI) | P-value | Adjusted OR for in-hospital mortality (95% CI)* | P-value <sup>†</sup> |
|----------------------------------------------------------------------|-----|------------------------------------------|---------------------------------------------|---------|-------------------------------------------------|----------------------|
| <b>Sex</b>                                                           |     |                                          |                                             |         |                                                 |                      |
| Male                                                                 | 199 | 28 (14.1)                                | 1                                           |         |                                                 |                      |
| Female                                                               | 159 | 13 (8.18)                                | 0.54 (0.27-1.09)                            | 0.08    |                                                 |                      |
| <b>Age group</b>                                                     |     |                                          |                                             |         |                                                 |                      |
| ≤ 18 years                                                           | 21  | 0 (0)                                    | -                                           |         |                                                 |                      |
| 19 – 59 years                                                        | 192 | 18 (9.38)                                | 1                                           |         |                                                 |                      |
| ≥ 60 years                                                           | 145 | 23 (15.9)                                | 1.82 (0.94-3.52)                            | 0.07    |                                                 |                      |
| <b>Blood culture positive</b>                                        |     |                                          |                                             |         |                                                 |                      |
| No                                                                   | 188 | 14 (7.45)                                | 1                                           |         | 1                                               |                      |
| Yes                                                                  | 170 | 27 (15.9)                                | 2.35 (1.18-4.68)                            | 0.01    | 1.93 (0.96-3.89)                                | 0.06                 |
| <b>GCS ≤ 13<sup>2</sup></b>                                          |     |                                          |                                             |         |                                                 |                      |
| No                                                                   | 163 | 9 (5.52)                                 | 1                                           |         | 1                                               |                      |
| Yes                                                                  | 156 | 28 (17.9)                                | 3.74 (1.67-8.36)                            | <0.001  | 3.19 (1.44-7.09)                                | 0.003                |
| <b>IV dexamethasone given<sup>3</sup></b>                            |     |                                          |                                             |         |                                                 |                      |
| No                                                                   | 189 | 26 (13.8)                                | 1                                           |         | 1                                               |                      |
| Yes                                                                  | 162 | 14 (8.64)                                | 0.59 (0.30-1.18)                            | 0.13    | 0.57 (0.28-1.14)                                | 0.11                 |
| <b>IV dexamethasone given if <i>Strep.pneumoniae</i><sup>4</sup></b> |     |                                          |                                             |         |                                                 |                      |
| No                                                                   | 73  | 16 (21.9)                                | 1                                           |         | 1                                               |                      |
| Yes                                                                  | 96  | 11 (11.5)                                | 0.46 (0.19-1.08)                            | 0.07    | 0.47 (0.20-1.10)                                | 0.08                 |
| <b>Final diagnosis <i>S. pneumoniae</i></b>                          |     |                                          |                                             |         |                                                 |                      |
| No                                                                   | 187 | 13 (6.95)                                | 1                                           |         | 1                                               |                      |
| Yes                                                                  | 171 | 28 (16.4)                                | 2.62 (1.30-5.29)                            | 0.005   | 2.29 (1.14-4.63)                                | 0.02                 |
| <b>ITU admission<sup>5</sup></b>                                     |     |                                          |                                             |         |                                                 |                      |
| No                                                                   | 192 | 9 (4.69)                                 | 1                                           |         | 1                                               |                      |
| Yes                                                                  | 163 | 32 (19.6)                                | 4.97 (2.24-11.0)                            | <0.001  | 4.43 (2.03-9.68)                                | <0.001               |

\*adjusted for sex and age group

<sup>†</sup> P-value from LRT comparing models with and without primary exposure variable

1 = One participant had missing outcome data

2 = 40/359 (11%) participants did not have a GCS recorded

3 = 7/359 (2%) participants had missing data on IV dexamethasone administration

4 = 2/172 (1%) participants with confirmed *S. pneumoniae* meningitis had missing data on IV dexamethasone administration

5 = 4/359 (1%) participants had missing data on ITU admission

<sup>^</sup> - Spanos criteria use various parameters to allow patients who have not had an aetiological agent to be assumed to be likely bacterial in nature.

1  
2  
3  
4  
5  
6  
7  
8  
9  
10  
11  
12  
13  
14  
15  
16  
17  
18  
19  
20  
21  
22  
23  
24  
25  
26  
27  
28  
29  
30  
31  
32  
33  
34  
35  
36  
37  
38  
39  
40  
41  
42  
43  
44  
45  
46  
47  
48  
49  
50  
51  
52  
53  
54  
55  
56  
57  
58  
59  
60

| Site of Data collection                                                              | Names and Grades (at time of data collection) of contributors | Number of patients' data contributed |
|--------------------------------------------------------------------------------------|---------------------------------------------------------------|--------------------------------------|
| Birmingham Heartlands Hospital, University Hospitals Birmingham NHS Foundation Trust | Amy Chue, SpR<br>Ed Moran, Consultant<br>Karishma Gokani, CMT | 60                                   |
| North Manchester General Hospital                                                    | Joseph Thompson, SpR                                          | 54                                   |
| North Manchester General Hospital                                                    | Katherine Ajdukiewicz, Consultant                             | 54                                   |
| Oxford University Hospitals                                                          | Victoria Ward, SpR                                            | 50                                   |
| Oxford University Hospitals                                                          | Lucinda Barrett, Consultant                                   | 50                                   |
| Cheltenham General Hospital                                                          | Frances Edwards, CMT                                          | 47                                   |
| Cheltenham General Hospital                                                          | Adam Usher, Consultant                                        | 47                                   |
| Royal Alexandra Hospital, Paisley                                                    | Mairi McLeod, Consultant                                      | 45                                   |
| Royal Alexandra Hospital, Paisley                                                    | Ramandeep Singh, medical student                              | 45                                   |
| Royal Alexandra Hospital, Paisley                                                    | Su su Htwe, SpR                                               | 45                                   |
| Leicester Royal Infirmary, Leicester                                                 | Benedict Rogers, SpR                                          | 42                                   |
| Leicester Royal Infirmary, Leicester                                                 | Grace Duane, Medical Student                                  | 42                                   |
| Leicester Royal Infirmary, Leicester                                                 | Martin Wiselka, Consultant                                    | 42                                   |
| Leicester Royal Infirmary, Leicester                                                 | Nicholas Wong, SpR                                            | 42                                   |
| NHS Lothian                                                                          | Elen Vink, SpR                                                | 42                                   |
| NHS Lothian                                                                          | Jennifer Poyner, SpR                                          | 42                                   |
| NHS Lothian                                                                          | Jenni Crane, Consultant                                       | 42                                   |
| NHS Lothian                                                                          | Ollie Lloyd, SpR                                              | 42                                   |
| NHS Lothian                                                                          | Emma Chisholm, SpR                                            | 42                                   |
| Countess of Chester Hospital                                                         | Ildiko Kustos, Consultant                                     | 40                                   |
| Countess of Chester Hospital                                                         | Ruth McEwen, Consultant                                       | 40                                   |
| Countess of Chester Hospital                                                         | Sam Sutton, CMT                                               | 40                                   |
| University Hospitals Plymouth Trust                                                  | Lewis Jones, Consultant                                       | 38                                   |
| University Hospitals Plymouth Trust                                                  | Robert Tilley, Consultant                                     | 38                                   |
| Addenbrookes hospital, Cambridge University Hospitals NHS Foundation Trust           | M. Estee Torok, Honorary Consultant                           | 37                                   |
| Addenbrookes hospital, Cambridge University Hospitals NHS Foundation Trust           | Isobel Ramsay, SpR                                            | 37                                   |
| Hull University Teaching Hospitals NHS Trust                                         | Monica Ivan, Consultant                                       | 36                                   |
| Hull University Teaching Hospitals NHS Trust                                         | Joshua York                                                   | 36                                   |
| Hull University Teaching Hospitals NHS Trust                                         | Jennifer Ansett                                               | 36                                   |
| Hull University Teaching Hospitals NHS Trust                                         | Maithili Varadarajan                                          | 36                                   |
| Hull University Teaching Hospitals NHS Trust                                         | Celestine Eshiwe, SpR                                         | 36                                   |
| London King's College                                                                | Amanda Fife, Consultant                                       | 36                                   |
| London King's College                                                                | Stephanie Harris, SpR                                         | 36                                   |
| London King's College                                                                | Ryan Jayesinghe, medical student                              | 36                                   |
| London King's College                                                                | Priya Sekhon                                                  | 36                                   |
| Aintree University Hospital, Liverpool                                               | James Cruise, SpR                                             | 35                                   |
| Aintree University Hospital, Liverpool                                               | Susan Larkin, Consultant                                      | 35                                   |
| Worcestershire Royal Hospital                                                        | Shivani Kanabar, Medical student                              | 35                                   |
| Worcestershire Royal Hospital                                                        | Ernest Mutengesa, Medical Student                             | 35                                   |
| Worcestershire Royal Hospital                                                        | Mirella Ling, Consultant                                      | 35                                   |
| Worcestershire Royal Hospital                                                        | Christopher Green, Consultant                                 | 35                                   |
| Bristol Royal Infirmary, University Hospitals Bristol NHS Foundation Trust           | Martin Williams, Consultant                                   | 33                                   |

|    |                                                                            |                                       |    |
|----|----------------------------------------------------------------------------|---------------------------------------|----|
| 1  |                                                                            |                                       |    |
| 2  |                                                                            |                                       |    |
| 3  | Bristol Royal Infirmary, University Hospitals Bristol NHS Foundation Trust | Matthew Stevens, CMT                  | 33 |
| 4  | Victoria hospital, Kirkcaldy                                               | David Griffith, Consultant            | 32 |
| 5  | Victoria hospital, Kirkcaldy                                               | Naomi Bulteel, SpR                    | 32 |
| 6  | Northumbria Healthcare NHS Foundatio Trust                                 | Charlotte Milne, SpR                  | 30 |
| 7  | Northumbria Healthcare NHS Foundatio Trust                                 | Jayanta Sarma, Consultant             | 30 |
| 8  | Ninewells hospital, Dundee                                                 | Aline Wilson, SpR                     | 29 |
| 9  | Ninewells hospital, Dundee                                                 | John Shone, Consultant                | 29 |
| 10 | Ninewells hospital, Dundee                                                 | Lynn Urquhart, Consultant             | 29 |
| 11 | Ninewells hospital, Dundee                                                 | Sahar Eldirdiri, SpR                  | 29 |
| 12 | Royal Preston Hospital, Lancashire Teaching Hospitals NHS Foundation Trust | Alison Muir, Consultant               | 28 |
| 13 | Royal Preston Hospital, Lancashire Teaching Hospitals NHS Foundation Trust | Leila White, Clinical Scientist       | 28 |
| 14 | Sheffield teaching Hospitals                                               | Jody Aberdein, Consultant             | 28 |
| 15 | Sheffield teaching Hospitals                                               | Phillip Simpson, SpR                  | 28 |
| 16 | Shrewbury and Telford Hospital NHS Trust                                   | Hnin Hay Mar                          | 26 |
| 17 | Shrewbury and Telford Hospital NHS Trust                                   | John Bowen                            | 26 |
| 18 | Shrewbury and Telford Hospital NHS Trust                                   | Keying Tan                            | 26 |
| 19 | Shrewbury and Telford Hospital NHS Trust                                   | Eint Shwe Zin thein                   | 26 |
| 20 | Shrewbury and Telford Hospital NHS Trust                                   | Mahmoud Aziz                          | 26 |
| 21 | University Hospital North Midlands                                         | Anthony Cadwgan, Consultant           | 25 |
| 22 | University Hospital North Midlands                                         | Brendan Davies, Consultant            | 25 |
| 23 | University Hospital North Midlands                                         | Daniel White, SpR                     | 25 |
| 24 | University Hospital North Midlands                                         | Natasha Weston, SpR                   | 25 |
| 25 | University Hospital North Midlands                                         | Salman Zeb, CMT                       | 25 |
| 26 | St George's Hospital, London                                               | Angela Houston, Consultant            | 24 |
| 27 | St George's Hospital, London                                               | Imogen Fordham, clinical fellow       | 24 |
| 28 | St George's Hospital, London                                               | Terry John Evans, SpR                 | 24 |
| 29 | St George's Hospital, London                                               | Louise Wootton, Physician's associate | 24 |
| 30 | Nottingham University Hospitals NHS Trust                                  | David Turner, Consultant              | 24 |
| 31 | Nottingham University Hospitals NHS Trust                                  | Iona Willingham, SpR                  | 24 |
| 32 | Birmingham Queen Elizabeth Hospital                                        | Aimee Johnson, SpR                    | 23 |
| 33 | Birmingham Queen Elizabeth Hospital                                        | Nimal Wickramasinghe, Consultant      | 23 |
| 34 | Salford Royal Infirmary, Salford                                           | Ashley Horsley, SpR                   | 23 |
| 35 | Salford Royal Infirmary, Salford                                           | Eamonn Trainor, Consultant            | 23 |
| 36 | Salford Royal Infirmary, Salford                                           | Olivier Gaillemin, Consultant         | 23 |
| 37 | University Hospital Southampton NHS Foundation Trust                       | Andrew Rosser, Consultant             | 23 |
| 38 | University Hospital Southampton NHS Foundation Trust                       | Nicholas J Norton, SpR                | 23 |
| 39 | Royal Blackburn Hospital, East Lancashire Hospitals NHS Trust              | Iain Crossingham, Consultant          | 22 |
| 40 | Royal Blackburn Hospital, East Lancashire Hospitals NHS Trust              | Katie Cheung, Medical Student         | 22 |
| 41 | Royal Blackburn Hospital, East Lancashire Hospitals NHS Trust              | Megan Duxbury, CMT                    | 22 |
| 42 | Queen Elizabeth University Hospital, NHS Greater Glasgow and Clyde         | Ashutosh Deshpande, Consultant        | 22 |
| 43 | Queen Elizabeth University Hospital, NHS Greater Glasgow and Clyde         | Emilie Bellhouse, FY2                 | 22 |
| 44 | Queen Elizabeth University Hospital, NHS Greater Glasgow and Clyde         | Kamaljit Khalsa, SpR                  | 22 |
| 45 | Imperial College School of Medicine                                        | Helena Brezovjakova, Medical Student  | 22 |
| 46 | Imperial College School of Medicine                                        | Emma McLean, medical student          | 22 |
| 47 |                                                                            |                                       |    |
| 48 |                                                                            |                                       |    |
| 49 |                                                                            |                                       |    |
| 50 |                                                                            |                                       |    |
| 51 |                                                                            |                                       |    |
| 52 |                                                                            |                                       |    |
| 53 |                                                                            |                                       |    |
| 54 |                                                                            |                                       |    |
| 55 |                                                                            |                                       |    |
| 56 |                                                                            |                                       |    |
| 57 |                                                                            |                                       |    |
| 58 |                                                                            |                                       |    |
| 59 |                                                                            |                                       |    |
| 60 |                                                                            |                                       |    |

|    |                                                       |                                        |    |
|----|-------------------------------------------------------|----------------------------------------|----|
| 1  |                                                       |                                        |    |
| 2  |                                                       |                                        |    |
| 3  | Imperial college healthcare NHS trust                 | Tanmay, Kanitkar, CMT                  | 22 |
| 4  | Imperial college healthcare NHS trust                 | Nicholas Davies, Consultant            | 22 |
| 5  | Imperial College School of Medicine                   | Alexsander Dawidziuk, Medical Student  | 22 |
| 6  | Imperial College School of Medicine                   | Alexsander Dawidziuk, Medical Student  | 22 |
| 7  | St James University hospital, Leeds                   | Eloisa McLaughlin, Medical student     | 22 |
| 8  | St James University hospital, Leeds                   | Joanna Allen, Consultant               | 22 |
| 9  | St James University hospital, Leeds                   | Razan Saman, SpR                       | 22 |
| 10 | St James University hospital, Leeds                   | Sarah Kelly, SpR                       | 22 |
| 11 | St James University hospital, Leeds                   | Sarah Kelly, SpR                       | 22 |
| 12 | Royal Liverpool University Hospital, Liverpool        | Hugh Adler, SpR                        | 22 |
| 13 | Royal Liverpool University Hospital, Liverpool        | Sylviane Defres, Consultant            | 22 |
| 14 | Arrowe Park Hospital, Wirral                          | David Harvey, Consultant               | 21 |
| 15 | Arrowe Park Hospital, Wirral                          | David Harvey, Consultant               | 21 |
| 16 | Arrowe Park Hospital, Wirral                          | Elshadai Ejere, FY2                    | 21 |
| 17 | Queen's hospital, Romford                             | Aarti Shah, Consultant                 | 21 |
| 18 | Queen's hospital, Romford                             | Yiwen Soo, FY1                         | 21 |
| 19 | Raigmore Hospital, Inverness                          | Wendy Beadles, Consultant              | 21 |
| 20 | Raigmore Hospital, Inverness                          | Wendy Beadles, Consultant              | 21 |
| 21 | Raigmore Hospital, Inverness                          | Heather Sturgeon, Medical student      | 21 |
| 22 | Raigmore Hospital, Inverness                          | Heather Sturgeon, Medical student      | 21 |
| 23 | Raigmore Hospital, Inverness                          | Brodie Cameron, Medical Student        | 21 |
| 24 | James Cook University Hospital, Middlesbrough         | Brodie Cameron, Medical Student        | 21 |
| 25 | James Cook University Hospital, Middlesbrough         | Ben Tomlinson, SpR                     | 20 |
| 26 | James Cook University Hospital, Middlesbrough         | Ben Tomlinson, SpR                     | 20 |
| 27 | James Cook University Hospital, Middlesbrough         | David Chadwick, Consultant             | 20 |
| 28 | University Hospital Monklands                         | David Chadwick, Consultant             | 20 |
| 29 | University Hospital Monklands                         | Claire McGoldrick, Consultant          | 20 |
| 30 | University Hospital Monklands                         | Claire McGoldrick, Consultant          | 20 |
| 31 | University Hospital Monklands                         | Katie McDowell, FY2                    | 20 |
| 32 | Cumberland infirmary, Carlisle                        | Katie McDowell, FY2                    | 20 |
| 33 | Cumberland infirmary, Carlisle                        | Alastair Miller, Consultant            | 19 |
| 34 | Cumberland infirmary, Carlisle                        | Alastair Miller, Consultant            | 19 |
| 35 | Cumberland infirmary, Carlisle                        | Clive Graham, Consultant               | 19 |
| 36 | Cumberland infirmary, Carlisle                        | Clive Graham, Consultant               | 19 |
| 37 | Cumberland infirmary, Carlisle                        | Mpho Molosiwa, FY2                     | 19 |
| 38 | Newcastle Upon Tyne NHS Foundation Trust              | Mpho Molosiwa, FY2                     | 19 |
| 39 | Newcastle Upon Tyne NHS Foundation Trust              | Ewan Hunter, Consultant                | 19 |
| 40 | Newcastle Upon Tyne NHS Foundation Trust              | Ewan Hunter, Consultant                | 19 |
| 41 | Newcastle Upon Tyne NHS Foundation Trust              | Ruth Owen, Medical Student             | 19 |
| 42 | Newcastle Upon Tyne NHS Foundation Trust              | Ruth Owen, Medical Student             | 19 |
| 43 | Newcastle Upon Tyne NHS Foundation Trust              | Katherine Flack                        | 19 |
| 44 | Airedale hospital, Airedale                           | Katherine Flack                        | 19 |
| 45 | Airedale hospital, Airedale                           | Adrian Kennedy, Consultant             | 18 |
| 46 | Bradford Royal Infirmary, Bradford                    | Adrian Kennedy, Consultant             | 18 |
| 47 | Bradford Royal Infirmary, Bradford                    | Amy Robinson, Consultant               | 16 |
| 48 | Bradford Royal Infirmary                              | Amy Robinson, Consultant               | 16 |
| 49 | Bradford Royal Infirmary                              | Phoebe Cross, SpR                      | 16 |
| 50 | Bradford Royal Infirmary                              | Phoebe Cross, SpR                      | 16 |
| 51 | University Hospital Wales                             | Fay Perry                              | 16 |
| 52 | University Hospital Wales                             | Fay Perry                              | 16 |
| 53 | Aberdeen Royal Infirmary                              | Vithusha Inpadhas                      | 16 |
| 54 | Aberdeen Royal Infirmary                              | Vithusha Inpadhas                      | 16 |
| 55 | Aberdeen Royal Infirmary                              | Ali Khan, SpR                          | 15 |
| 56 | Aberdeen Royal Infirmary                              | Ali Khan, SpR                          | 15 |
| 57 | Aberdeen Royal Infirmary                              | Sarathy Selvam, FY2                    | 15 |
| 58 | Aberdeen Royal Infirmary                              | Sarathy Selvam, FY2                    | 15 |
| 59 | Aberdeen Royal Infirmary                              | Vhairi Bateman, Consultant             | 15 |
| 60 | Aberdeen Royal Infirmary                              | Vhairi Bateman, Consultant             | 15 |
| 61 | Aberdeen Royal Infirmary                              | Jeremy Wong, Medica Student            | 15 |
| 62 | Lancaster Royal Infirmary                             | Jeremy Wong, Medica Student            | 15 |
| 63 | Lancaster Royal Infirmary                             | Henry Wu, FY2                          | 15 |
| 64 | Lancaster Royal Infirmary                             | Henry Wu, FY2                          | 15 |
| 65 | Lancaster Royal Infirmary                             | Monika Pasztor, Consultant             | 15 |
| 66 | Lancaster Royal Infirmary                             | Monika Pasztor, Consultant             | 15 |
| 67 | Whittington Hospital, London                          | Trupti Patel, Consultant               | 14 |
| 68 | Whittington Hospital, London                          | Trupti Patel, Consultant               | 14 |
| 69 | Whittington Hospital, London                          | Ajanthiha Karunakaran, Medical Student | 14 |
| 70 | Whittington Hospital, London                          | Ajanthiha Karunakaran, Medical Student | 14 |
| 71 | Russells Hall Hospital, Dudley                        | Basma Soliman, CT1                     | 13 |
| 72 | Russells Hall Hospital, Dudley                        | Basma Soliman, CT1                     | 13 |
| 73 | Russells Hall Hospital, Dudley                        | Hassan Paraiso, Consultant             | 13 |
| 74 | Russells Hall Hospital, Dudley                        | Hassan Paraiso, Consultant             | 13 |
| 75 | Glasgow Royal Infirmary                               | Mairi McLeod, Consultant               | 13 |
| 76 | Glasgow Royal Infirmary                               | Mairi McLeod, Consultant               | 13 |
| 77 | Glasgow Royal Infirmary                               | Su su Htwe, SpR                        | 13 |
| 78 | Glasgow Royal Infirmary                               | Su su Htwe, SpR                        | 13 |
| 79 | Glasgow Royal Infirmary                               | Anna Smith                             | 13 |
| 80 | Glasgow Royal Infirmary                               | Anna Smith                             | 13 |
| 81 | James Paget University Hospitals NHS Foundation Trust | Andrew Blanshard, CMT                  | 12 |
| 82 | James Paget University Hospitals NHS Foundation Trust | Andrew Blanshard, CMT                  | 12 |
| 83 | James Paget University Hospitals NHS Foundation Trust | Harish Reddy, Consultant               | 12 |
| 84 | James Paget University Hospitals NHS Foundation Trust | Harish Reddy, Consultant               | 12 |

|    |                                                                                                            |                                  |    |
|----|------------------------------------------------------------------------------------------------------------|----------------------------------|----|
| 1  |                                                                                                            |                                  |    |
| 2  |                                                                                                            |                                  |    |
| 3  | Portsmouth Hospitals University NHS Trust                                                                  | Avneet Shahi, SpR                | 12 |
| 4  | Portsmouth Hospitals University NHS Trust                                                                  | Helen Chesterfield, Consultant   | 12 |
| 5  | Portsmouth Hospitals University NHS Trust                                                                  | Oliver Bannister, CMT            | 12 |
| 6  | Withybush hospital, Haverford West                                                                         | Ben Schroeder, Medical Student   | 12 |
| 7  | Withybush hospital, Haverford West                                                                         | Ken Woodhouse, Consultant        | 12 |
| 8  | Ashford and St Peter's NHS Foundation Trust                                                                | Jan Coebergh, Consultant         | 11 |
| 9  | Ashford and St Peter's NHS Foundation Trust                                                                | Viva Levee, FY2                  | 11 |
| 10 | Mater Misericordiae University Hospital, Dublin                                                            | Eavan Muldoon, Consultant        | 11 |
| 11 | Mater Misericordiae University Hospital, Dublin                                                            | Rhea O'regan, SPR                | 11 |
| 12 | Mater Misericordiae University Hospital, Dublin                                                            | Tee Keat Teoh, SpR               | 11 |
| 13 | Newham Hospital, Barts Health NHS Trust                                                                    | Sathyavani Subbarao, SpR         | 11 |
| 14 | Newham Hospital, Barts Health NHS Trust                                                                    | Simon Tiberi, Consultant         | 11 |
| 15 | Newham Hospital, Barts Health NHS Trust                                                                    | Caryn Rosmarin                   | 11 |
| 16 | London UCL and Hospital for Tropical diseases at University College London Hospitals NHS Foundation Trust. | Jayne Ellis, SpR                 | 10 |
| 17 | London UCL and Hospital for Tropical diseases at University College London Hospitals NHS Foundation Trust. | Lucy Bell, CMT                   | 10 |
| 18 | London UCL and Hospital for Tropical diseases at University College London Hospitals NHS Foundation Trust. | Robert Heyderman, Consultant     | 10 |
| 19 | Barts Health NHS Trust                                                                                     | Jonathan Lambourne, Consultant   | 10 |
| 20 | Barts Health NHS Trust                                                                                     | Emma McGuire, SpR                | 10 |
| 21 | Barts Health NHS Trust                                                                                     | Robert Serafino, Consultant      | 10 |
| 22 | Guy's and St Thomas' NHS Foundation Trust                                                                  | Anna Goodman, Consultant         | 9  |
| 23 | Guy's and St Thomas' NHS Foundation Trust                                                                  | Ishaan Bhide, FY1                |    |
| 24 | Guy's and St Thomas' NHS Foundation Trust                                                                  | Karanjeet Sagoo, Medical Student |    |
| 25 | Whipps Cross, Barte Health NHS Trust                                                                       | Mark Melzer, Consultant          | 8  |
| 26 | Whipps Cross, Barte Health NHS Trust                                                                       | Maria Krutikov, SpR              | 8  |
| 27 | The Royal Free Hospital, London                                                                            | Indran Balakrishnan, Consultant  | 6  |
| 28 | The Royal Free Hospital, London                                                                            | Susan Hopkins, Consultant        | 6  |
| 29 | The Royal Free Hospital, London                                                                            | Tim Jones, SpR                   | 6  |
| 30 | Trafford General Hospital, Manchester University NHS Foundation Trust                                      | Kajal Patel, Medical Student     | 4  |
| 31 | Trafford General Hospital, Manchester University NHS Foundation Trust                                      | Barzo Faris, Consultant          |    |
| 32 | William Harvey Hospital, East Kent                                                                         | Graeme Calver, Consultant        | 3  |
| 33 | William Harvey Hospital, East Kent                                                                         | Ricky Singh, Medical Student     | 3  |
| 34 | William Harvey Hospital, East Kent                                                                         | Hazel Sanghvi, Medical Student   | 3  |
| 35 | Tameside General Hospital                                                                                  | Mohamed Eltayeb, Clinical Fellow | 2  |
| 36 | Tameside General Hospital                                                                                  | Rathur Haris, Consultant         | 2  |
| 37 |                                                                                                            |                                  |    |
| 38 |                                                                                                            |                                  |    |
| 39 |                                                                                                            |                                  |    |
| 40 |                                                                                                            |                                  |    |
| 41 |                                                                                                            |                                  |    |
| 42 |                                                                                                            |                                  |    |
| 43 |                                                                                                            |                                  |    |
| 44 |                                                                                                            |                                  |    |
| 45 |                                                                                                            |                                  |    |
| 46 |                                                                                                            |                                  |    |
| 47 |                                                                                                            |                                  |    |
| 48 |                                                                                                            |                                  |    |
| 49 |                                                                                                            |                                  |    |
| 50 |                                                                                                            |                                  |    |
| 51 |                                                                                                            |                                  |    |
| 52 |                                                                                                            |                                  |    |
| 53 |                                                                                                            |                                  |    |
| 54 |                                                                                                            |                                  |    |
| 55 |                                                                                                            |                                  |    |
| 56 |                                                                                                            |                                  |    |
| 57 |                                                                                                            |                                  |    |
| 58 |                                                                                                            |                                  |    |
| 59 |                                                                                                            |                                  |    |
| 60 |                                                                                                            |                                  |    |

STROBE Statement—Checklist of items that should be included in reports of *cohort studies*

|                           | Item No | Recommendation                                                                                                                                                                       | Location in paper                           |
|---------------------------|---------|--------------------------------------------------------------------------------------------------------------------------------------------------------------------------------------|---------------------------------------------|
| <b>Title and abstract</b> | 1       | (a) Indicate the study's design with a commonly used term in the title or the abstract                                                                                               | Title, page 1, line 1                       |
|                           |         | (b) Provide in the abstract an informative and balanced summary of what was done and what was found                                                                                  | Abstract, page 2, line 40 onwards           |
| <b>Introduction</b>       |         |                                                                                                                                                                                      |                                             |
| Background/rationale      | 2       | Explain the scientific background and rationale for the investigation being reported                                                                                                 | Introduction, page 4 line 80 onwards        |
| Objectives                | 3       | State specific objectives, including any prespecified hypotheses                                                                                                                     | Introduction, page 5, line 104              |
| <b>Methods</b>            |         |                                                                                                                                                                                      |                                             |
| Study design              | 4       | Present key elements of study design early in the paper                                                                                                                              | Methods, page 5, line 108 onwards           |
| Setting                   | 5       | Describe the setting, locations, and relevant dates, including periods of recruitment, exposure, follow-up, and data collection                                                      | Methods, page 5, line 108 onwards           |
| Participants              | 6       | (a) Give the eligibility criteria, and the sources and methods of selection of participants. Describe methods of follow-up                                                           | Methods, page 6, box 1                      |
|                           |         | (b) For matched studies, give matching criteria and number of exposed and unexposed                                                                                                  | NA                                          |
| Variables                 | 7       | Clearly define all outcomes, exposures, predictors, potential confounders, and effect modifiers. Give diagnostic criteria, if applicable                                             | Methods, page 6, box 1 and line 125 onwards |
| Data sources/measurement  | 8*      | For each variable of interest, give sources of data and details of methods of assessment (measurement). Describe comparability of assessment methods if there is more than one group | Methods, page 5, line 110 onwards           |
| Bias                      | 9       | Describe any efforts to address potential sources of bias                                                                                                                            | Methods, page 5, line 117 onwards           |
|                           |         |                                                                                                                                                                                      | Discussion, page 17, line 294 onwards       |
| Study size                | 10      | Explain how the study size was arrived at                                                                                                                                            | Methods, page 5, line 110 onwards           |
| Quantitative variables    | 11      | Explain how quantitative variables were handled in the analyses. If applicable, describe which groupings were chosen and why                                                         | Methods, page 7, line 141 onwards           |
| Statistical methods       | 12      | (a) Describe all statistical methods, including those used to control for confounding                                                                                                | Methods, page 7, line 141 onwards           |
|                           |         | (b) Describe any methods used to examine subgroups and interactions                                                                                                                  | NA                                          |
|                           |         | (c) Explain how missing data were addressed                                                                                                                                          | Methods, page 6, line 130                   |
|                           |         | (d) If applicable, explain how loss to follow-up was addressed                                                                                                                       | NA                                          |
|                           |         | (e) Describe any sensitivity analyses                                                                                                                                                | NA                                          |

**Results**

|    |                          |     |                                                                                                                                                                                                              |                                                       |  |
|----|--------------------------|-----|--------------------------------------------------------------------------------------------------------------------------------------------------------------------------------------------------------------|-------------------------------------------------------|--|
| 1  | Participants             | 13* | (a) Report numbers of individuals at each stage of study—eg numbers potentially eligible, examined for eligibility, confirmed eligible, included in the study, completing follow-up, and analysed            | Results, page 7, line 156                             |  |
| 2  |                          |     | (b) Give reasons for non-participation at each stage                                                                                                                                                         | NA                                                    |  |
| 3  |                          |     | (c) Consider use of a flow diagram                                                                                                                                                                           | NA                                                    |  |
| 4  | Descriptive data         | 14* | (a) Give characteristics of study participants (eg demographic, clinical, social) and information on exposures and potential confounders                                                                     | Page 9, Table 1                                       |  |
| 5  |                          |     | (b) Indicate number of participants with missing data for each variable of interest                                                                                                                          | Page 10, Table 2                                      |  |
| 6  |                          |     | (c) Summarise follow-up time (eg, average and total amount)                                                                                                                                                  | NA                                                    |  |
| 7  | Outcome data             | 15* | Report numbers of outcome events or summary measures over time                                                                                                                                               | Page 9 Table 1, page 10, table 2 and page 15, table 3 |  |
| 8  | Main results             | 16  | (a) Give unadjusted estimates and, if applicable, confounder-adjusted estimates and their precision (eg, 95% confidence interval). Make clear which confounders were adjusted for and why they were included | Results, page 14, line 230 onwards                    |  |
| 9  |                          |     | (b) Report category boundaries when continuous variables were categorized                                                                                                                                    | NA                                                    |  |
| 10 |                          |     | (c) If relevant, consider translating estimates of relative risk into absolute risk for a meaningful time period                                                                                             | NA                                                    |  |
| 11 | Other analyses           | 17  | Report other analyses done—eg analyses of subgroups and interactions, and sensitivity analyses                                                                                                               | NA                                                    |  |
| 12 | <b>Discussion</b>        |     |                                                                                                                                                                                                              |                                                       |  |
| 13 | Key results              | 18  | Summarise key results with reference to study objectives                                                                                                                                                     | Discussion, page 16 line 249 onwards                  |  |
| 14 | Limitations              | 19  | Discuss limitations of the study, taking into account sources of potential bias or imprecision. Discuss both direction and magnitude of any potential bias                                                   | Discussion, page 17, line 294 onwards                 |  |
| 15 | Interpretation           | 20  | Give a cautious overall interpretation of results considering objectives, limitations, multiplicity of analyses, results from similar studies, and other relevant evidence                                   | Conclusion, page 18, line 313 onwards                 |  |
| 16 | Generalisability         | 21  | Discuss the generalisability (external validity) of the study results                                                                                                                                        | Discussion, page 17 line 296-8                        |  |
| 17 | <b>Other information</b> |     |                                                                                                                                                                                                              |                                                       |  |
| 18 | Funding                  | 22  | Give the source of funding and the role of the funders for the present study and, if applicable, for the original study on which the present article is based                                                | Page 22, Line 439                                     |  |

\*Give information separately for exposed and unexposed groups.

**Note:** An Explanation and Elaboration article discusses each checklist item and gives methodological background and published examples of transparent reporting. The STROBE checklist is best used in conjunction with this article (freely available on the Web sites of PLoS Medicine at <http://www.plosmedicine.org/>, Annals of Internal Medicine at <http://www.annals.org/>, and Epidemiology at <http://www.epidem.com/>). Information on the STROBE Initiative is available at <http://www.strobe-statement.org>.

1  
2  
3  
4  
5  
6  
7  
8  
9  
10  
11  
12  
13  
14  
15  
16  
17  
18  
19  
20  
21  
22  
23  
24  
25  
26  
27  
28  
29  
30  
31  
32  
33  
34  
35  
36  
37  
38  
39  
40  
41  
42  
43  
44  
45  
46  
47  
48  
49  
50  
51  
52  
53  
54  
55  
56  
57  
58  
59  
60

For peer review only
