# Supplementary material for: Clinical management of community-acquired meningitis in adults in the UK and Ireland in 2017: a retrospective cohort study on behalf of the National Infection Trainees Collaborative for Audit and Research (NITCAR)
Source: PubMed Central journal article supplement (PMC9315913; doi:10.1136/bmjopen-2022-062698), 2022-07-12
Supplement: bmjopen-2022-062698supp002.pdf [file bmjopen-2022-062698supp002.pdf]

**Supplementary table 1 . Risk factors for Listeria stratified by aetiology.**

|                                                        | <b>Total cohort<br/>N (%)</b> | <b>Bacterial<br/>meningitis<br/>N (%)</b> | <b>Viral meningitis<br/>N (%)</b> | <b>Other<br/>meningitis†<br/>N (%)</b> | <b>P value</b> |
|--------------------------------------------------------|-------------------------------|-------------------------------------------|-----------------------------------|----------------------------------------|----------------|
| <b>N</b>                                               | 1,471 (100)                   | 302 (21)                                  | 615 (42)                          | 553 (38)                               | -              |
| <b>Age &gt;60 years</b>                                | 235 (16)                      | 126 (42)                                  | 27 (4)                            | 79 (14)                                | <0.001         |
| <b>Number immunocompromised by disease/medication*</b> | 60 (4)                        | 14 (5)                                    | 18 (3)                            | 28 (5)                                 | 0.23           |
| <b>Number with Diabetes mellitus</b>                   | 64 (4)                        | 30 (10)                                   | 11 (2)                            | 22 (4)                                 | <0.001         |
| <b>Number with a history of alcohol excess</b>         | 36 (2)                        | 21 (7)                                    | 3 (0.5)                           | 12 (2)                                 | <0.001         |

†= other meningitis category included all patients without a confirmed bacterial or viral pathogen

\*=Conditions listed as immunocompromising conditions included haematological malignancy (n=8), Other malignancy (n=8), solid organ transplant (n=6), liver cirrhosis (n=1), HIV (n=9), Pregnancy (n=2). Medication listed included Steroids (n=7), tocilizumab, eculizumab and infliximab (n=6), Methotrexate (n=8), Mycophenolate (n=2), Azathioprine (n=3), 'chemotherapy' (n=4). (some patients had more than one immunocompromising condition/medication).

**Supplementary table 2: Multivariate analysis of the association between baseline co-variables and in-hospital mortality in 266 patients with bacterial meningitis confirmed by CSF analysis using logistic regression modelling:**

| Baseline co-variate                                                  | N   | In-hospital mortality N (%) <sup>1</sup> | Crude OR for in-hospital mortality (95% CI) | P-value | Adjusted OR for in-hospital mortality (95% CI)* | P-value† |
|----------------------------------------------------------------------|-----|------------------------------------------|---------------------------------------------|---------|-------------------------------------------------|----------|
| <b>Sex</b>                                                           |     |                                          |                                             |         |                                                 |          |
| Male                                                                 | 147 | 15 (10.2)                                | 1                                           |         |                                                 |          |
| Female                                                               | 118 | 7 (5.93)                                 | 0.55 (0.22-1.42)                            | 0.21    |                                                 |          |
| <b>Age group</b>                                                     |     |                                          |                                             |         |                                                 |          |
| ≤ 18 years                                                           | 16  | 0 (0)                                    | -                                           |         |                                                 |          |
| 19 – 59 years                                                        | 136 | 10 (7.35)                                | 1                                           |         |                                                 |          |
| ≥ 60 years                                                           | 113 | 12 (10.6)                                | 1.50 (0.62-3.61)                            | 0.37    |                                                 |          |
| <b>Blood culture positive</b>                                        |     |                                          |                                             |         |                                                 |          |
| No                                                                   | 130 | 8 (6.15)                                 | 1                                           |         | 1                                               |          |
| Yes                                                                  | 135 | 14 (10.4)                                | 1.76 (0.71-4.38)                            | 0.21    | 1.46 (0.58-3.71)                                | 0.42     |
| <b>GCS ≤ 13<sup>2</sup></b>                                          |     |                                          |                                             |         |                                                 |          |
| No                                                                   | 106 | 3 (2.83)                                 | 1                                           |         | 1                                               |          |
| Yes                                                                  | 132 | 17 (12.9)                                | 5.05 (1.41-18.2)                            | 0.006   | 4.41 (1.24-15.7)                                | 0.009    |
| <b>IV dexamethasone given<sup>3</sup></b>                            |     |                                          |                                             |         |                                                 |          |
| No                                                                   | 124 | 10 (8.06)                                | 1                                           |         | 1                                               |          |
| Yes                                                                  | 137 | 11 (8.03)                                | 0.99 (0.41-2.43)                            | 0.99    | 1.02 (0.41-2.52)                                | 0.96     |
| <b>IV dexamethasone given if <i>Strep.pneumoniae</i><sup>4</sup></b> |     |                                          |                                             |         |                                                 |          |
| No                                                                   | 62  | 8 (12.9)                                 | 1                                           |         | 1                                               |          |
| Yes                                                                  | 89  | 8 (8.99)                                 | 0.67 (0.23-1.89)                            | 0.44    | 0.68 (0.24-1.94)                                | 0.48     |
| <b>Final diagnosis <i>S. pneumoniae</i></b>                          |     |                                          |                                             |         |                                                 |          |
| No                                                                   | 107 | 5 (4.46)                                 | 1                                           |         | 1                                               |          |
| Yes                                                                  | 136 | 17 (11.1)                                | 2.67 (0.95-7.55)                            | 0.05    | 2.37 (0.84-6.67)                                | 0.08     |
| <b>ITU admission<sup>5</sup></b>                                     |     |                                          |                                             |         |                                                 |          |
| No                                                                   | 129 | 4 (3.01)                                 | 1                                           |         | 1                                               |          |
| Yes                                                                  | 113 | 18 (13.7)                                | 5.14 (1.65-16.0)                            | 0.002   | 4.44 (1.44-13.6)                                | 0.003    |

\*adjusted for sex and age group

† P-value from LRT comparing models with and without primary exposure variable

1 = One participant had missing outcome data

2 = 28/266 (10%) participants did not have a GCS recorded

3 = 4/266 (1%) participants had missing data on IV dexamethasone administration

4 = 2/154 (1%) participants with confirmed *S. pneumoniae* meningitis had missing data on IV dexamethasone administration

5 = 2/266 (0.7%) participants had missing data on ITU admission

**Supplementary table 3: Multivariate analysis of the association between baseline co-variates and in-hospital mortality in 359 patients with bacterial meningitis using the Spanos criteria<sup>^</sup> using logistic regression modelling:**

| Baseline co-variate                                                  | N   | In-hospital mortality N (%) <sup>1</sup> | Crude OR for in-hospital mortality (95% CI) | P-value | Adjusted OR for in-hospital mortality (95% CI)* | P-value <sup>†</sup> |
|----------------------------------------------------------------------|-----|------------------------------------------|---------------------------------------------|---------|-------------------------------------------------|----------------------|
| <b>Sex</b>                                                           |     |                                          |                                             |         |                                                 |                      |
| Male                                                                 | 199 | 28 (14.1)                                | 1                                           |         |                                                 |                      |
| Female                                                               | 159 | 13 (8.18)                                | 0.54 (0.27-1.09)                            | 0.08    |                                                 |                      |
| <b>Age group</b>                                                     |     |                                          |                                             |         |                                                 |                      |
| ≤ 18 years                                                           | 21  | 0 (0)                                    | -                                           |         |                                                 |                      |
| 19 – 59 years                                                        | 192 | 18 (9.38)                                | 1                                           |         |                                                 |                      |
| ≥ 60 years                                                           | 145 | 23 (15.9)                                | 1.82 (0.94-3.52)                            | 0.07    |                                                 |                      |
| <b>Blood culture positive</b>                                        |     |                                          |                                             |         |                                                 |                      |
| No                                                                   | 188 | 14 (7.45)                                | 1                                           |         | 1                                               |                      |
| Yes                                                                  | 170 | 27 (15.9)                                | 2.35 (1.18-4.68)                            | 0.01    | 1.93 (0.96-3.89)                                | 0.06                 |
| <b>GCS ≤ 13<sup>2</sup></b>                                          |     |                                          |                                             |         |                                                 |                      |
| No                                                                   | 163 | 9 (5.52)                                 | 1                                           |         | 1                                               |                      |
| Yes                                                                  | 156 | 28 (17.9)                                | 3.74 (1.67-8.36)                            | <0.001  | 3.19 (1.44-7.09)                                | 0.003                |
| <b>IV dexamethasone given<sup>3</sup></b>                            |     |                                          |                                             |         |                                                 |                      |
| No                                                                   | 189 | 26 (13.8)                                | 1                                           |         | 1                                               |                      |
| Yes                                                                  | 162 | 14 (8.64)                                | 0.59 (0.30-1.18)                            | 0.13    | 0.57 (0.28-1.14)                                | 0.11                 |
| <b>IV dexamethasone given if <i>Strep.pneumoniae</i><sup>4</sup></b> |     |                                          |                                             |         |                                                 |                      |
| No                                                                   | 73  | 16 (21.9)                                | 1                                           |         | 1                                               |                      |
| Yes                                                                  | 96  | 11 (11.5)                                | 0.46 (0.19-1.08)                            | 0.07    | 0.47 (0.20-1.10)                                | 0.08                 |
| <b>Final diagnosis <i>S. pneumoniae</i></b>                          |     |                                          |                                             |         |                                                 |                      |
| No                                                                   | 187 | 13 (6.95)                                | 1                                           |         | 1                                               |                      |
| Yes                                                                  | 171 | 28 (16.4)                                | 2.62 (1.30-5.29)                            | 0.005   | 2.29 (1.14-4.63)                                | 0.02                 |
| <b>ITU admission<sup>5</sup></b>                                     |     |                                          |                                             |         |                                                 |                      |
| No                                                                   | 192 | 9 (4.69)                                 | 1                                           |         | 1                                               |                      |
| Yes                                                                  | 163 | 32 (19.6)                                | 4.97 (2.24-11.0)                            | <0.001  | 4.43 (2.03-9.68)                                | <0.001               |

\*adjusted for sex and age group

<sup>†</sup> P-value from LRT comparing models with and without primary exposure variable

1 = One participant had missing outcome data

2 = 40/359 (11%) participants did not have a GCS recorded

3 = 7/359 (2%) participants had missing data on IV dexamethasone administration

4 = 2/172 (1%) participants with confirmed *S. pneumoniae* meningitis had missing data on IV dexamethasone administration

5 = 4/359 (1%) participants had missing data on ITU admission

<sup>^</sup> - Spanos criteria use various parameters to allow patients who have not had an aetiological agent to be assumed to be likely bacterial in nature.
